# Supplementary material for: Standardization of PGC-LC-MS-based glycomics for sample specific glycotyping
Source: Royal Society of Chemistry journal article supplement (doi:10.1039/c9an00486f), 2019-01-01
Supplement: c9an00486f2.xlsx [file c9an00486f2.xlsx]

## Sheet: RT to GU calculations
	Apex Retention time								Equation parameters			Equation fit check
File/Sample	3	4	5	6	7	8	9	10	Slope	Intercept	Fit	3 check	4 Check	5 Check	6 Check	7 Check	8 Check	9 Check	10 Check
CA_HNELAD_NG_270917		15.559	20.5755	25.0785	28.9495	32.228	35.072	37.916	24.447	-18.5823	0.999783		4.04121	4.96167	5.96516	6.98859	7.99155	8.97747	10.085
CA_CBHILAD_NG_270917		15.5582	20.5982	25.1582	28.9582	32.3182	35.2382	38.0382	24.6013	-18.8059	0.991684		4.04241	4.9615	5.97189	6.96938	7.98931	8.99616	10.0806
CA_iggLAD_NG_270917		15.1936	20.3601	24.8857	29.0509	32.335	35.3788	38.3826	25.3368	-20.2448	0.991071		4.0499	4.96594	5.93711	6.99794	7.96641	8.9833	10.114
CA_FetLAD_NG_270917		15.3042	20.3981	25.1856	29.1688	32.5775	35.5649	38.5523	25.4456	-20.2853	0.991444		4.04973	4.94728	5.97142	6.98331	7.98434	8.97898	10.0975
CA_igaLAD_NG_270917		15.4198	20.6614	25.3622	29.2726	32.7254	35.7622	38.7158	25.4435	-20.1145	0.991423		4.04141	4.96595	5.97365	6.96604	7.97851	8.98994	10.0965
CA_BLFLAD_NG_270917		15.4465	20.81	25.4689	29.5013	32.8291	35.8828	38.8582	25.5245	-20.1432	0.991717		4.03228	4.9752	5.97145	6.99345	7.96732	8.97987	10.0901
CA_HLFLAD_NG_270917		15.5385	20.9105	25.4925	29.4425	32.958	36.039	38.962	25.569	-20.1498	0.990511		4.03805	4.98214	5.95995	6.95559	7.98078	9.00279	10.0931
CA_U87clLAD_NG_051017	14.65	19.77	23.2	26	28.27	30.21	31.99	33.71	15.5753	-2.08248	0.993922	2.92793	4.06747	5.0695	6.0679	7.01996	7.95112	8.91376	9.95453
CA_CBHILAD_OG_051017	15.0881	19.3836	23.3667	26.2174	28.4432	30.3567	32.0358	33.7931	15.529	-1.88842	0.99885	2.98386	3.93468	5.08515	6.10981	7.05143	7.97609	8.88691	9.95165
CA_PGMLAD_OG_051017	14.9771	19.8396	23.3795	26.1414	28.281	30.2648	32.0153	33.4157	15.2319	-1.3995	0.994967	2.93045	4.03251	5.08751	6.09892	7.01867	7.99503	8.96873	9.83239

## Sheet: NG Table Summary
ID	Composition	Glycan Type	GlyTouCan ID	Sample Source	Observed precursor m/z	Neutral mass (reduced)	Theoretical neutral mass	Chemical formula	Error	Charge	Adduct	Retention time	GU value	Count	Sialylated deviation	Reference MS2 spectra	MS2 Scan#	Equation intercept	Equation slope	EQN type	Fucose
12	(HexNAc)3 + (Man)3(GlcNAc)2	Complex Bi	G31411IU	IgA	759.86	1521.73	1521.58	C58H99O41N5	0.152984	-2	[M-2H]	18.1	4.53	5	5	CA_igaLAD_NG_270917	1343	20.285	25.446	Logarithmic	N
17	(Hex)1 (HexNAc)3 + (Man)3(GlcNAc)2	Complex Bi	G72261BF	IgA	840.86	1683.73	1683.63	C64H109O46N5	0.100159	-2	[M-2H]	20.4	4.94	5	5	CA_igaLAD_NG_270917	1511	20.285	25.446	Logarithmic	N
19	(Hex)1 (HexNAc)3 (NeuAc)1 + (Man)3(GlcNAc)2	Complex Bi	Ambiguous	IgA	986.44	1974.89	1974.73	C75H126O54N6	0.16474	-2	[M-2H]	20.5	4.97	5	5.5	CA_igaLAD_NG_270917	1649	20.285	25.446	Logarithmic	N
20	(Hex)1 (HexNAc)3 + (Man)3(GlcNAc)2	Complex Bi	G38843SX	IgA	840.86	1683.73	1683.63	C64H109O46N5	0.100159	-2	[M-2H]	20.8	5.02	5	5	CA_igaLAD_NG_270917	1551	20.285	25.446	Logarithmic	N
22	(Hex)1 (HexNAc)3 + (Man)3(GlcNAc)2	Complex Bi	G62621XS	IgA	840.86	1683.73	1683.63	C64H109O46N5	0.100159	-2	[M-2H]	21.2	5.11	5	5	CA_igaLAD_NG_270917	1563	20.285	25.446	Logarithmic	N
24	(HexNAc)3 + (Man)3(GlcNAc)2	Complex Bi	G21251LN	IgA	759.86	1521.73	1521.58	C58H99O41N5	0.152984	-2	[M-2H]	21.5	5.17	5	5	CA_igaLAD_NG_270917	1593	20.285	25.446	Logarithmic	N
42	(HexNAc)2 (Deoxyhexose)1 + (Man)3(GlcNAc)2	Complex Bi	G18043EY	IgA	731.32	1464.65	1464.56	C56H96O40N4	0.094448	-2	[M-2H]	21.8	5.23	5	5	CA_igaLAD_NG_270917	1621	20.285	25.446	Logarithmic	Core
28	(Hex)2 (HexNAc)3 (NeuAc)1 + (Man)3(GlcNAc)2	Complex Bi	Ambiguous	IgA	1067.49	2136.99	2136.78	C81H136O59N6	0.211915	-2	[M-2H]	22.5	5.38	5	5.5	CA_igaLAD_NG_270917	1671	20.285	25.446	Logarithmic	N
30	(Hex)2 (HexNAc)3 (NeuAc)2 + (Man)3(GlcNAc)2	Complex Bi	Ambiguous	IgG	1213.04	2428.09	2427.88	C92H153O67N7	0.216496	-2	[M-2H]	22.6	5.42	5	5.5	CA_iggLAD_NG_270917	1714	20.245	25.337	Logarithmic	N
33	(Hex)2 (HexNAc)3 (NeuAc)1 + (Man)3(GlcNAc)2	Complex Bi	Ambiguous	IgA	1067.49	2136.99	2136.78	C81H136O59N6	0.211915	-2	[M-2H]	23.1	5.49	5	5.5	CA_igaLAD_NG_270917	1707	20.285	25.446	Logarithmic	N
36	(Hex)1 (HexNAc)2 (NeuGc)1 + (Man)3(GlcNAc)2	Complex Bi	Ambiguous	BLF	892.9	1787.81	1787.65	C67H113O50N5	0.169199	-2	[M-2H]	23.5	5.56	5	5.5	CA_BLFLAD_NG_270917	1756	20.115	25.444	Logarithmic	N
49	(HexNAc)2 (Deoxyhexose)1 + (Man)3(GlcNAc)2	Complex Bi	G26403JU	IgA	731.32	1464.65	1464.56	C56H96O40N4	0.094448	-2	[M-2H]	24.1	5.73	5	5	CA_igaLAD_NG_270917	1795	20.285	25.446	Logarithmic	Core
45	(HexNAc)3 (Deoxyhexose)1 + (Man)3(GlcNAc)2	Complex Bi	G27196XM	IgA	832.89	1667.79	1667.64	C64H109O45N5	0.155074	-2	[M-2H]	24.1	5.73	5	5	CA_igaLAD_NG_270917	1779	20.285	25.446	Logarithmic	Core
46	(HexNAc)2 + (Man)3(GlcNAc)2	Complex Bi	Ambiguous	IgA	1317.59	1318.6	1318.5	C50H86O36N4	0.095086	-1	[M-H]-	24.4	5.79	5	5	CA_igaLAD_NG_270917	1804	20.285	25.446	Logarithmic	N
51	(Hex)1 (HexNAc)2 + (Man)3(GlcNAc)2	Complex Bi	G23025EY	BLF	739.35	1480.71	1480.56	C56H96O41N4	0.159533	-2	[M-2H]	24.9	5.86	5	5	CA_BLFLAD_NG_270917	1854	20.115	25.444	Logarithmic	N
56	(HexNAc)2 + (Man)3(GlcNAc)2	Complex Bi	Ambiguous	IgA	1317.59	1318.6	1318.5	C50H86O36N4	0.095086	-1	[M-H]-	25.1	5.95	5	5	CA_igaLAD_NG_270917	1851	20.285	25.446	Logarithmic	N
59	(Hex)2 (HexNAc)2 + (Man)3(GlcNAc)2	Complex Bi	G52233HF	BLF	820.36	1642.73	1642.61	C62H106O46N4	0.126708	-2	[M-2H]	25.4	5.98	5	5	CA_BLFLAD_NG_270917	1897	20.115	25.444	Logarithmic	N
61	(HexNAc)2 + (Man)3(GlcNAc)2	Complex Bi	Ambiguous	BLF	1317.59	1318.6	1318.5	C50H86O36N4	0.095086	-1	[M-H]-	25.5	6.02	5	5	CA_BLFLAD_NG_270917	1907	20.115	25.444	Logarithmic	N
68	(Hex)1 (HexNAc)3 (Deoxyhexose)1 + (Man)3(GlcNAc)2	Complex Bi	Ambiguous	IgA	913.91	1829.83	1829.69	C70H119O50N5	0.142249	-2	[M-2H]	25.7	6.11	5	5	CA_igaLAD_NG_270917	1897	20.285	25.446	Logarithmic	Core
66	(Hex)2 (HexNAc)2 (NeuAc)1 + (Man)3(GlcNAc)2	Complex Bi	Ambiguous	BLF	965.94	1933.89	1933.7	C73H123O54N5	0.191289	-2	[M-2H]	26	6.13	5	5.5	CA_BLFLAD_NG_270917	1939	20.115	25.444	Logarithmic	N
69	(Hex)1 (HexNAc)3 (Deoxyhexose)1 + (Man)3(GlcNAc)2	Complex Bi	Ambiguous	IgA	913.91	1829.83	1829.69	C70H119O50N5	0.142249	-2	[M-2H]	26.3	6.25	5	5	CA_igaLAD_NG_270917	1935	20.285	25.446	Logarithmic	Core
73	(Hex)2 (HexNAc)2 (NeuAc)3 + (Man)3(GlcNAc)2	Complex Bi	Ambiguous	Fet	1257.22	2516.45	2515.89	C95H157O70N7	0.560451	-2	[M-2H]	26.6	6.31	5	5.5	CA_FetLAD_NG_270917	1980	20.285	25.446	Logarithmic	N
96	(Hex)2 (HexNAc)2 (Deoxyhexose)2 + (Man)3(GlcNAc)2	Complex Bi	G45866FA	HLF	966.42	1934.85	1934.72	C74H126O54N4	0.130888	-2	[M-2H]	27.3	6.42	5	5	CA_HLFLAD_NG_270917	2039	20.143	25.525	Logarithmic	?
82	(Hex)1 (HexNAc)3 (NeuAc)2 + (Man)3(GlcNAc)2	Complex Bi	Ambiguous	BLF	1132.04	2266.09	2265.83	C86H143O62N7	0.269321	-2	[M-2H]	27.5	6.48	5	5.5	CA_BLFLAD_NG_270917	2052	20.115	25.444	Logarithmic	N
84	(Hex)1 (HexNAc)2 (NeuAc)1 + (Man)3(GlcNAc)2	Complex Bi	Ambiguous	BLF	884.88	1771.77	1771.65	C67H113O49N5	0.124114	-2	[M-2H]	27.6	6.52787	5	5.5	CA_BLFLAD_NG_270917	2056	20.115	25.444	Logarithmic	N
85	(Hex)2 (HexNAc)2 + (Man)3(GlcNAc)2	Complex Bi	Ambiguous	BLF	820.36	1642.73	1642.61	C62H106O46N4	0.126708	-2	[M-2H]	27.7	6.55	5	5	CA_BLFLAD_NG_270917	2050	20.115	25.444	Logarithmic	N
86	(Hex)1 (HexNAc)2 + (Man)3(GlcNAc)2	Complex Bi	Ambiguous	BLF	739.35	1480.71	1480.56	C56H96O41N4	0.159533	-2	[M-2H]	27.8	6.57	5	5	CA_BLFLAD_NG_270917	2059	20.115	25.444	Logarithmic	N
89	(Hex)2 (HexNAc)2 (NeuAc)1 (NeuGc)1 + (Man)3(GlcNAc)2	Complex Bi	Ambiguous	Fet	1119.58	2241.17	2240.79	C84H140O63N6	0.380955	-2	[M-2H]	27.4	6.64	5	5.5	CA_FetLAD_NG_270917	2082	20.285	25.446	Logarithmic	N
99	(Hex)1 (HexNAc)2 (Deoxyhexose)1 (NeuAc)1 + (Man)3(GlcNAc)2	Complex Bi	Ambiguous	BLF	957.94	1917.89	1917.71	C73H123O53N5	0.186204	-2	[M-2H]	28.3	6.7	5	5.5	CA_BLFLAD_NG_270917	2098	20.115	25.444	Logarithmic	Core
95	(Hex)2 (HexNAc)2 (NeuAc)2 + (Man)3(GlcNAc)2	Complex Bi	G18290SV	BLF	1111.5	2225.01	2224.8	C84H140O62N6	0.21587	-2	[M-2H]	28.5	6.75	5	5.5	CA_BLFLAD_NG_270917	2118	20.115	25.444	Logarithmic	N
108	(Hex)2 (HexNAc)2 (Deoxyhexose)1 (NeuAc)1 + (Man)3(GlcNAc)2	Complex Bi	Ambiguous	HLF	1038.95	2079.91	2079.76	C79H133O58N5	0.153379	-2	[M-2H]	28.6	6.76	5	5.5	CA_HLFLAD_NG_270917	2129	20.143	25.525	Logarithmic	Outer
113	(Hex)2 (HexNAc)2 (Deoxyhexose)1 + (Man)3(GlcNAc)2	Complex Bi	Ambiguous	HLF	893.39	1788.79	1788.67	C68H116O50N4	0.128798	-2	[M-2H]	28.8	6.8	5	5	CA_HLFLAD_NG_270917	2154	20.143	25.525	Logarithmic	Outer
102	(Hex)1 (HexNAc)2 + (Man)3(GlcNAc)2	Complex Bi	G23025EY	BLF	739.35	1480.71	1480.56	C56H96O41N4	0.159533	-2	[M-2H]	29.2	6.94	5	5	CA_BLFLAD_NG_270917	2160	20.115	25.444	Logarithmic	N
103	(Hex)2 (HexNAc)2 (NeuAc)1 + (Man)3(GlcNAc)2	Complex Bi	Ambiguous	Fet	966.04	1934.09	1933.7	C73H123O54N5	0.391289	-2	[M-2H]	28.1	7	5	5.5	CA_FetLAD_NG_270917	2142	20.285	25.446	Logarithmic	N
106	(Hex)2 (HexNAc)2 (NeuAc)1 + (Man)3(GlcNAc)2	Complex Bi	G70119NP	BLF	965.94	1933.89	1933.7	C73H123O54N5	0.191289	-2	[M-2H]	29.6	7.07	5	5.5	CA_BLFLAD_NG_270917	2194	20.115	25.444	Logarithmic	N
121	(Hex)2 (HexNAc)2 (Deoxyhexose)1 + (Man)3(GlcNAc)2	Complex Bi	Ambiguous	HLF	893.39	1788.79	1788.67	C68H116O50N4	0.128798	-2	[M-2H]	30.1	7.16	5	5	CA_HLFLAD_NG_270917	2247	20.143	25.525	Logarithmic	Outer
109	(Hex)1 (HexNAc)2 + (Man)3(GlcNAc)2	Complex Bi	Ambiguous	IgA	739.35	1480.71	1480.56	C56H96O41N4	0.159533	-2	[M-2H]	29.8	7.17	5	5	CA_igaLAD_NG_270917	2185	20.285	25.446	Logarithmic	N
116	(HexNAc)2 (Deoxyhexose)1 + (Man)3(GlcNAc)2	Complex Bi	G84053BQ	IgA	731.32	1464.65	1464.56	C56H96O40N4	0.094448	-2	[M-2H]	30.2	7.26	5	5	CA_igaLAD_NG_270917	2213	20.285	25.446	Logarithmic	Core
118	(Hex)1 (HexNAc)2 (Deoxyhexose)1 + (Man)3(GlcNAc)2	Complex Bi	G57435DB	BLF	812.36	1626.73	1626.61	C62H106O45N4	0.121623	-2	[M-2H]	30.3	7.26	5	5	CA_BLFLAD_NG_270917	2242	20.115	25.444	Logarithmic	Core
114	(Hex)3 (HexNAc)3 + (Man)3(GlcNAc)2	Complex Bi	Ambiguous	IgA	1002.95	2007.91	2007.74	C76H129O56N5	0.174509	-2	[M-2H]	30.4	7.33	5	5	CA_igaLAD_NG_270917	2231	20.285	25.446	Logarithmic	N
117	(Hex)1 (HexNAc)2 (Deoxyhexose)1 (NeuAc)1 + (Man)3(GlcNAc)2	Complex Bi	Ambiguous	IgA	957.94	1917.89	1917.71	C73H123O53N5	0.186204	-2	[M-2H]	30.6	7.38	5	5.5	CA_igaLAD_NG_270917	2242	20.285	25.446	Logarithmic	Core
137	(HexNAc)2 (Deoxyhexose)1 + (Man)3(GlcNAc)2	Complex Bi	Ambiguous	BLF	731.32	1464.65	1464.56	C56H96O40N4	0.094448	-2	[M-2H]	31.4	7.58	5	5	CA_BLFLAD_NG_270917	2335	20.115	25.444	Logarithmic	Core
124	(Hex)2 (HexNAc)2 + (Man)3(GlcNAc)2	Complex Bi	G59917BF	BLF	820.36	1642.73	1642.61	C62H106O46N4	0.126708	-2	[M-2H]	31.4	7.58	5	5	CA_BLFLAD_NG_270917	2313	20.115	25.444	Logarithmic	N
140	(Hex)2 (HexNAc)2 (Deoxyhexose)1 (NeuAc)2 + (Man)3(GlcNAc)2	Complex Bi	Ambiguous	HLF	1184.52	2371.05	2370.86	C90H150O66N6	0.19796	-2	[M-2H]	32.3	7.8	5	5.5	CA_HLFLAD_NG_270917	2406	20.143	25.525	Logarithmic	Outer
132	(Hex)2 (HexNAc)2 + (Man)3(GlcNAc)2	Complex Bi	Ambiguous	BLF	820.36	1642.73	1642.61	C62H106O46N4	0.126708	-2	[M-2H]	32.4	7.89	5	5	CA_BLFLAD_NG_270917	2394	20.115	25.444	Logarithmic	N
146	(Hex)2 (HexNAc)2 (Deoxyhexose)3 + (Man)3(GlcNAc)2	Complex Bi	G76782BU	HLF	1039.46	2080.93	2080.78	C80H136O58N4	0.152978	-2	[M-2H]	32.9	7.98	5	5	CA_HLFLAD_NG_270917	2450	20.143	25.525	Logarithmic	Both
147	(Hex)2 (HexNAc)2 (Deoxyhexose)2 (NeuAc)1 + (Man)3(GlcNAc)2	Complex Bi	Ambiguous	HLF	1112.01	2226.03	2225.82	C85H143O62N5	0.215469	-2	[M-2H]	33	8	5	5.5	CA_HLFLAD_NG_270917	2451	20.143	25.525	Logarithmic	Both
142	(Hex)3 (HexNAc)2 (NeuAc)1 + (Man)3(GlcNAc)2	Complex Bi	G50799TU	BLF	1046.97	2095.95	2095.76	C79H133O59N5	0.198464	-2	[M-2H]	33.3	8.15	5	5.5	CA_BLFLAD_NG_270917	2451	20.115	25.444	Logarithmic	N
144	(Hex)2 (HexNAc)2 + (Man)3(GlcNAc)2	Complex Bi	Ambiguous	IgA	820.36	1642.73	1642.61	C62H106O46N4	0.126708	-2	[M-2H]	33.2	8.19	5	5	CA_igaLAD_NG_270917	2421	20.285	25.446	Logarithmic	N
145	(Hex)2 (HexNAc)2 (Deoxyhexose)1 (NeuAc)1 + (Man)3(GlcNAc)2	Complex Bi	G26204QU	IgA	1038.95	2079.91	2079.76	C79H133O58N5	0.153379	-2	[M-2H]	33.2	8.19	5	5.5	CA_igaLAD_NG_270917	2428	20.285	25.446	Logarithmic	Core
148	(Hex)1 (HexNAc)2 (Deoxyhexose)1 + (Man)3(GlcNAc)2	Complex Bi	Ambiguous	BLF	812.36	1626.73	1626.61	C62H106O45N4	0.121623	-2	[M-2H]	33.6	8.26	5	5	CA_BLFLAD_NG_270917	2477	20.115	25.444	Logarithmic	Core
153	(Hex)2 (HexNAc)2 (Deoxyhexose)1 (NeuAc)1 + (Man)3(GlcNAc)2	Complex Bi	Ambiguous	BLF	1038.95	2079.91	2079.76	C79H133O58N5	0.153379	-2	[M-2H]	33.9	8.34	5	5.5	CA_BLFLAD_NG_270917	2495	20.115	25.444	Logarithmic	Core
155	(Hex)2 (HexNAc)2 (Deoxyhexose)2 + (Man)3(GlcNAc)2	Complex Bi	Ambiguous	HLF	966.42	1934.85	1934.72	C74H126O54N4	0.130888	-2	[M-2H]	34.2	8.41	5	5	CA_HLFLAD_NG_270917	2544	20.143	25.525	Logarithmic	Both
156	(Hex)1 (HexNAc)2 (Deoxyhexose)1 + (Man)3(GlcNAc)2	Complex Bi	Ambiguous	HLF	812.37	1626.75	1626.61	C62H106O45N4	0.141623	-2	[M-2H]	34.8	8.58	5	5	CA_HLFLAD_NG_270917	2579	20.143	25.525	Logarithmic	?
161	(Hex)2 (HexNAc)2 (Deoxyhexose)3 (NeuAc)1 + (Man)3(GlcNAc)2	Complex Bi	Ambiguous	HLF	1185.06	2372.13	2371.88	C91H153O66N5	0.257559	-2	[M-2H]	35	8.69	5	5.5	CA_HLFLAD_NG_270917	2609	20.143	25.525	Logarithmic	Both
164	(Hex)2 (HexNAc)2 (Deoxyhexose)1 (NeuAc)1 + (Man)3(GlcNAc)2	Complex Bi	Ambiguous	HLF	1038.95	2079.91	2079.76	C79H133O58N5	0.153379	-2	[M-2H]	35.2	8.74	5	5.5	CA_HLFLAD_NG_270917	2617	20.143	25.525	Logarithmic	Core
159	(Hex)2 (HexNAc)2 (NeuAc)1 + (Man)3(GlcNAc)2	Complex Bi	Ambiguous	Fet	966.04	1934.09	1933.7	C73H123O54N5	0.391289	-2	[M-2H]	31.5	8.77	5	5.5	CA_FetLAD_NG_270917	2353	20.285	25.446	Logarithmic	N
166	(Hex)2 (HexNAc)2 (Deoxyhexose)2 + (Man)3(GlcNAc)2	Complex Bi	Ambiguous	HLF	966.42	1934.85	1934.72	C74H126O54N4	0.130888	-2	[M-2H]	35.4	8.8	5	5	CA_HLFLAD_NG_270917	2628	20.143	25.525	Logarithmic	Both
163	(Hex)3 (HexNAc)2 + (Man)3(GlcNAc)2	Complex Bi	Ambiguous	BLF	901.35	1804.71	1804.66	C68H116O51N4	0.053883	-2	[M-2H]	35.5	8.9	5	5	CA_BLFLAD_NG_270917	2625	20.115	25.444	Logarithmic	N
170	(Hex)2 (HexNAc)2 (Deoxyhexose)1 + (Man)3(GlcNAc)2	Complex Bi	Ambiguous	BLF	893.39	1788.79	1788.67	C68H116O50N4	0.128798	-2	[M-2H]	36.5	9.26	5	5	CA_BLFLAD_NG_270917	2685	20.115	25.444	Logarithmic	Core
174	(Hex)1 (HexNAc)2 + (Man)3(GlcNAc)2	Complex Bi	G21731DB	IgG	739.35	1480.71	1480.56	C56H96O41N4	0.159533	-2	[M-2H]	36.8	9.51	5	5	CA_iggLAD_NG_270917	2746	20.245	25.337	Logarithmic	N
177	(Hex)3 (HexNAc)2 + (Man)3(GlcNAc)2	Complex Bi	Ambiguous	IgA	901.35	1804.71	1804.66	C68H116O51N4	0.053883	-2	[M-2H]	37.6	9.73	5	5	CA_igaLAD_NG_270917	2734	20.285	25.446	Logarithmic	N
180	(Hex)2 (HexNAc)2 (NeuAc)2 + (Man)3(GlcNAc)2	Complex Bi	G18290SV	Fet	1111.6	2225.21	2224.8	C84H140O62N6	0.41587	-2	[M-2H]	27.4	9.87	5	5.5	CA_FetLAD_NG_270917	2507	20.285	25.446	Logarithmic	N
185	(Hex)4 (HexNAc)2 + (Man)3(GlcNAc)2	Complex Bi	G63909HB	BLF	982.38	1966.77	1966.71	C74H126O56N4	0.061058	-2	[M-2H]	39.4	10.39	5	5	CA_BLFLAD_NG_270917	2897	20.115	25.444	Logarithmic	N
1	(HexNAc)1 + (Man)3(GlcNAc)2	Complex Mono	G48421GV	IgA	1114.52	1115.53	1115.42	C42H73O31N3	0.10446	-1	[M-H]-	10.9	3.4	4	4	CA_igaLAD_NG_270917	805	20.285	25.446	Logarithmic	N
4	(HexNAc)1 + (Man)3(GlcNAc)2	Complex Mono	G48522XQ	IgA	1114.52	1115.53	1115.42	C42H73O31N3	0.10446	-1	[M-H]-	14.6	3.57	4	4	CA_igaLAD_NG_270917	1089	20.285	25.446	Logarithmic	N
7	(Hex)1 (HexNAc)2 + (Man)3(GlcNAc)2	Complex Mono	G50392AV	IgA	739.35	1480.71	1480.56	C56H96O41N4	0.159533	-2	[M-2H]	17.6	3.57	4	4	CA_igaLAD_NG_270917	1305	20.285	25.446	Logarithmic	N
11	(HexNAc)2 + (Man)3(GlcNAc)2	Complex Mono	G50071YW	IgA	1317.59	1318.6	1318.5	C50H86O36N4	0.095086	-1	[M-H]-	18.1	4.53	4	4	CA_igaLAD_NG_270917	1356	20.285	25.446	Logarithmic	N
23	(Hex)1 (HexNAc)1 + (Man)3(GlcNAc)2	Complex Mono	G87422MU	BLF	1276.56	1277.57	1277.48	C48H83O36N3	0.091635	-1	[M-H]-	21.7	5.17	4	4	CA_BLFLAD_NG_270917	1614	20.115	25.444	Logarithmic	N
27	(HexNAc)1 + (Man)3(GlcNAc)2	Complex Mono	Unspecified	HNE	1114.52	1115.53	1115.42	C42H73O31N3	0.10446	-1	[M-H]-	22.1	5.29	4	4	CA_HNELAD_NG_270917	1221	18.582	24.447	Logarithmic	N
37	(Hex)1 (HexNAc)2 (NeuAc)1 + (Man)3(GlcNAc)2	Complex Mono	Ambiguous	BLF	884.88	1771.77	1771.65	C67H113O49N5	0.124114	-2	[M-2H]	23.7	5.5958	4	4.5	CA_BLFLAD_NG_270917	1767	20.115	25.444	Logarithmic	N
39	(HexNAc)1 + (Man)3(GlcNAc)2	Complex Mono	Ambiguous	HNE	1114.52	1115.53	1115.42	C42H73O31N3	0.10446	-1	[M-H]-	23.6	5.62	4	4	CA_HNELAD_NG_270917	1337	18.582	24.447	Logarithmic	N
63	(Hex)1 (HexNAc)1 (NeuAc)1 + (Man)3(GlcNAc)2	Complex Mono	Unspecified	BLF	783.33	1568.67	1568.57	C59H100O44N4	0.103488	-2	[M-2H]	26	6.11	4	4.5	CA_BLFLAD_NG_270917	1932	20.115	25.444	Logarithmic	N
78	(Hex)1 (HexNAc)2 (Deoxyhexose)1 + (Man)3(GlcNAc)2	Complex Mono	G48422CN	HLF	812.37	1626.75	1626.61	C62H106O45N4	0.141623	-2	[M-2H]	26.4	6.19	4	4	CA_HLFLAD_NG_270917	1969	20.143	25.525	Logarithmic	Outer
75	(HexNAc)1 + (Man)3(GlcNAc)2	Complex Mono	Ambiguous	HNE	1114.52	1115.53	1115.42	C42H73O31N3	0.10446	-1	[M-H]-	26.5	6.33	4	4	CA_HNELAD_NG_270917	1565	18.582	24.447	Logarithmic	N
76	(Hex)1 (HexNAc)1 + (Man)3(GlcNAc)2	Complex Mono	Ambiguous	BLF	1276.56	1277.57	1277.48	C48H83O36N3	0.091635	-1	[M-H]-	26.9	6.34	4	4	CA_BLFLAD_NG_270917	1998	20.115	25.444	Logarithmic	N
112	(HexNAc)1 (Deoxyhexose)1 + (Man)3(GlcNAc)2	Complex Mono	Ambiguous	IgG	1260.54	1261.55	1261.48	C48H83O35N3	0.06655	-1	[M-H]-	28.6	6.86	4	4	CA_iggLAD_NG_270917	2146	20.245	25.337	Logarithmic	Core
111	(HexNAc)1 + (Man)3(GlcNAc)2	Complex Mono	Ambiguous	IgA	1114.52	1115.53	1115.42	C42H73O31N3	0.10446	-1	[M-H]-	30	7.22	4	4	CA_igaLAD_NG_270917	2206	20.285	25.446	Logarithmic	N
130	(Hex)1 (HexNAc)1 (Deoxyhexose)1 (NeuAc)1 + (Man)3(GlcNAc)2	Complex Mono	Ambiguous	HLF	856.36	1714.73	1714.63	C65H110O48N4	0.105578	-2	[M-2H]	30.9	7.39	4	4.5	CA_HLFLAD_NG_270917	2299	20.143	25.525	Logarithmic	Core
129	(Hex)1 (HexNAc)1 (NeuAc)1 + (Man)3(GlcNAc)2	Complex Mono	Ambiguous	HNE	783.33	1568.67	1568.57	C59H100O44N4	0.103488	-2	[M-2H]	25.6	7.77	4	4.5	CA_HNELAD_NG_270917	1943	18.582	24.447	Logarithmic	N
135	(Hex)1 (HexNAc)1 + (Man)3(GlcNAc)2	Complex Mono	Ambiguous	BLF	1276.56	1277.57	1277.48	C48H83O36N3	0.091635	-1	[M-H]-	32.7	7.97	4	4	CA_BLFLAD_NG_270917	2412	20.115	25.444	Logarithmic	N
139	(Hex)1 (HexNAc)1 + (Man)3(GlcNAc)2	Complex Mono	Ambiguous	IgA	1276.56	1277.57	1277.48	C48H83O36N3	0.091635	-1	[M-H]-	32.6	8	4	4	CA_igaLAD_NG_270917	2379	20.285	25.446	Logarithmic	N
97	(HexNAc)1 (Deoxyhexose)1 + (Man)3(GlcNAc)2	Complex Mono	Ambiguous	HNE	1260.61	1261.62	1261.48	C48H83O35N3	0.13655	-1	[M-H]-	33	8.24	4	4	CA_HNELAD_NG_270917	2041	18.582	24.447	Logarithmic	Core
125	(Hex)1 (HexNAc)1 (Deoxyhexose)1 (NeuAc)1 + (Man)3(GlcNAc)2	Complex Mono	G23031BI	HNE	856.4	1714.81	1714.63	C65H110O48N4	0.185578	-2	[M-2H]	30.2	9.32	4	4.5	CA_HNELAD_NG_270917	2268	18.582	24.447	Logarithmic	Core
172	(HexNAc)1 (Deoxyhexose)1 + (Man)3(GlcNAc)2	Complex Mono	Ambiguous	IgG	1260.54	1261.55	1261.48	C48H83O35N3	0.06655	-1	[M-H]-	36.6	9.42	4	4	CA_iggLAD_NG_270917	2728	20.245	25.337	Logarithmic	Core
35	(Hex)2 (HexNAc)3 + (Man)3(GlcNAc)2	Complex Tri	G28183PJ	IgA	921.91	1845.83	1845.69	C70H119O51N5	0.147334	-2	[M-2H]	23.3	5.55	6	6	CA_igaLAD_NG_270917	1722	20.285	25.446	Logarithmic	N
55	(Hex)1 (HexNAc)3 (Deoxyhexose)1 (NeuAc)1 + (Man)3(GlcNAc)2	Complex Tri	Ambiguous	IgA	1059.47	2120.95	2120.79	C81H136O58N6	0.16683	-2	[M-2H]	24.4	5.79	6	6.5	CA_igaLAD_NG_270917	1806	20.285	25.446	Logarithmic	Core
54	(Hex)1 (HexNAc)3 + (Man)3(GlcNAc)2	Complex Tri	G96832KC	IgA	840.86	1683.73	1683.63	C64H109O46N5	0.100159	-2	[M-2H]	24.8	5.89	6	6	CA_igaLAD_NG_270917	1841	20.285	25.446	Logarithmic	N
67	(Hex)1 (HexNAc)3 (Deoxyhexose)1 (NeuAc)1 + (Man)3(GlcNAc)2	Complex Tri	Ambiguous	IgA	1059.47	2120.95	2120.79	C81H136O58N6	0.16683	-2	[M-2H]	24.9	5.9208	6	6.5	CA_igaLAD_NG_270917	1846	20.285	25.446	Logarithmic	Core
60	(Hex)1 (HexNAc)3 + (Man)3(GlcNAc)2	Complex Tri	Ambiguous	IgA	840.86	1683.73	1683.63	C64H109O46N5	0.100159	-2	[M-2H]	25.3	6.01	6	6	CA_igaLAD_NG_270917	1879	20.285	25.446	Logarithmic	N
70	(Hex)2 (HexNAc)3 (Deoxyhexose)1 (NeuAc)2 + (Man)3(GlcNAc)2	Complex Tri	Ambiguous	IgG	1286.07	2574.15	2573.94	C98H163O71N7	0.218586	-2	[M-2H]	25.7	6.13	6	6.5	CA_iggLAD_NG_270917	1938	20.245	25.337	Logarithmic	?
77	(Hex)2 (HexNAc)3 (Deoxyhexose)1 (NeuAc)1 + (Man)3(GlcNAc)2	Complex Tri	Ambiguous	IgA	1140.53	2283.07	2282.84	C87H146O63N6	0.234005	-2	[M-2H]	26.2	6.21	6	6.5	CA_igaLAD_NG_270917	1939	20.285	25.446	Logarithmic	Outer
83	(Hex)2 (HexNAc)3 (Deoxyhexose)1 (NeuAc)1 + (Man)3(GlcNAc)2	Complex Tri	Ambiguous	IgA	1140.53	2283.07	2282.84	C87H146O63N6	0.234005	-2	[M-2H]	27	6.42	6	6.5	CA_igaLAD_NG_270917	1987	20.285	25.446	Logarithmic	Core
90	(HexNAc)3 (Deoxyhexose)1 + (Man)3(GlcNAc)2	Complex Tri	G27196XM	IgA	832.89	1667.79	1667.64	C64H109O45N5	0.155074	-2	[M-2H]	27.3	6.48	6	6	CA_igaLAD_NG_270917	2003	20.285	25.446	Logarithmic	Core
88	(HexNAc)3 + (Man)3(GlcNAc)2	Complex Tri	Ambiguous	BLF	759.86	1521.73	1521.58	C58H99O41N5	0.152984	-2	[M-2H]	28	6.62	6	6	CA_BLFLAD_NG_270917	2075	20.115	25.444	Logarithmic	N
91	(Hex)1 (HexNAc)3 (NeuAc)1 + (Man)3(GlcNAc)2	Complex Tri	Ambiguous	BLF	986.44	1974.89	1974.73	C75H126O54N6	0.16474	-2	[M-2H]	28.3	6.7	6	6.5	CA_BLFLAD_NG_270917	2091	20.115	25.444	Logarithmic	N
94	(HexNAc)3 + (Man)3(GlcNAc)2	Complex Tri	Ambiguous	BLF	759.86	1521.73	1521.58	C58H99O41N5	0.152984	-2	[M-2H]	28.4	6.73	6	6	CA_BLFLAD_NG_270917	2111	20.115	25.444	Logarithmic	N
93	(Hex)2 (HexNAc)3 + (Man)3(GlcNAc)2	Complex Tri	G84440YT	IgA	921.91	1845.83	1845.69	C70H119O51N5	0.147334	-2	[M-2H]	28.2	6.73	6	6	CA_igaLAD_NG_270917	2081	20.285	25.446	Logarithmic	N
98	(Hex)2 (HexNAc)3 (Deoxyhexose)1 + (Man)3(GlcNAc)2	Complex Tri	Ambiguous	IgA	994.95	1991.91	1991.75	C76H129O55N5	0.169424	-2	[M-2H]	28.1	6.78	6	6	CA_igaLAD_NG_270917	2063	20.285	25.446	Logarithmic	Core
107	(Hex)1 (HexNAc)3 (NeuAc)1 + (Man)3(GlcNAc)2	Complex Tri	Ambiguous	BLF	986.44	1974.89	1974.73	C75H126O54N6	0.16474	-2	[M-2H]	29.9	7.14	6	6.5	CA_BLFLAD_NG_270917	2213	20.115	25.444	Logarithmic	N
110	(Hex)1 (HexNAc)3 + (Man)3(GlcNAc)2	Complex Tri	G96832KC	BLF	840.86	1683.73	1683.63	C64H109O46N5	0.100159	-2	[M-2H]	30.2	7.21	6	6	CA_BLFLAD_NG_270917	2223	20.115	25.444	Logarithmic	N
115	(HexNAc)4 + (Man)3(GlcNAc)2	Complex Tri	Ambiguous	BLF	861.4	1724.81	1724.66	C66H112O46N6	0.15361	-2	[M-2H]	30.6	7.33	6	6	CA_BLFLAD_NG_270917	2253	20.115	25.444	Logarithmic	N
136	(Hex)1 (HexNAc)3 (Deoxyhexose)1 (NeuAc)1 + (Man)3(GlcNAc)2	Complex Tri	Ambiguous	BLF	1059.47	2120.95	2120.79	C81H136O58N6	0.16683	-2	[M-2H]	34	7.53	6	6.5	CA_BLFLAD_NG_270917	2315	20.115	25.444	Logarithmic	Core
123	(Hex)3 (HexNAc)3 (NeuAc)5 + (Man)3(GlcNAc)2	Complex Tri	Ambiguous	Fet	1153.62	3463.88	3463.22	C131H214O96N10	0.664686	-3	[M-3H]	29.3	7.55	6	6.5	CA_FetLAD_NG_270917	2257	20.285	25.446	Logarithmic	N
126	(Hex)1 (HexNAc)3 + (Man)3(GlcNAc)2	Complex Tri	Ambiguous	BLF	840.86	1683.73	1683.63	C64H109O46N5	0.100159	-2	[M-2H]	31.8	7.7	6	6	CA_BLFLAD_NG_270917	2349	20.115	25.444	Logarithmic	N
127	(Hex)2 (HexNAc)3 (NeuAc)1 + (Man)3(GlcNAc)2	Complex Tri	Ambiguous	BLF	1067.49	2136.99	2136.78	C81H136O59N6	0.211915	-2	[M-2H]	31.9	7.73	6	6.5	CA_BLFLAD_NG_270917	2358	20.115	25.444	Logarithmic	N
128	(Hex)3 (HexNAc)3 (NeuAc)3 + (Man)3(GlcNAc)2	Complex Tri	Ambiguous	Fet	1439.27	2880.55	2881.03	C109H180O80N8	-0.471748	-2	[M-2H]	29.6	7.73	6	6.5	CA_FetLAD_NG_270917	2288	20.285	25.446	Logarithmic	N
131	(Hex)3 (HexNAc)3 (NeuAc)4 + (Man)3(GlcNAc)2	Complex Tri	Ambiguous	Fet	1056.61	3172.85	3172.12	C120H197O88N9	0.730105	-3	[M-3H]	30.1	7.87	6	6.5	CA_FetLAD_NG_270917	2425	20.285	25.446	Logarithmic	N
133	(Hex)1 (HexNAc)4 (NeuAc)1 + (Man)3(GlcNAc)2	Complex Tri	Ambiguous	BLF	1087.99	2177.99	2177.81	C83H139O59N7	0.185366	-2	[M-2H]	32.6	7.91	6	6.5	CA_BLFLAD_NG_270917	2411	20.115	25.444	Logarithmic	N
134	(Hex)3 (HexNAc)3 (NeuAc)4 + (Man)3(GlcNAc)2	Complex Tri	Ambiguous	Fet	1585.42	3172.85	3172.12	C120H197O88N9	0.732833	-2	[M-2H]	33	7.96	6	6.5	CA_FetLAD_NG_270917	2426	20.285	25.446	Logarithmic	N
138	(Hex)1 (HexNAc)3 (Deoxyhexose)1 (NeuAc)1 + (Man)3(GlcNAc)2	Complex Tri	Ambiguous	BLF	1059.47	2120.95	2120.79	C81H136O58N6	0.16683	-2	[M-2H]	32.7	7.97	6	6.5	CA_BLFLAD_NG_270917	2404	20.115	25.444	Logarithmic	Core
143	(HexNAc)4 (Deoxyhexose)1 (NeuAc)1 + (Man)3(GlcNAc)2	Complex Tri	G47140BP	BLF	1079.99	2161.99	2161.81	C83H139O58N7	0.180281	-2	[M-2H]	32.8	7.99	6	6.5	CA_BLFLAD_NG_270917	2410	20.115	25.444	Logarithmic	Core
141	(Hex)3 (HexNAc)3 (NeuAc)2 + (Man)3(GlcNAc)2	Complex Tri	Ambiguous	Fet	1294.28	2590.57	2589.93	C98H163O72N7	0.643671	-2	[M-2H]	29.8	8.01	6	6.5	CA_FetLAD_NG_270917	2346	20.285	25.446	Logarithmic	N
154	(Hex)1 (HexNAc)3 (Deoxyhexose)2 + (Man)3(GlcNAc)2	Complex Tri	Ambiguous	HLF	986.93	1975.87	1975.75	C76H129O54N5	0.124339	-2	[M-2H]	33.8	8.27	6	6	CA_HLFLAD_NG_270917	2515	20.143	25.525	Logarithmic	?
151	(Hex)3 (HexNAc)3 (NeuAc)1 + (Man)3(GlcNAc)2	Complex Tri	Ambiguous	HNE	1148.55	2299.11	2298.84	C87H146O64N6	0.27909	-2	[M-2H]	33.6	8.44	6	6.5	CA_HNELAD_NG_270917	2087	18.582	24.447	Logarithmic	N
152	(Hex)2 (HexNAc)3 + (Man)3(GlcNAc)2	Complex Tri	Ambiguous	BLF	921.91	1845.83	1845.69	C70H119O51N5	0.147334	-2	[M-2H]	34.2	8.45	6	6	CA_BLFLAD_NG_270917	2523	20.115	25.444	Logarithmic	N
149	(Hex)1 (HexNAc)3 (Deoxyhexose)2 + (Man)3(GlcNAc)2	Complex Tri	Ambiguous	IgA	986.93	1975.87	1975.75	C76H129O54N5	0.124339	-2	[M-2H]	34.3	8.56	6	6	CA_igaLAD_NG_270917	2490	20.285	25.446	Logarithmic	?
157	(Hex)3 (HexNAc)3 + (Man)3(GlcNAc)2	Complex Tri	Ambiguous	IgA	1002.95	2007.91	2007.74	C76H129O56N5	0.174509	-2	[M-2H]	34.8	8.71	6	6	CA_igaLAD_NG_270917	2536	20.285	25.446	Logarithmic	N
158	(Hex)1 (HexNAc)3 (Deoxyhexose)1 + (Man)3(GlcNAc)2	Complex Tri	Ambiguous	BLF	913.91	1829.83	1829.69	C70H119O50N5	0.142249	-2	[M-2H]	35.3	8.82	6	6	CA_BLFLAD_NG_270917	2602	20.115	25.444	Logarithmic	Core
160	(HexNAc)4 (Deoxyhexose)1 + (Man)3(GlcNAc)2	Complex Tri	Ambiguous	BLF	934.42	1870.85	1870.72	C72H122O50N6	0.1357	-2	[M-2H]	35.4	8.88	6	6	CA_BLFLAD_NG_270917	2608	20.115	25.444	Logarithmic	Core
167	(Hex)2 (HexNAc)3 (Deoxyhexose)1 (NeuAc)1 + (Man)3(GlcNAc)2	Complex Tri	Ambiguous	BLF	1140.53	2283.07	2282.84	C87H146O63N6	0.234005	-2	[M-2H]	35.9	9.02	6	6.5	CA_BLFLAD_NG_270917	2635	20.115	25.444	Logarithmic	Core
165	(Hex)3 (HexNAc)3 (NeuAc)2 + (Man)3(GlcNAc)2	Complex Tri	Ambiguous	Fet	1294.28	2590.57	2589.93	C98H163O72N7	0.643671	-2	[M-2H]	32	9.03	6	6.5	CA_FetLAD_NG_270917	2384	20.285	25.446	Logarithmic	N
162	(Hex)3 (HexNAc)3 (Deoxyhexose)1 (NeuAc)1 + (Man)3(GlcNAc)2	Complex Tri	Ambiguous	IgA	1221.54	2445.09	2444.89	C93H156O68N6	0.20118	-2	[M-2H]	35.9	9.07	6	6.5	CA_igaLAD_NG_270917	2617	20.285	25.446	Logarithmic	Outer
168	(Hex)1 (HexNAc)3 (Deoxyhexose)2 + (Man)3(GlcNAc)2	Complex Tri	Ambiguous	IgA	986.93	1975.87	1975.75	C76H129O54N5	0.124339	-2	[M-2H]	36.1	9.19	6	6	CA_igaLAD_NG_270917	2639	20.285	25.446	Logarithmic	?
169	(Hex)1 (HexNAc)3 (Deoxyhexose)3 (NeuAc)1 + (Man)3(GlcNAc)2	Complex Tri	Ambiguous	IgA	1205.53	2413.07	2412.9	C93H156O66N6	0.17101	-2	[M-2H]	36.7	9.34	6	6.5	CA_igaLAD_NG_270917	2683	20.285	25.446	Logarithmic	?
171	(Hex)3 (HexNAc)3 (NeuAc)3 + (Man)3(GlcNAc)2	Complex Tri	Ambiguous	Fet	1439.27	2880.55	2881.03	C109H180O80N8	-0.471748	-2	[M-2H]	32.6	9.42	6	6.5	CA_FetLAD_NG_270917	2468	20.285	25.446	Logarithmic	N
173	(Hex)2 (HexNAc)3 + (Man)3(GlcNAc)2	Complex Tri	Ambiguous	IgA	921.91	1845.83	1845.69	C70H119O51N5	0.147334	-2	[M-2H]	37	9.5	6	6	CA_igaLAD_NG_270917	2697	20.285	25.446	Logarithmic	N
175	(Hex)3 (HexNAc)3 + (Man)3(GlcNAc)2	Complex Tri	Ambiguous	IgA	1002.95	2007.91	2007.74	C76H129O56N5	0.174509	-2	[M-2H]	37.1	9.53	6	6	CA_igaLAD_NG_270917	2700	20.285	25.446	Logarithmic	N
176	(Hex)3 (HexNAc)3 (NeuAc)2 (NeuGc)2 + (Man)3(GlcNAc)2	Complex Tri	Ambiguous	Fet	1067.25	3204.77	3204.11	C120H197O90N9	0.660275	-3	[M-3H]	32.8	9.58	6	6.5	CA_FetLAD_NG_270917	2435	20.285	25.446	Logarithmic	N
182	(Hex)1 (HexNAc)3 (Deoxyhexose)3 + (Man)3(GlcNAc)2	Complex Tri	Ambiguous	HLF	1059.99	2121.99	2121.81	C82H139O58N5	0.186429	-2	[M-2H]	37.9	9.74	6	6	CA_HLFLAD_NG_270917	2820	20.143	25.525	Logarithmic	Both
179	(Hex)3 (HexNAc)3 (NeuAc)2 + (Man)3(GlcNAc)2	Complex Tri	Ambiguous	Fet	1294.28	2590.57	2589.93	C98H163O72N7	0.643671	-2	[M-2H]	33.2	9.82	6	6.5	CA_FetLAD_NG_270917	2413	20.285	25.446	Logarithmic	N
181	(Hex)3 (HexNAc)3 (NeuAc)3 + (Man)3(GlcNAc)2	Complex Tri	Ambiguous	Fet	1439.27	2880.55	2881.03	C109H180O80N8	-0.471748	-2	[M-2H]	34.1	10.07	6	6.5	CA_FetLAD_NG_270917	2483	20.285	25.446	Logarithmic	N
178	(Hex)1 (HexNAc)3 (Deoxyhexose)3 + (Man)3(GlcNAc)2	Complex Tri	Ambiguous	IgA	1059.99	2121.99	2121.81	C82H139O58N5	0.186429	-2	[M-2H]	38.7	10.16	6	6	CA_igaLAD_NG_270917	2817	20.285	25.446	Logarithmic	Core
183	(Hex)3 (HexNAc)3 + (Man)3(GlcNAc)2	Complex Tri	Ambiguous	IgA	1002.95	2007.91	2007.74	C76H129O56N5	0.174509	-2	[M-2H]	39.1	10.33	6	6	CA_igaLAD_NG_270917	2836	20.285	25.446	Logarithmic	N
184	(Hex)1 (HexNAc)3 (Deoxyhexose)3 + (Man)3(GlcNAc)2	Complex Tri	Ambiguous	HLF	1059.99	2121.99	2121.81	C82H139O58N5	0.186429	-2	[M-2H]	39.5	10.34	6	6	CA_HLFLAD_NG_270917	2898	20.143	25.525	Logarithmic	Both
186	(Hex)3 (HexNAc)3 (Deoxyhexose)1 (NeuAc)1 + (Man)3(GlcNAc)2	Complex Tri	Ambiguous	IgA	1221.54	2445.09	2444.89	C93H156O68N6	0.20118	-2	[M-2H]	40.1	10.72	6	6.5	CA_igaLAD_NG_270917	2909	20.285	25.446	Logarithmic	Outer
187	(Hex)3 (HexNAc)3 + (Man)3(GlcNAc)2	Complex Tri	Ambiguous	IgA	1002.95	2007.91	2007.74	C76H129O56N5	0.174509	-2	[M-2H]	40.7	10.97	6	6	CA_igaLAD_NG_270917	2955	20.285	25.446	Logarithmic	N
188	(Hex)3 (HexNAc)3 (NeuAc)3 + (Man)3(GlcNAc)2	Complex Tri	Ambiguous	Fet	1439.27	2880.55	2881.03	C109H180O80N8	-0.471748	-2	[M-2H]	35.4	11.33	6	6.5	CA_FetLAD_NG_270917	2629	20.285	25.446	Logarithmic	N
189	(Hex)3 (HexNAc)3 + (Man)3(GlcNAc)2	Complex Tri	Ambiguous	IgA	1002.95	2007.91	2007.74	C76H129O56N5	0.174509	-2	[M-2H]	41.7	11.42	6	6	CA_igaLAD_NG_270917	3015	20.285	25.446	Logarithmic	N
190	(Hex)3 (HexNAc)3 (NeuAc)2 + (Man)3(GlcNAc)2	Complex Tri	Ambiguous	Fet	1294.28	2590.57	2589.93	C98H163O72N7	0.643671	-2	[M-2H]	36.9	12.56	6	6.5	CA_FetLAD_NG_270917	2719	20.285	25.446	Logarithmic	N
8	(Hex)4 (HexNAc)2	High mannose	G85626DA	BLF	1073.46	1074.47	1074.4	C40H70O31N2	0.071009	-1	[M-H]-	18.1	3.57	1	1	CA_BLFLAD_NG_270917	1345	20.115	25.444	Logarithmic	N
18	(Hex)2 + (Man)3(GlcNAc)2	High mannose	Ambiguous	IgA	1235.58	1236.59	1236.45	C46H80O36N2	0.138184	-1	[M-H]-	20.4	4.94	1	1	CA_igaLAD_NG_270917	1517	20.285	25.446	Logarithmic	N
38	(Hex)4 (HexNAc)2	High mannose	Ambiguous	BLF	1073.46	1074.47	1074.4	C40H70O31N2	0.071009	-1	[M-H]-	23.7	5.6	1	1	CA_BLFLAD_NG_270917	1768	20.115	25.444	Logarithmic	N
40	(Hex)4 + (Man)3(GlcNAc)2	High mannose	Ambiguous	BLF	779.34	1560.69	1560.55	C58H100O46N2	0.139806	-2	[M-2H]	24	5.67	1	1	CA_BLFLAD_NG_270917	1800	20.115	25.444	Logarithmic	N
41	(Hex)5 + (Man)3(GlcNAc)2	High mannose	Ambiguous	BLF	860.4	1722.81	1722.61	C64H110O51N2	0.206981	-2	[M-2H]	24	5.69	1	1	CA_BLFLAD_NG_270917	1822	20.115	25.444	Logarithmic	N
44	(Hex)4 + (Man)3(GlcNAc)2	High mannose	Ambiguous	BLF	779.34	1560.69	1560.55	C58H100O46N2	0.139806	-2	[M-2H]	24.5	5.78	1	1	CA_BLFLAD_NG_270917	1813	20.115	25.444	Logarithmic	N
47	(Hex)3 + (Man)3(GlcNAc)2	High mannose	G19949UL	BLF	1397.65	1398.66	1398.5	C52H90O41N2	0.155359	-1	[M-H]-	24.6	5.8	1	1	CA_BLFLAD_NG_270917	1831	20.115	25.444	Logarithmic	N
48	(Hex)5 + (Man)3(GlcNAc)2	High mannose	G91089ZR	BLF	860.4	1722.81	1722.61	C64H110O51N2	0.206981	-2	[M-2H]	24.7	5.82	1	1	CA_BLFLAD_NG_270917	1846	20.115	25.444	Logarithmic	N
50	(Hex)6 + (Man)3(GlcNAc)2	High mannose	G66257KQ	BLF	941.44	1884.89	1884.66	C70H120O56N2	0.234156	-2	[M-2H]	24.9	5.85	1	1	CA_BLFLAD_NG_270917	1843	20.115	25.444	Logarithmic	N
53	(Hex)4 + (Man)3(GlcNAc)2	High mannose	Ambiguous	BLF	779.34	1560.69	1560.55	C58H100O46N2	0.139806	-2	[M-2H]	24.9	5.86	1	1	CA_BLFLAD_NG_270917	1858	20.115	25.444	Logarithmic	N
57	(Hex)4 (HexNAc)2	High mannose	Ambiguous	BLF	1073.46	1074.47	1074.4	C40H70O31N2	0.071009	-1	[M-H]-	25.3	5.96	1	1	CA_BLFLAD_NG_270917	1885	20.115	25.444	Logarithmic	N
58	(Hex)5 + (Man)3(GlcNAc)2	High mannose	G84170WO	BLF	860.4	1722.81	1722.61	C64H110O51N2	0.206981	-2	[M-2H]	25.3	5.96	1	1	CA_BLFLAD_NG_270917	1878	20.115	25.444	Logarithmic	N
62	(Hex)4 + (Man)3(GlcNAc)2	High mannose	Ambiguous	CBHI	779.34	1560.69	1560.55	C58H100O46N2	0.139806	-2	[M-2H]		6.09	1	1	CA_CBHILAD_NG_270917	1578	18.806	24.601	Logarithmic	N
72	(Hex)2 + (Man)3(GlcNAc)2	High mannose	Ambiguous	BLF	1235.58	1236.59	1236.45	C46H80O36N2	0.138184	-1	[M-H]-	26.6	6.27	1	1	CA_BLFLAD_NG_270917	1978	20.115	25.444	Logarithmic	N
79	(Hex)4 + (Man)3(GlcNAc)2	High mannose	Ambiguous	BLF	779.34	1560.69	1560.55	C58H100O46N2	0.139806	-2	[M-2H]	27.2	6.42	1	1	CA_BLFLAD_NG_270917	2019	20.115	25.444	Logarithmic	N
81	(Hex)5 + (Man)3(GlcNAc)2	High mannose	Ambiguous	CBHI	860.4	1722.81	1722.61	C64H110O51N2	0.206981	-2	[M-2H]		6.47	1	1	CA_CBHILAD_NG_270917	1608	18.806	24.601	Logarithmic	N
104	(Hex)2 + (Man)3(GlcNAc)2	High mannose	Ambiguous	BLF	1235.58	1236.59	1236.45	C46H80O36N2	0.138184	-1	[M-H]-	29.4	7	1	1	CA_BLFLAD_NG_270917	2170	20.115	25.444	Logarithmic	N
105	(Hex)4 (HexNAc)2	High mannose	Ambiguous	IgA	1073.46	1074.47	1074.4	C40H70O31N2	0.071009	-1	[M-H]-	29.4	7.05	1	1	CA_igaLAD_NG_270917	2167	20.285	25.446	Logarithmic	N
119	(Hex)2 + (Man)3(GlcNAc)2	High mannose	Ambiguous	BLF	1235.58	1236.59	1236.45	C46H80O36N2	0.138184	-1	[M-H]-	30.8	7.4	1	1	CA_BLFLAD_NG_270917	2268	20.115	25.444	Logarithmic	N
120	(Hex)3 + (Man)3(GlcNAc)2	High mannose	Ambiguous	BLF	1397.65	1398.66	1398.5	C52H90O41N2	0.155359	-1	[M-H]-	30.9	7.43	1	1	CA_BLFLAD_NG_270917	2277	20.115	25.444	Logarithmic	N
3	(Hex)1 (HexNAc)1 + (Man)3(GlcNAc)2	Hybrid	G14831JP	IgA	1276.56	1277.57	1277.48	C48H83O36N3	0.091635	-1	[M-H]-	12.65	3.57	2	2	CA_igaLAD_NG_270917	915	20.285	25.446	Logarithmic	N
9	(Hex)1 (HexNAc)1 + (Man)3(GlcNAc)2	Hybrid	G17483QF	IgA	1276.56	1277.57	1277.48	C48H83O36N3	0.091635	-1	[M-H]-	18	3.57	2	2	CA_igaLAD_NG_270917	1335	20.285	25.446	Logarithmic	N
15	(Hex)1 (HexNAc)1 + (Man)3(GlcNAc)2	Hybrid	G17483QF	IgA	1276.56	1277.57	1277.48	C48H83O36N3	0.091635	-1	[M-H]-	19.4	4.75	2	2	CA_igaLAD_NG_270917	1444	20.285	25.446	Logarithmic	N
21	(Hex)2 (HexNAc)1 (NeuAc)1 + (Man)3(GlcNAc)2	Hybrid	G38155ZN	IgA	864.37	1730.75	1730.62	C65H110O49N4	0.130663	-2	[M-2H]	21.2	5.09	2	2.5	CA_igaLAD_NG_270917	1576	20.285	25.446	Logarithmic	N
25	(Hex)2 (HexNAc)1 + (Man)3(GlcNAc)2	Hybrid	G57540FR	IgA	1438.66	1439.67	1439.53	C54H93O41N3	0.13881	-1	[M-H]-	21.8	5.23	2	2	CA_igaLAD_NG_270917	1617	20.285	25.446	Logarithmic	N
31	(Hex)2 (HexNAc)2 + (Man)3(GlcNAc)2	Hybrid	G87598ZK	IgA	820.36	1642.73	1642.61	C62H106O46N4	0.126708	-2	[M-2H]	22.8	5.44	2	2	CA_igaLAD_NG_270917	1695	20.285	25.446	Logarithmic	N
52	(Hex)2 (HexNAc)1 (NeuAc)1 + (Man)3(GlcNAc)2	Hybrid	Ambiguous	BLF	864.37	1730.75	1730.62	C65H110O49N4	0.130663	-2	[M-2H]	24.9	5.86	2	2.5	CA_BLFLAD_NG_270917	1866	20.115	25.444	Logarithmic	N
65	(Hex)2 (HexNAc)1 + (Man)3(GlcNAc)2	Hybrid	Ambiguous	BLF	1438.66	1439.67	1439.53	C54H93O41N3	0.13881	-1	[M-H]-	26	6.11	2	2	CA_BLFLAD_NG_270917	1925	20.115	25.444	Logarithmic	N
71	(Hex)3 (HexNAc)1 + (Man)3(GlcNAc)2	Hybrid	G31603EH	BLF	799.84	1601.69	1601.58	C60H103O46N3	0.113257	-2	[M-2H]	26.5	6.25	2	2	CA_BLFLAD_NG_270917	1961	20.115	25.444	Logarithmic	N
80	(Hex)3 (HexNAc)1 (NeuAc)1 + (Man)3(GlcNAc)2	Hybrid	G74784VI	BLF	945.4	1892.81	1892.68	C71H120O54N4	0.137838	-2	[M-2H]	27.4	6.46	2	2.5	CA_BLFLAD_NG_270917	2032	20.115	25.444	Logarithmic	N
87	(Hex)4 (HexNAc)1 (NeuAc)1 + (Man)3(GlcNAc)2	Hybrid	Ambiguous	BLF	1026.46	2054.93	2054.73	C77H130O59N4	0.205013	-2	[M-2H]	28	6.59	2	2.5	CA_BLFLAD_NG_270917	2080	20.115	25.444	Logarithmic	N
92	(Hex)3 (HexNAc)2 + (Man)3(GlcNAc)2	Hybrid	Ambiguous	BLF	901.35	1804.71	1804.66	C68H116O51N4	0.053883	-2	[M-2H]	28.3	6.7	2	2	CA_BLFLAD_NG_270917	2101	20.115	25.444	Logarithmic	N
101	(Hex)3 (HexNAc)1 + (Man)3(GlcNAc)2	Hybrid	G31603EH	BLF	799.84	1601.69	1601.58	C60H103O46N3	0.113257	-2	[M-2H]	29	6.89	2	2	CA_BLFLAD_NG_270917	2140	20.115	25.444	Logarithmic	N
122	(Hex)3 (HexNAc)1 + (Man)3(GlcNAc)2	Hybrid	Ambiguous	BLF	799.84	1601.69	1601.58	C60H103O46N3	0.113257	-2	[M-2H]	31.3	7.55	2	2	CA_BLFLAD_NG_270917	2314	20.115	25.444	Logarithmic	N
150	(Hex)4 (HexNAc)1 + (Man)3(GlcNAc)2	Hybrid	Ambiguous	BLF	880.87	1763.75	1763.63	C66H113O51N3	0.120432	-2	[M-2H]	34.1	8.42	2	2	CA_BLFLAD_NG_270917	2509	20.115	25.444	Logarithmic	N
10	(HexNAc)2 (Deoxyhexose)1	Paucimannose	G39791JK	HNE	571.27	572.277	572.243	C22H40O15N2	0.034399	-1	[M-H]-	18.2	3.57	3	3	CA_HNELAD_NG_270917	939	18.582	24.447	Logarithmic	Core
5	(Hex)1 (HexNAc)2	Paucimannose	G55486HO	HNE	587.24	588.247	588.238	C22H40O16N2	0.009484	-1	[M-H]-	16.1	3.57	3	3	CA_HNELAD_NG_270917	797	18.582	24.447	Logarithmic	N
6	(Hex)3 (HexNAc)2	Paucimannose	G92707AV	BLF	911.39	912.397	912.343	C34H60O26N2	0.053834	-1	[M-H]-	16.8	3.57	3	3	CA_BLFLAD_NG_270917	1235	20.115	25.444	Logarithmic	N
13	(Hex)2 (HexNAc)3	Paucimannose	Ambiguous	IgG	952.44	953.447	953.37	C36H63O26N3	0.077285	-1	[M-H]-	18.2	4.57	3	3	CA_iggLAD_NG_270917	1379	20.245	25.337	Logarithmic	N
14	(Hex)3 (HexNAc)2	Paucimannose	Ambiguous	BLF	911.39	912.397	912.343	C34H60O26N2	0.053834	-1	[M-H]-	19.4	4.72	3	3	CA_BLFLAD_NG_270917	1445	20.115	25.444	Logarithmic	N
16	(Hex)2 (HexNAc)2	Paucimannose	G13947MP	HNE	749.34	750.347	750.291	C28H50O21N2	0.056659	-1	[M-H]-	20.1	4.87	3	3	CA_HNELAD_NG_270917	1063	18.582	24.447	Logarithmic	N
29	(Hex)2 (HexNAc)2	Paucimannose	G71522YD	IgA	749.34	750.347	750.291	C28H50O21N2	0.056659	-1	[M-H]-	22.7	5.42	3	3	CA_igaLAD_NG_270917	1681	20.285	25.446	Logarithmic	N
32	(Hex)2 (HexNAc)3	Paucimannose	G36936UT	HNE	952.43	953.437	953.37	C36H63O26N3	0.067285	-1	[M-H]-	23	5.47	3	3	CA_HNELAD_NG_270917	1283	18.582	24.447	Logarithmic	N
34	(Hex)3 (HexNAc)2	Paucimannose	Ambiguous	HNE	911.39	912.397	912.343	C34H60O26N2	0.053834	-1	[M-H]-	23.1	5.51	3	3	CA_HNELAD_NG_270917	1301	18.582	24.447	Logarithmic	N
26	(Hex)1 (HexNAc)2 (Deoxyhexose)1	Paucimannose	G39615UL	HNE	733.35	734.357	734.296	C28H50O20N2	0.061574	-1	[M-H]-	24.5	5.84	3	3	CA_HNELAD_NG_270917	1405	18.582	24.447	Logarithmic	Core
74	(Hex)3 (HexNAc)2	Paucimannose	Ambiguous	BLF	911.39	912.397	912.343	C34H60O26N2	0.053834	-1	[M-H]-	26.8	6.32	3	3	CA_BLFLAD_NG_270917	1996	20.115	25.444	Logarithmic	N
43	(Hex)2 (HexNAc)2 (Deoxyhexose)1	Paucimannose	G84448IT	HNE	895.42	896.427	896.349	C34H60O25N2	0.078749	-1	[M-H]-	28.2	6.77	3	3	CA_HNELAD_NG_270917	1715	18.582	24.447	Logarithmic	Core
64	(Hex)2 (HexNAc)3 (Deoxyhexose)1	Paucimannose	G03786GS	HNE	1098.52	1099.53	1099.43	C42H73O30N3	0.099375	-1	[M-H]-	30.2	7.37	3	3	CA_HNELAD_NG_270917	1836	18.582	24.447	Logarithmic	Core
100	(Hex)3 (HexNAc)2 (Deoxyhexose)1	Paucimannose	G77712UR	HNE	1057.51	1058.52	1058.4	C40H70O30N2	0.115924	-1	[M-H]-	33.8	8.52	3	3	CA_HNELAD_NG_270917	2105	18.582	24.447	Logarithmic	Core

## Sheet: OG Table Summary
ID	Composition	GlyTouCan Structure Accession	Sample Source	Observed precursor m/z	Neutral mass (reduced)	Theoretical neutral mass	Chemical formula	Error	Charge	Adduct	Retention time	GU value	Reference MS2 spectra	MS2 Scan#	Equation intercept	Equation slope	EQN type	Type
1	(Hex)1 (HexNAc)1 (NeuAc)1	G40269CS	PGM	675.32	676.327	676.254	C25H44O19N2	0.073439	-1	[M-H]	12.99	2.57201	CA_PGMLAD_OG_051017	945	7.95	14.91	Logarithmic	O-GalNAc
3	(Hex)3	G14831JP	CBHI	505.2	506.207	506.185	C18H34O16N0	0.022582	-1	[M-H]	12.65	2.5503	CA_CBHILAD_OG_051017	915	1.8884	15.529	Logarithmic	O-Man
4	(Hex)4	G48522XQ	CBHI	667.3	668.307	668.238	C24H44O21N0	0.069757	-1	[M-2H]	17.86	3.56695	CA_CBHILAD_OG_051017	1291	1.8884	15.529	Logarithmic	O-Man
5	(Hex)4	G55486HO	CBHI	667.3	668.307	668.238	C24H44O21N0	0.069757	-1	[M-2H]	19.42	3.94389	CA_CBHILAD_OG_051017	1410	1.8884	15.529	Logarithmic	O-Man
6	(Hex)5	G92707AV	CBHI	829.38	830.387	830.29	C30H54O26N0	0.096932	-1	[M-2H]	22.23	4.72619	CA_CBHILAD_OG_051017	1626	1.8884	15.529	Logarithmic	O-Man
7	(Hex)4 (HexA)1	G14278VS	CBHI	843.36	844.367	844.306	C31H56O26N0	0.061282	-1	[M-2H]	17.79	3.55091	CA_CBHILAD_OG_051017	1284	1.8884	15.529	Logarithmic	O-Man
8	(Hex)5 (HexA)1	G85626DA	CBHI	1005.44	1006.45	1006.36	C37H66O31N0	0.088457	-1	[M-2H]	17.47	3.47848	CA_CBHILAD_OG_051017	1260	1.8884	15.529	Logarithmic	O-Man
9	(Hex)5 (HexA)1	Unspecified	CBHI	1005.44	1006.45	1006.36	C37H66O31N0	0.088457	-1	[M-2H]	19.81	4.04419	CA_CBHILAD_OG_051017	1441	1.8884	15.529	Logarithmic	O-Man
10	(Hex)6 (HexA)1	G39563YN	CBHI	1167.56	1168.57	1168.41	C43H76O36N0	0.155632	-1	[M-2H]	19.57	3.98217	CA_CBHILAD_OG_051017	1425	1.8884	15.529	Logarithmic	O-Man
11	(Hex)1 (HexNAc)2	G67274NW	PGM	587.29	588.297	588.238	C22H40O16N2	0.059484	-1	[M-H]	10.39	2.16841	CA_PGMLAD_OG_051017	741	1.3995	15.232	Logarithmic	O-GalNAc
12	(Hex)1 (HexNAc)2	G31601FB	PGM	587.29	588.297	588.238	C22H40O16N2	0.059484	-1	[M-H]	14.22	2.78832	CA_PGMLAD_OG_051017	1027	1.3995	15.232	Logarithmic	O-GalNAc
13	(Hex)1 (HexNAc)2 (NeuAc)1	G40188OO	PGM	878.43	879.437	879.333	C33H57O24N3	0.104065	-1	[M-H]	14.22	2.78832	CA_PGMLAD_OG_051017	1026	1.3995	15.232	Logarithmic	O-GalNAc
14	(Hex)1 (HexNAc)1 (NeuAc)2	G84906ML	PGM	966.54	967.547	967.349	C36H61O27N3	0.19802	-1	[M-H]	15.23	2.97948	CA_PGMLAD_OG_051017	1103	1.3995	15.232	Logarithmic	O-GalNAc
15	(Hex)1 (HexNAc)2	G21312EA	PGM	587.29	588.297	588.238	C22H40O16N2	0.059484	-1	[M-H]	17.59	3.47879	CA_PGMLAD_OG_051017	1273	1.3995	15.232	Logarithmic	O-GalNAc
16	(Hex)1 (HexNAc)3	G73663RH	PGM	790.4	791.407	791.317	C30H53O21N3	0.09011	-1	[M-H]	17.59	3.47879	CA_PGMLAD_OG_051017	1276	1.3995	15.232	Logarithmic	O-GalNAc
17	(Hex)2 (HexNAc)3 (Deoxyhexose)1 (Sulph)1	G72261BF	PGM	1178.56	1179.57	1179.38	C42H73O33N3S1	0.182559	-1	[M-H]	17.74	3.51322	CA_PGMLAD_OG_051017	1289	1.3995	15.232	Logarithmic	O-GalNAc
18	(Hex)2 (HexNAc)2 (Deoxyhexose)1 (Sulph)1	G01302LF	PGM	975.42	976.427	976.305	C34H60O28N2S1	0.121933	-1	[M-H]	18.3	3.64478	CA_PGMLAD_OG_051017	1330	1.3995	15.232	Logarithmic	O-GalNAc
19	(Hex)4 (HexNAc)2 (Deoxyhexose)1	G23031BI	PGM	1219.61	1220.62	1220.45	C46H80O35N2	0.163099	-1	[M-H]	18.53	3.70024	CA_PGMLAD_OG_051017	1354	1.3995	15.232	Logarithmic	O-GalNAc
20	(Hex)1 (HexNAc)2 (NeuAc)1	G35679QA	PGM	878.43	879.437	879.333	C33H57O24N3	0.104065	-1	[M-H]	19.24	3.8768	CA_PGMLAD_OG_051017	1402	1.3995	15.232	Logarithmic	O-GalNAc
21	(Hex)1 (HexNAc)3 (Deoxyhexose)1 (Sulph)1	G48422CN	PGM	1016.46	1017.47	1017.33	C36H63O28N3S1	0.135384	-1	[M-H]	19.32	3.89721	CA_PGMLAD_OG_051017	1405	1.3995	15.232	Logarithmic	O-GalNAc
22	(Hex)2 (HexNAc)2 (Deoxyhexose)1 (Sulph)1	G62621XS	PGM	975.42	976.427	976.305	C34H60O28N2S1	0.121933	-1	[M-H]	19.56	3.9591	CA_PGMLAD_OG_051017	1426	1.3995	15.232	Logarithmic	O-GalNAc
23	(Hex)1 (HexNAc)3 (Deoxyhexose)1 (Sulph)1	G87422MU	PGM	1016.46	1017.47	1017.33	C36H63O28N3S1	0.135384	-1	[M-H]	19.88	4.04316	CA_PGMLAD_OG_051017	1458	1.3995	15.232	Logarithmic	O-GalNAc
24	(Hex)2 (HexNAc)2	G18132YR	PGM	749.38	750.387	750.291	C28H50O21N2	0.096659	-1	[M-H]	19.96	4.06445	CA_PGMLAD_OG_051017	1456	1.3995	15.232	Logarithmic	O-GalNAc
25	(Hex)1 (HexNAc)2 (Deoxyhexose)1	G57540FR	PGM	733.42	734.427	734.296	C28H50O20N2	0.131574	-1	[M-H]	20.43	4.19182	CA_PGMLAD_OG_051017	1486	1.3995	15.232	Logarithmic	O-GalNAc
26	(Hex)2 (HexNAc)3	G39615UL	PGM	952.49	953.497	953.37	C36H63O26N3	0.127285	-1	[M-H]	20.82	4.30053	CA_PGMLAD_OG_051017	1518	1.3995	15.232	Logarithmic	O-GalNAc
27	(Hex)1 (HexNAc)3 (NeuAc)1	Ambiguous	PGM	1081.59	1082.6	1082.41	C41H70O29N4	0.184691	-1	[M-H]	20.82	4.30053	CA_PGMLAD_OG_051017	1531	1.3995	15.232	Logarithmic	O-GalNAc
28	(Hex)1 (HexNAc)4 (Deoxyhexose)1	G54295IW	PGM	1139.64	1140.65	1140.45	C44H76O30N4	0.192826	-1	[M-H]	20.98	4.34594	CA_PGMLAD_OG_051017	1544	1.3995	15.232	Logarithmic	O-GalNAc
29	(Hex)1 (HexNAc)4	G71522YD	PGM	993.52	994.527	994.397	C38H66O26N4	0.130736	-1	[M-H]	21.06	4.36883	CA_PGMLAD_OG_051017	1537	1.3995	15.232	Logarithmic	O-GalNAc
30	(Hex)1 (HexNAc)3 (NeuAc)1	G05625EO	PGM	1081.59	1082.6	1082.41	C41H70O29N4	0.184691	-1	[M-H]	21.06	4.36883	CA_PGMLAD_OG_051017	1550	1.3995	15.232	Logarithmic	O-GalNAc
31	(Hex)2 (HexNAc)3 (NeuAc)1	G76500NB	PGM	1243.65	1244.66	1244.47	C47H80O34N4	0.191866	-1	[M-H]	21.38	4.46158	CA_PGMLAD_OG_051017	1564	1.3995	15.232	Logarithmic	O-GalNAc
32	(Hex)2 (HexNAc)3	G39615UL	PGM	952.49	953.497	953.37	C36H63O26N3	0.127285	-1	[M-H]	21.62	4.53243	CA_PGMLAD_OG_051017	1578	1.3995	15.232	Logarithmic	O-GalNAc
33	(Hex)1 (HexNAc)4	G71522YD	PGM	993.52	994.527	994.397	C38H66O26N4	0.130736	-1	[M-H]	21.62	4.53243	CA_PGMLAD_OG_051017	1585	1.3995	15.232	Logarithmic	O-GalNAc
34	(Hex)2 (HexNAc)2	G54461SS	PGM	749.38	750.387	750.291	C28H50O21N2	0.096659	-1	[M-H]	21.7	4.5563	CA_PGMLAD_OG_051017	1589	1.3995	15.232	Logarithmic	O-GalNAc
35	(Hex)1 (HexNAc)3 (Deoxyhexose)1	G99772FN	PGM	936.52	937.527	937.375	C36H63O25N3	0.1522	-1	[M-H]	21.78	4.58029	CA_PGMLAD_OG_051017	1602	1.3995	15.232	Logarithmic	O-GalNAc
36	(Hex)2 (HexNAc)3	G84064VM	PGM	952.49	953.497	953.37	C36H63O26N3	0.127285	-1	[M-H]	21.86	4.60441	CA_PGMLAD_OG_051017	1606	1.3995	15.232	Logarithmic	O-GalNAc
37	(Hex)2 (HexNAc)2 (NeuAc)1	Ambiguous	PGM	1040.56	1041.57	1041.39	C39H67O29N3	0.18124	-1	[M-H]	21.94	4.62866	CA_PGMLAD_OG_051017	1607	1.3995	15.232	Logarithmic	O-GalNAc
38	(Hex)1 (HexNAc)3 (NeuAc)1	G01437WY	PGM	1081.59	1082.6	1082.41	C41H70O29N4	0.184691	-1	[M-H]	22.1	4.67754	CA_PGMLAD_OG_051017	1622	1.3995	15.232	Logarithmic	O-GalNAc
39	(Hex)2 (HexNAc)2 (NeuAc)2	G52120NK	PGM	1331.69	1332.7	1332.48	C50H84O37N4	0.215821	-1	[M-H]	22.23	4.71763	CA_PGMLAD_OG_051017	1631	1.3995	15.232	Logarithmic	O-GalNAc
40	(Hex)2 (HexNAc)3 (Deoxyhexose)1 (Sulph)1	Ambiguous	PGM	1178.56	1179.57	1179.38	C42H73O33N3S1	0.182559	-1	[M-H]	22.42	4.77684	CA_PGMLAD_OG_051017	1642	1.3995	15.232	Logarithmic	O-GalNAc
41	(Hex)2 (HexNAc)4	G96005ME	PGM	1155.64	1156.65	1156.45	C44H76O31N4	0.197911	-1	[M-H]	22.66	4.85271	CA_PGMLAD_OG_051017	1666	1.3995	15.232	Logarithmic	O-GalNAc
42	(Hex)2 (HexNAc)4 (Deoxyhexose)1	Ambiguous	PGM	1301.73	1302.74	1302.51	C50H86O35N4	0.230001	-1	[M-H]	23.15	5.01135	CA_PGMLAD_OG_051017	1692	1.3995	15.232	Logarithmic	O-GalNAc
43	(Hex)1 (HexNAc)4 (Deoxyhexose)1	Ambiguous	PGM	1139.64	1140.65	1140.45	C44H76O30N4	0.192826	-1	[M-H]	23.64	5.17518	CA_PGMLAD_OG_051017	1735	1.3995	15.232	Logarithmic	O-GalNAc
44	(Hex)2 (HexNAc)2 (Deoxyhexose)1 (NeuAc)1	G91474LB	PGM	1186.65	1187.66	1187.44	C45H77O33N3	0.21333	-1	[M-H]	23.64	5.17518	CA_PGMLAD_OG_051017	1733	1.3995	15.232	Logarithmic	O-GalNAc
45	(Hex)2 (HexNAc)3 (Deoxyhexose)1 (Sulph)1	G74917JV	PGM	1178.56	1179.57	1179.38	C42H73O33N3S1	0.182559	-1	[M-H]	23.8	5.22983	CA_PGMLAD_OG_051017	1746	1.3995	15.232	Logarithmic	O-GalNAc
46	(Hex)2 (HexNAc)3 (NeuAc)1	G20453WS	PGM	1243.65	1244.66	1244.47	C47H80O34N4	0.191866	-1	[M-H]	23.96	5.28506	CA_PGMLAD_OG_051017	1758	1.3995	15.232	Logarithmic	O-GalNAc
47	(Hex)1 (HexNAc)1 (Deoxyhexose)1 (NeuAc)1	G60138JZ	PGM	821.4	822.407	822.312	C31H54O23N2	0.095529	-1	[M-H]	24.21	5.37251	CA_PGMLAD_OG_051017	1774	1.3995	15.232	Logarithmic	O-GalNAc
48	(Hex)2 (HexNAc)2 (Deoxyhexose)1	G16440EL	PGM	895.45	896.457	896.349	C34H60O25N2	0.108749	-1	[M-H]	24.76	5.57005	CA_PGMLAD_OG_051017	1811	1.3995	15.232	Logarithmic	O-GalNAc
49	(Hex)2 (HexNAc)4 (Deoxyhexose)1	Ambiguous	PGM	1301.73	1302.74	1302.51	C50H86O35N4	0.230001	-1	[M-H]	24.84	5.59938	CA_PGMLAD_OG_051017	1823	1.3995	15.232	Logarithmic	O-GalNAc
50	(Hex)2 (HexNAc)4 (Deoxyhexose)2	G18950NM	PGM	1447.8	1448.81	1448.57	C56H96O39N4	0.242091	-1	[M-H]	24.92	5.62887	CA_PGMLAD_OG_051017	1835	1.3995	15.232	Logarithmic	O-GalNAc
51	(Hex)2 (HexNAc)5	Ambiguous	PGM	678.83	1359.67	1359.53	C52H89O36N5	0.145809	-2	[M-2H]	25.67	5.91296	CA_PGMLAD_OG_051017	1882	1.3995	15.232	Logarithmic	O-GalNAc
52	(Hex)2 (HexNAc)2 (Deoxyhexose)2 (Sulph)1	G43933MN	PGM	1121.54	1122.55	1122.36	C40H70O32N2S1	0.184023	-1	[M-H]	25.75	5.9441	CA_PGMLAD_OG_051017	1889	1.3995	15.232	Logarithmic	O-GalNAc
53	(Hex)2 (HexNAc)2 (Deoxyhexose)1 (NeuAc)1	G12428MZ	PGM	1186.65	1187.66	1187.44	C45H77O33N3	0.21333	-1	[M-H]	25.91	6.00687	CA_PGMLAD_OG_051017	1903	1.3995	15.232	Logarithmic	O-GalNAc
54	(Hex)1 (HexNAc)1 (Deoxyhexose)1	G05187DJ	PGM	530.29	531.297	531.216	C20H37O15N1	0.080948	-1	[M-H]	26.72	6.33494	CA_PGMLAD_OG_051017	1950	1.3995	15.232	Logarithmic	O-GalNAc
55	(Hex)3 (HexNAc)5 (Deoxyhexose)1	Ambiguous	PGM	832.92	1667.85	1667.64	C64H109O45N5	0.215074	-2	[M-2H]	27.03	6.46519	CA_PGMLAD_OG_051017	1987	1.3995	15.232	Logarithmic	O-GalNAc
56	(Hex)3 (HexNAc)3	G40107NH	PGM	1114.59	1115.6	1115.42	C42H73O31N3	0.17446	-1	[M-H]	27.35	6.60245	CA_PGMLAD_OG_051017	2012	1.3995	15.232	Logarithmic	O-GalNAc
57	(Hex)2 (HexNAc)3 (Deoxyhexose)1	G08055MG	PGM	1098.65	1099.66	1099.43	C42H73O30N3	0.229375	-1	[M-H]	27.43	6.63722	CA_PGMLAD_OG_051017	2014	1.3995	15.232	Logarithmic	O-GalNAc
58	(Hex)1 (HexNAc)2 (Deoxyhexose)1	G77674IK	PGM	733.42	734.427	734.296	C28H50O20N2	0.131574	-1	[M-H]	27.6	6.71171	CA_PGMLAD_OG_051017	2027	1.3995	15.232	Logarithmic	O-GalNAc
59	(Hex)3 (HexNAc)3	G92032WO	PGM	1114.59	1115.6	1115.42	C42H73O31N3	0.17446	-1	[M-H]	27.92	6.8542	CA_PGMLAD_OG_051017	2060	1.3995	15.232	Logarithmic	O-GalNAc
60	(Hex)2 (HexNAc)4 (Deoxyhexose)1	Ambiguous	PGM	1301.73	1302.74	1302.51	C50H86O35N4	0.230001	-1	[M-H]	28	6.8903	CA_PGMLAD_OG_051017	2057	1.3995	15.232	Logarithmic	O-GalNAc
61	(Hex)3 (HexNAc)6	Ambiguous	PGM	861.48	1724.97	1724.66	C66H112O46N6	0.31361	-2	[M-2H]	28	6.8903	CA_PGMLAD_OG_051017	2066	1.3995	15.232	Logarithmic	O-GalNAc
62	(Hex)1 (HexNAc)3 (Deoxyhexose)1	G88014YP	PGM	936.52	937.527	937.375	C36H63O25N3	0.1522	-1	[M-H]	28.33	7.0412	CA_PGMLAD_OG_051017	2081	1.3995	15.232	Logarithmic	O-GalNAc
63	(Hex)2 (HexNAc)2 (Deoxyhexose)1	G25795DA	PGM	895.45	896.457	896.349	C34H60O25N2	0.108749	-1	[M-H]	28.74	7.23331	CA_PGMLAD_OG_051017	2104	1.3995	15.232	Logarithmic	O-GalNAc
64	(Hex)3 (HexNAc)6	G85483CN	PGM	861.48	1724.97	1724.66	C66H112O46N6	0.31361	-2	[M-2H]	28.74	7.23331	CA_PGMLAD_OG_051017	2112	1.3995	15.232	Logarithmic	O-GalNAc
65	(Hex)3 (HexNAc)3 (Deoxyhexose)1 (Sulph)1	Ambiguous	PGM	669.81	1341.63	1341.44	C48H83O38N3S1	0.197006	-2	[M-2H]	28.99	7.353	CA_PGMLAD_OG_051017	2132	1.3995	15.232	Logarithmic	O-GalNAc
66	(Hex)2 (HexNAc)3 (Deoxyhexose)2	G48365EK	PGM	1244.69	1245.7	1245.49	C48H83O34N3	0.211465	-1	[M-H]	29.48	7.59339	CA_PGMLAD_OG_051017	2156	1.3995	15.232	Logarithmic	O-GalNAc
67	(Hex)2 (HexNAc)3 (Deoxyhexose)1	G53188WR	PGM	1098.65	1099.66	1099.43	C42H73O30N3	0.229375	-1	[M-H]	29.56	7.63338	CA_PGMLAD_OG_051017	2165	1.3995	15.232	Logarithmic	O-GalNAc
68	(Hex)3 (HexNAc)3 (Deoxyhexose)1	Ambiguous	PGM	1260.68	1261.69	1261.48	C48H83O35N3	0.20655	-1	[M-H]	29.8	7.7546	CA_PGMLAD_OG_051017	2189	1.3995	15.232	Logarithmic	O-GalNAc
69	(Hex)4 (HexNAc)4	G40792HV	PGM	739.36	1480.73	1480.56	C56H96O41N4	0.179533	-2	[M-2H]	30.13	7.92444	CA_PGMLAD_OG_051017	2215	1.3995	15.232	Logarithmic	O-GalNAc
70	(Hex)3 (HexNAc)2 (Deoxyhexose)2	G20735IM	PGM	1203.66	1204.67	1204.46	C46H80O34N2	0.208014	-1	[M-H]	30.55	8.14598	CA_PGMLAD_OG_051017	2246	1.3995	15.232	Logarithmic	O-GalNAc
71	(Hex)3 (HexNAc)5 (Deoxyhexose)1	Ambiguous	PGM	832.92	1667.85	1667.64	C64H109O45N5	0.215074	-2	[M-2H]	30.64	8.19426	CA_PGMLAD_OG_051017	2239	1.3995	15.232	Logarithmic	O-GalNAc
72	(Hex)3 (HexNAc)4 (Deoxyhexose)1	Ambiguous	PGM	731.36	1464.73	1464.56	C56H96O40N4	0.174448	-2	[M-2H]	30.73	8.24282	CA_PGMLAD_OG_051017	2267	1.3995	15.232	Logarithmic	O-GalNAc
73	(Hex)3 (HexNAc)5 (Deoxyhexose)1	Ambiguous	PGM	832.92	1667.85	1667.64	C64H109O45N5	0.215074	-2	[M-2H]	31.07	8.42888	CA_PGMLAD_OG_051017	2287	1.3995	15.232	Logarithmic	O-GalNAc
74	(Hex)3 (HexNAc)5 (Deoxyhexose)1	Ambiguous	PGM	832.92	1667.85	1667.64	C64H109O45N5	0.215074	-2	[M-2H]	31.4	8.61348	CA_PGMLAD_OG_051017	2308	1.3995	15.232	Logarithmic	O-GalNAc
75	(Hex)3 (HexNAc)3 (Deoxyhexose)1	Ambiguous	PGM	1260.68	1261.69	1261.48	C48H83O35N3	0.20655	-1	[M-H]	31.45	8.6418	CA_PGMLAD_OG_051017	2306	1.3995	15.232	Logarithmic	O-GalNAc
76	(Hex)2 (HexNAc)2 (Deoxyhexose)2	G91669BT	PGM	1041.64	1042.65	1042.41	C40H70O29N2	0.240839	-1	[M-H]	31.48	8.65884	CA_PGMLAD_OG_051017	2311	1.3995	15.232	Logarithmic	O-GalNAc
77	(Hex)2 (HexNAc)2 (Deoxyhexose)1 (NeuAc)2	G03266UM	PGM	1477.75	1478.76	1478.54	C56H94O41N4	0.217911	-1	[M-H]	31.89	8.89507	CA_PGMLAD_OG_051017	2338	1.3995	15.232	Logarithmic	O-GalNAc
78	(Hex)4 (HexNAc)4 (Deoxyhexose)2	Ambiguous	PGM	885.5	1773.01	1772.67	C68H116O49N4	0.343713	-2	[M-2H]	32.4	9.19794	CA_PGMLAD_OG_051017	2377	1.3995	15.232	Logarithmic	O-GalNAc
79	(Hex)3 (HexNAc)5 (Deoxyhexose)1	G36970ZN	PGM	832.92	1667.85	1667.64	C64H109O45N5	0.215074	-2	[M-2H]	32.57	9.30117	CA_PGMLAD_OG_051017	2389	1.3995	15.232	Logarithmic	O-GalNAc
80	(Hex)3 (HexNAc)2 (Deoxyhexose)2	Ambiguous	PGM	1203.66	1204.67	1204.46	C46H80O34N2	0.208014	-1	[M-H]	32.82	9.45509	CA_PGMLAD_OG_051017	2408	1.3995	15.232	Logarithmic	O-GalNAc
81	(Hex)4 (HexNAc)4 (Deoxyhexose)1	Ambiguous	PGM	812.43	1626.87	1626.61	C62H106O45N4	0.261623	-2	[M-2H]	32.82	9.45509	CA_PGMLAD_OG_051017	2414	1.3995	15.232	Logarithmic	O-GalNAc
82	(Hex)3 (HexNAc)4 (Deoxyhexose)2	G50849OF	PGM	804.43	1610.87	1610.62	C62H106O44N4	0.256538	-2	[M-2H]	32.9	9.50488	CA_PGMLAD_OG_051017	2411	1.3995	15.232	Logarithmic	O-GalNAc
83	(Hex)1 (HexNAc)2 (Deoxyhexose)1	Ambiguous	PGM	733.42	734.427	734.296	C28H50O20N2	0.131574	-1	[M-H]	33.07	9.61156	CA_PGMLAD_OG_051017	2426	1.3995	15.232	Logarithmic	O-GalNAc
84	(Hex)2 (HexNAc)2 (Deoxyhexose)2	G91731DX	PGM	1041.64	1042.65	1042.41	C40H70O29N2	0.240839	-1	[M-H]	33.11	9.63683	CA_PGMLAD_OG_051017	2416	1.3995	15.232	Logarithmic	O-GalNAc
85	(Hex)3 (HexNAc)4 (Deoxyhexose)2	G50849OF	PGM	804.43	1610.87	1610.62	C62H106O44N4	0.256538	-2	[M-2H]	33.48	9.87378	CA_PGMLAD_OG_051017	2458	1.3995	15.232	Logarithmic	O-GalNAc
86	(Hex)4 (HexNAc)4 (Deoxyhexose)2	Ambiguous	PGM	885.5	1773.01	1772.67	C68H116O49N4	0.343713	-2	[M-2H]	33.48	9.87378	CA_PGMLAD_OG_051017	2455	1.3995	15.232	Logarithmic	O-GalNAc
87	(Hex)3 (HexNAc)3 (Deoxyhexose)1	G14623FX	PGM	1260.68	1261.69	1261.48	C48H83O35N3	0.20655	-1	[M-H]	34.06	10.257	CA_PGMLAD_OG_051017	2495	1.3995	15.232	Logarithmic	O-GalNAc
88	(Hex)3 (HexNAc)3 (Deoxyhexose)2	G33886DT	PGM	702.87	1407.75	1407.54	C54H93O39N3	0.215912	-2	[M-2H]	34.56	10.5993	CA_PGMLAD_OG_051017	2527	1.3995	15.232	Logarithmic	O-GalNAc
89	(Hex)3 (HexNAc)4 (Deoxyhexose)2	G75357VU	PGM	804.43	1610.87	1610.62	C62H106O44N4	0.256538	-2	[M-2H]	35.05	10.9458	CA_PGMLAD_OG_051017	2562	1.3995	15.232	Logarithmic	O-GalNAc
90	(Hex)4 (HexNAc)4 (Deoxyhexose)2	Ambiguous	PGM	885.5	1773.01	1772.67	C68H116O49N4	0.343713	-2	[M-2H]	35.38	11.1855	CA_PGMLAD_OG_051017	2596	1.3995	15.232	Logarithmic	O-GalNAc
91	(Hex)4 (HexNAc)4 (Deoxyhexose)3	G35941VN	PGM	958.52	1919.05	1918.73	C74H126O53N4	0.325803	-2	[M-2H]	35.64	11.3781	CA_PGMLAD_OG_051017	2608	1.3995	15.232	Logarithmic	O-GalNAc
92	(Hex)4 (HexNAc)5 (Deoxyhexose)2	G75042KU	PGM	987.02	1976.05	1975.75	C76H129O54N5	0.304339	-2	[M-2H]	35.81	11.5058	CA_PGMLAD_OG_051017	2620	1.3995	15.232	Logarithmic	O-GalNAc
93	(Hex)2 (HexNAc)3 (Deoxyhexose)2	G56979BY	PGM	1244.69	1245.7	1245.49	C48H83O34N3	0.211465	-1	[M-H]	35.99	11.6426	CA_PGMLAD_OG_051017	2633	1.3995	15.232	Logarithmic	O-GalNAc
94	(Hex)3 (HexNAc)4 (Deoxyhexose)2	Ambiguous	PGM	804.43	1610.87	1610.62	C62H106O44N4	0.256538	-2	[M-2H]	36.16	11.7732	CA_PGMLAD_OG_051017	2652	1.3995	15.232	Logarithmic	O-GalNAc
95	(Hex)4 (HexNAc)4 (Deoxyhexose)2	Ambiguous	PGM	885.5	1773.01	1772.67	C68H116O49N4	0.343713	-2	[M-2H]	36.57	12.0944	CA_PGMLAD_OG_051017	2675	1.3995	15.232	Logarithmic	O-GalNAc
96	(Hex)4 (HexNAc)5 (Deoxyhexose)2	G06448OR	PGM	987.02	1976.05	1975.75	C76H129O54N5	0.304339	-2	[M-2H]	36.66	12.1661	CA_PGMLAD_OG_051017	2686	1.3995	15.232	Logarithmic	O-GalNAc
97	(Hex)4 (HexNAc)4 (Deoxyhexose)2	G41552DE	PGM	885.5	1773.01	1772.67	C68H116O49N4	0.343713	-2	[M-2H]	37.04	12.4734	CA_PGMLAD_OG_051017	2710	1.3995	15.232	Logarithmic	O-GalNAc
98	(Hex)4 (HexNAc)4 (Deoxyhexose)1	G24327KR	PGM	812.43	1626.87	1626.61	C62H106O45N4	0.261623	-2	[M-2H]	38.04	13.3198	CA_PGMLAD_OG_051017	2798	1.3995	15.232	Logarithmic	O-GalNAc
99	(Hex)4 (HexNAc)4 (Deoxyhexose)3	G367886TD	PGM	958.52	1919.05	1918.73	C74H126O53N4	0.325803	-2	[M-2H]	38.67	13.8823	CA_PGMLAD_OG_051017	2826	1.3995	15.232	Logarithmic	O-GalNAc
100	(Hex)4 (HexNAc)4 (Deoxyhexose)1	Ambiguous	PGM	812.43	1626.87	1626.61	C62H106O45N4	0.261623	-2	[M-2H]	38.83	14.0289	CA_PGMLAD_OG_051017	2852	1.3995	15.232	Logarithmic	O-GalNAc
101	(Hex)4 (HexNAc)4 (Deoxyhexose)1	G01520KE	PGM	812.43	1626.87	1626.61	C62H106O45N4	0.261623	-2	[M-2H]	39.46	14.6213	CA_PGMLAD_OG_051017	2892	1.3995	15.232	Logarithmic	O-GalNAc

## Sheet: U87MG NG Extend
ID	Composition	GlyTouCan ID	Sample Source	Observed precursor m/z	Neutral mass (reduced)	Theoretical neutral mass	Chemical formula	Error	Charge	Adduct	Retention time	GU value	Reference MS2 spectra	MS2 Scan#	EQN type
200	(Hex)2 (Deoxyhexose)1 + (Man)3(GlcNAc)2	G97353GO	U87MG	1381.78	1382.79	1382.51	C52H90O40N2	0.280274	-1	[M-H]	32.2	9.06	CA_U87clLAD_NG_051017	2428	Logarithmic
201	(Hex)2 (HexNAc)1 (Deoxyhexose)1 (NeuAc)1 + (Man)3(GlcNAc)2	G51461ZF	U87MG	937.46	1876.93	1876.68	C71H120O53N4	0.252753	-2	[M-2H]	32	8.91	CA_U87clLAD_NG_051017	2416	Logarithmic
202	(Hex)2 (HexNAc)1 (Deoxyhexose)1 + (Man)3(GlcNAc)2	G38702RY	U87MG	791.89	1585.79	1585.59	C60H103O45N3	0.208172	-2	[M-2H]	29.3	7.51	CA_U87clLAD_NG_051017	2221	Logarithmic
203	(Hex)2 (HexNAc)1 (NeuAc)1 + (Man)3(GlcNAc)2	G21754WR	U87MG	864.4	1730.81	1730.62	C65H110O49N4	0.190663	-2	[M-2H]	29.5	7.59	CA_U87clLAD_NG_051017	2232	Logarithmic
204	(Hex)3 (HexNAc)1 (Deoxyhexose)1 (NeuAc)1 + (Man)3(GlcNAc)2	G79057YU	U87MG	1018.51	2039.03	2038.73	C77H130O58N4	0.299928	-2	[M-2H]	33	9.55	CA_U87clLAD_NG_051017	2488	Logarithmic
205	(Hex)3 (HexNAc)1 (Deoxyhexose)1 + (Man)3(GlcNAc)2	G03605BS	U87MG	872.92	1747.85	1747.64	C66H113O50N3	0.215347	-2	[M-2H]	30.9	8.3	CA_U87clLAD_NG_051017	2337	Logarithmic
206	(Hex)3 (HexNAc)1 (NeuAc)1 + (Man)3(GlcNAc)2	G65666SB	U87MG	945.46	1892.93	1892.68	C71H120O54N4	0.257838	-2	[M-2H]	30.5	8.13	CA_U87clLAD_NG_051017	2313	Logarithmic
207	(Hex)3 (HexNAc)2 (Deoxyhexose)2 + (Man)3(GlcNAc)2	Ambiguous	U87MG	1047.56	2097.13	2096.78	C80H136O59N4	0.358063	-2	[M-2H]	33.9	10.07	CA_U87clLAD_NG_051017	2550	Logarithmic
208	(Hex)4 (HexNAc)2 (Deoxyhexose)1	G75641KQ	U87MG	1219.64	1220.65	1220.45	C46H80O35N2	0.193099	-1	[M-H]	30.2	7.95	CA_U87clLAD_NG_051017	2287	Logarithmic
209	(Hex)3 (HexNAc)3 (Deoxyhexose)1 (NeuAc)1 + (Man)3(GlcNAc)2	Ambiguous	U87MG	1221.63	2445.27	2444.89	C93H156O68N6	0.38118	-2	[M-2H]	35.5	11.2	CA_U87clLAD_NG_051017	2644	Logarithmic
210	(Hex)3 (HexNAc)3 (Deoxyhexose)1 (NeuAc)1 + (Man)3(GlcNAc)2	Ambiguous	U87MG	1221.63	2445.27	2444.89	C93H156O68N6	0.38118	-2	[M-2H]	37.9	13.04	CA_U87clLAD_NG_051017	2668	Logarithmic
211	(Hex)3 (HexNAc)3 (Deoxyhexose)1 (NeuAc)1 + (Man)3(GlcNAc)2	Ambiguous	U87MG	1221.63	2445.27	2444.89	C93H156O68N6	0.38118	-2	[M-2H]	38.7	13.74	CA_U87clLAD_NG_051017	2885	Logarithmic
212	(Hex)3 (HexNAc)3 (Deoxyhexose)1 (NeuAc)1 + (Man)3(GlcNAc)2	Ambiguous	U87MG	1221.63	2445.27	2444.89	C93H156O68N6	0.38118	-2	[M-2H]	39.5	14.42	CA_U87clLAD_NG_051017	2937	Logarithmic
213	(Hex)3 (HexNAc)3 (Deoxyhexose)1 (NeuAc)3 + (Man)3(GlcNAc)2	Ambiguous	U87MG	1008.18	3027.56	3027.08	C115H190O84N8	0.477614	-3	[M-3H]	36.3	11.73	CA_U87clLAD_NG_051017	2710	Logarithmic
214	(Hex)3 (HexNAc)3 (Deoxyhexose)1 (NeuAc)3 + (Man)3(GlcNAc)2	Ambiguous	U87MG	1008.18	3027.56	3027.08	C115H190O84N8	0.477614	-3	[M-3H]	36.9	12.26	CA_U87clLAD_NG_051017	2752	Logarithmic
215	(Hex)3 (HexNAc)3 (Deoxyhexose)1 + (Man)3(GlcNAc)2	Ambiguous	U87MG	1076.09	2154.19	2153.8	C82H139O60N5	0.396599	-2	[M-2H]	33.8	10.01	CA_U87clLAD_NG_051017	2542	Logarithmic
216	(Hex)3 (HexNAc)3 (Deoxyhexose)1 + (Man)3(GlcNAc)2	Ambiguous	U87MG	1076.09	2154.19	2153.8	C82H139O60N5	0.396599	-2	[M-2H]	35.4	11.07	CA_U87clLAD_NG_051017	2645	Logarithmic
217	(Hex)3 (HexNAc)3 (Deoxyhexose)1 + (Man)3(GlcNAc)2	Ambiguous	U87MG	1076.09	2154.19	2153.8	C82H139O60N5	0.396599	-2	[M-2H]	37.8	12.97	CA_U87clLAD_NG_051017	2819	Logarithmic
218	(Hex)3 (HexNAc)3 (Deoxyhexose)2 (NeuAc)3 + (Man)3(GlcNAc)2	Ambiguous	U87MG	1056.56	3172.7	3173.14	C121H200O88N8	-0.440296	-3	[M-3H]	30.3	7.99	CA_U87clLAD_NG_051017	2296	Logarithmic
219	(Hex)3 (HexNAc)3 (Deoxyhexose)2 (NeuAc)3 + (Man)3(GlcNAc)2	Ambiguous	U87MG	1056.56	3172.7	3173.14	C121H200O88N8	-0.440296	-3	[M-3H]	33.5	9.84	CA_U87clLAD_NG_051017	2517	Logarithmic
220	(Hex)3 (HexNAc)3 (Deoxyhexose)3 (NeuAc)1 (NeuGc)1 + (Man)3(GlcNAc)2	Ambiguous	U87MG	1521.3	3044.61	3044.1	C116H193O85N7	0.515026	-2	[M-2H]	36.2	11.59	CA_U87clLAD_NG_051017	2701	Logarithmic
221	(Hex)3 (HexNAc)3 (NeuAc)1 + (Man)3(GlcNAc)2	Ambiguous	U87MG	1148.59	2299.19	2298.84	C87H146O64N6	0.35909	-2	[M-2H]	33.1	9.57	CA_U87clLAD_NG_051017	2491	Logarithmic
222	(Hex)3 (HexNAc)3 (NeuAc)1 + (Man)3(GlcNAc)2	Ambiguous	U87MG	1148.59	2299.19	2298.84	C87H146O64N6	0.35909	-2	[M-2H]	33.4	9.79	CA_U87clLAD_NG_051017	2520	Logarithmic
223	(Hex)3 (HexNAc)3 (NeuAc)2 + (Man)3(GlcNAc)2	Ambiguous	U87MG	1294.18	2590.37	2589.93	C98H163O72N7	0.443671	-2	[M-2H]	35.3	11	CA_U87clLAD_NG_051017	2647	Logarithmic
224	(Hex)3 (HexNAc)3 (NeuAc)2 + (Man)3(GlcNAc)2	Ambiguous	U87MG	1294.18	2590.37	2589.93	C98H163O72N7	0.443671	-2	[M-2H]	32.8	9.37	CA_U87clLAD_NG_051017	2472	Logarithmic
225	(Hex)3 (HexNAc)3 (NeuAc)3 + (Man)3(GlcNAc)2	Ambiguous	U87MG	1439.78	2881.57	2881.03	C109H180O80N8	0.548252	-2	[M-2H]	34.5	10.47	CA_U87clLAD_NG_051017	2583	Logarithmic
226	(Hex)3 (HexNAc)3 (NeuAc)3 + (Man)3(GlcNAc)2	Ambiguous	U87MG	1439.78	2881.57	2881.03	C109H180O80N8	0.548252	-2	[M-2H]	35.2	10.88	CA_U87clLAD_NG_051017	2638	Logarithmic
227	(Hex)3 (HexNAc)3 (NeuAc)3 + (Man)3(GlcNAc)2	Ambiguous	U87MG	1439.78	2881.57	2881.03	C109H180O80N8	0.548252	-2	[M-2H]	35.7	11.33	CA_U87clLAD_NG_051017	2677	Logarithmic
228	(Hex)3 (HexNAc)3 (NeuAc)3 + (Man)3(GlcNAc)2	Ambiguous	U87MG	1439.78	2881.57	2881.03	C109H180O80N8	0.548252	-2	[M-2H]	31.5	8.63	CA_U87clLAD_NG_051017	2374	Logarithmic
229	(HexNAc)3 (Deoxyhexose)1 + (Man)3(GlcNAc)2	Ambiguous	U87MG	832.92	1667.85	1667.64	C64H109O45N5	0.215074	-2	[M-2H]	29	7.35	CA_U87clLAD_NG_051017	2200	Logarithmic
230	(HexNAc)3 (Deoxyhexose)1 + (Man)3(GlcNAc)2	Ambiguous	U87MG	832.92	1667.85	1667.64	C64H109O45N5	0.215074	-2	[M-2H]	31.2	8.48	CA_U87clLAD_NG_051017	2363	Logarithmic
231	(Hex)4 (HexNAc)4 (Deoxyhexose)1 (NeuAc)1 + (Man)3(GlcNAc)2	Ambiguous	U87MG	1404.26	2810.53	2810.03	C107H179O78N7	0.508981	-2	[M-2H]	36.3	11.73	CA_U87clLAD_NG_051017	2703	Logarithmic
232	(Hex)4 (HexNAc)4 (Deoxyhexose)1 (NeuAc)1 + (Man)3(GlcNAc)2	Ambiguous	U87MG	1404.26	2810.53	2810.03	C107H179O78N7	0.508981	-2	[M-2H]	38.1	13.17	CA_U87clLAD_NG_051017	2838	Logarithmic
233	(Hex)4 (HexNAc)4 (Deoxyhexose)1 (NeuAc)1 + (Man)3(GlcNAc)2	Ambiguous	U87MG	1404.26	2810.53	2810.03	C107H179O78N7	0.508981	-2	[M-2H]	39.1	14.04	CA_U87clLAD_NG_051017	2911	Logarithmic
234	(Hex)4 (HexNAc)4 (Deoxyhexose)1 (NeuAc)2 + (Man)3(GlcNAc)2	Ambiguous	U87MG	1549.83	3101.67	3101.12	C118H196O86N8	0.553562	-2	[M-2H]	35.3	11	CA_U87clLAD_NG_051017	2643	Logarithmic
235	(Hex)4 (HexNAc)4 (Deoxyhexose)1 (NeuAc)2 + (Man)3(GlcNAc)2	Ambiguous	U87MG	1549.83	3101.67	3101.12	C118H196O86N8	0.553562	-2	[M-2H]	38.4	13.5	CA_U87clLAD_NG_051017	2862	Logarithmic
238	(Hex)4 (HexNAc)4 (Deoxyhexose)1 (NeuAc)3 (NeuGc)1 + (Man)3(GlcNAc)2	Ambiguous	U87MG	1232.32	3699.98	3699.31	C140H230O103N10	0.675081	-3	[M-3H]	37	12.33	CA_U87clLAD_NG_051017	2759	Logarithmic
239	(Hex)4 (HexNAc)4 (Deoxyhexose)1 (NeuAc)3 + (Man)3(GlcNAc)2	Ambiguous	U87MG	1695.41	3392.84	3392.22	C129H213O94N9	0.625343	-2	[M-2H]	36.3	11.73	CA_U87clLAD_NG_051017	2713	Logarithmic
240	(Hex)4 (HexNAc)4 (Deoxyhexose)1 (NeuAc)3 + (Man)3(GlcNAc)2	Ambiguous	U87MG	1695.41	3392.84	3392.22	C129H213O94N9	0.625343	-2	[M-2H]	37.4	12.62	CA_U87clLAD_NG_051017	2789	Logarithmic
243	(Hex)4 (HexNAc)4 (Deoxyhexose)1 (NeuAc)4 + (Man)3(GlcNAc)2	Ambiguous	U87MG	1226.97	3683.93	3683.31	C140H230O102N10	0.619996	-3	[M-3H]	37.1	12.4	CA_U87clLAD_NG_051017	2890	Logarithmic
244	(Hex)4 (HexNAc)4 (Deoxyhexose)1 + (Man)3(GlcNAc)2	Ambiguous	U87MG	1258.67	2519.35	2518.93	C96H162O70N6	0.4244	-2	[M-2H]	36.4	11.86	CA_U87clLAD_NG_051017	2717	Logarithmic
245	(Hex)4 (HexNAc)4 (NeuAc)4 + (Man)3(GlcNAc)2	Ambiguous	U87MG	1178.28	3537.86	3537.25	C134H220O98N10	0.607906	-3	[M-3H]	35.9	11.46	CA_U87clLAD_NG_051017	2689	Logarithmic
246	(Hex)5 (HexNAc)5 (Deoxyhexose)1 (NeuAc)3 + (Man)3(GlcNAc)2	Ambiguous	U87MG	1251.68	3758.06	3757.35	C143H236O104N10	0.713216	-3	[M-3H]	38.6	13.6	CA_U87clLAD_NG_051017	2873	Logarithmic
247	(Hex)5 (HexNAc)5 (Deoxyhexose)1 (NeuAc)3 + (Man)3(GlcNAc)2	Ambiguous	U87MG	1251.68	3758.06	3757.35	C143H236O104N10	0.713216	-3	[M-3H]	39	13.97	CA_U87clLAD_NG_051017	2895	Logarithmic
248	(Hex)5 (HexNAc)5 (Deoxyhexose)1 (NeuAc)4 + (Man)3(GlcNAc)2	Ambiguous	U87MG	1348.72	4049.18	4048.44	C154H253O112N11	0.737797	-3	[M-3H]	40.6	15.49	CA_U87clLAD_NG_051017	2967	Logarithmic
249	(Hex)5 (HexNAc)5 (Deoxyhexose)1 (NeuAc)4 + (Man)3(GlcNAc)2	Ambiguous	U87MG	1348.72	4049.18	4048.44	C154H253O112N11	0.737797	-3	[M-3H]	39.9	14.78	CA_U87clLAD_NG_051017	2962	Logarithmic
