# Supplementary material for: Standardization of PGC-LC-MS-based glycomics for sample specific glycotyping
Source: Royal Society of Chemistry journal article supplement (doi:10.1039/c9an00486f), 2019-01-01
Supplement: c9an00486f4.xlsx [file c9an00486f4.xlsx]

## Sheet: Skyline_norm_peak_areas
Class	Structure	U87MG_sec	HEK293_sec	BV2_sec	PC12_NCF_CL	BV2_CL	HEK293_CL	U87MG_CL	RVM_NT	PAG_NT	L5_NT	L4_NT	L3_NT
Paucimannose	(Hex)1 (HexNAc)2 (Deoxyhexose)1 (GU:5.84)	5.92702e-05	4.38779e-05	0.0020976	9.66393e-05	0.000195661	0.000189338	0.000188796	0.00102433	0.00386461	0.00411301	0.0103431	0.0082473
Paucimannose	(Hex)2 (HexNAc)2 (GU:4.87)	9.19023e-05	0.000223748	0.00187953	0.00500112	0.008568	0.00269228	0.00155516	0.0020974	0.00168928	0.0020683	0.00292846	0.00279007
Paucimannose	(Hex)3 (HexNAc)2 (GU:6.32)	0.000270129	0.000272467	0.000902343	0.00521407	0.0170146	0.00816171	0.00624599	0.00130439	0.00203945	0.00375785	0.00230269	0.00476007
Paucimannose	(Hex)2 (HexNAc)2 (Deoxyhexose)1 (GU:6.77)	0.00113283	0.000604375	0.0316724	0.0363533	0.0402268	0.0564509	0.0127616	0.00752039	0.0115141	0.00533105	0.0086853	0.00858236
Paucimannose	(Hex)3 (HexNAc)2 (Deoxyhexose)1 (GU:8.52)	0.0017269	0.00199056	0.00357685	0.071272	0.0385953	0.0956385	0.0528939	0.0208317	0.0258256	0.00762967	0.0086484	0.00629836
Complex	(Hex)1 (HexNAc)1 (Deoxyhexose)1 (NeuAc)1 + (Man)3(GlcNAc)2 (GU:7.39)	0.000549441	0.00078978	0.0127871	0.00462842	0.00623359	0.00807408	0.00172917	0.00297587	0.00239615	0.00783016	0.00484059	0.0154081
Complex	(Hex)1 (HexNAc)1 (Deoxyhexose)1 (NeuAc)1 + (Man)3(GlcNAc)2 (GU:9.32)	0.00112339	0.000749728	0.00606359	0.00590891	0.0021811	0.00414483	0.0124885	0.00381287	0.00369118	0.0114797	0.0142501	0.0139402
Complex	(HexNAc)1 (Deoxyhexose)1 + (Man)3(GlcNAc)2 (GU:9.42)	0.00062486	0.000749688	0.00190514	0.00458483	0.000419407	0.0135688	0.0086845	0.0103727	0.0153403	0.00740517	0.00650823	0.012621
Complex	(Hex)1 (HexNAc)2 (Deoxyhexose)1 + (Man)3(GlcNAc)2 (GU:8.26)	0.00060419	0.00155766	0.000393514	0.00809786	0.000597647	0.00326342	0.00455073	0.0147842	0.0225138	0.00834731	0.0139293	0.00764637
Complex	(Hex)1 (HexNAc)2 (Deoxyhexose)1 + (Man)3(GlcNAc)2 (GU:8.58)	0.000880393	0.000351373	0.00102763	0.00889822	0.000720706	0.00465953	0.00377538	0.0038444	0.00780788	0.0195803	0.00948807	0.0112709
Complex	(Hex)2 (HexNAc)2 (Deoxyhexose)1 (NeuAc)1 + (Man)3(GlcNAc)2 (GU:8.74)	0.000573867	0.0272927	0.0017756	0.0283731	0.0107955	0.0563896	0.0014415	0.00919697	0.00890322	0.0192926	0.00544512	0.0116733
Complex	(Hex)2 (HexNAc)2 (Deoxyhexose)1 (NeuAc)2 + (Man)3(GlcNAc)2 (GU:7.8)	0.00118671	0.00215439	0.00269976	0.0132854	0.0150889	0.00488269	0.000988784	0.00150245	0.00423033	0.00315028	0.00310051	0.0105731
Complex	(Hex)2 (HexNAc)2 (Deoxyhexose)1 + (Man)3(GlcNAc)2 (GU:6.8)	0.000278854	0.000318014	0.00131804	0.00169006	0.00179215	0.00239298	0.00103071	0.0195216	0.013689	0.0205905	0.00924825	0.0130202
Complex	(Hex)2 (HexNAc)2 (Deoxyhexose)1 + (Man)3(GlcNAc)2 (GU:9.26)	0.018495	0.0255448	0.00281987	0.0284508	0.00330143	0.0282333	0.118636	0.0104072	0.0211407	0.0225951	0.0476821	0.0215963
Complex	(Hex)2 (HexNAc)2 (NeuAc)1 (NeuGc)1 + (Man)3(GlcNAc)2 (GU:6.64)	0.00468298	0.00339242	0.0041149	0.00873181	0.00227489	0.000512939	0.000298436	0.00316998	0.00326861	0.0048268	0.00497302	0.0161074
Complex	(Hex)2 (HexNAc)2 (NeuAc)1 + (Man)3(GlcNAc)2 (GU:7)	0.0055086	0.00721637	0.00496611	0.00879256	0.0102036	0.0104005	0.00211218	0.0028659	0.00476886	0.00496563	0.0106902	0.0109034
Complex	(Hex)2 (HexNAc)2 (NeuAc)1 + (Man)3(GlcNAc)2 (GU:8.77)	0.00570506	0.00696666	0.00304594	0.00472138	0.00732031	0.0131713	0.0242435	0.00154752	0.00545902	0.013159	0.0157379	0.00388125
Complex	(Hex)2 (HexNAc)2 (NeuAc)2 + (Man)3(GlcNAc)2 (GU:6.75)	0.0302772	0.0261393	0.0287701	0.0864882	0.014197	0.00139746	0.00440835	0.00149619	0.00258317	0.00979007	0.00345207	0.0107056
Complex	(Hex)2 (HexNAc)2 + (Man)3(GlcNAc)2 (GU:7.89)	0.00239635	0.00313595	0.000655965	0.00360187	0.00280198	0.0067219	0.0148548	0.00163681	0.00256323	0.00428824	0.00576268	0.00764754
Complex	(Hex)3 (HexNAc)2 (NeuAc)1 + (Man)3(GlcNAc)2 (GU:8.15)	0.000741784	0.000602621	0.00703132	0.0120232	0.0503961	0.00149725	0.0016261	0.00791222	0.00491852	0.0152781	0.00502904	0.0137914
Complex	(Hex)3 (HexNAc)2 + (Man)3(GlcNAc)2 (GU:8.9)	0.000959378	0.000693577	0.00153975	0.00224286	0.00752147	0.00087495	0.00229095	0.00661661	0.0153006	0.0294007	0.0284836	0.0131255
Complex	(Hex)4 (HexNAc)2 + (Man)3(GlcNAc)2 (GU:10.39)	0.00134214	0.00103849	0.00765411	0.00418203	0.0432329	0.00254735	0.00289112	0.00523459	0.0069474	0.0200413	0.0109868	0.0221287
Complex	(HexNAc)2 (Deoxyhexose)1 + (Man)3(GlcNAc)2 (GU:7.58)	0.00102557	0.00148856	0.00175576	0.0324158	0.00875648	0.0145264	0.0112369	0.00851514	0.00666534	0.0102371	0.00947701	0.0105056
Complex	(HexNAc)2 (Deoxyhexose)1 + (Man)3(GlcNAc)2 (GU:7.26)	0.000375048	0.000269203	0.000336438	0.000358658	0.00045069	0.00820318	0.00292164	0.0984217	0.0905784	0.0143544	0.0284084	0.0164908
Complex	(Hex)2 (HexNAc)3 (Deoxyhexose)1 (NeuAc)1 + (Man)3(GlcNAc)2 (GU:9.02)	0.000302261	0.0041804	0.00027012	0.000994981	0.000399298	0.00347866	0.00148419	0.00342521	0.00613244	0.0047183	0.00359598	0.012778
Complex	(Hex)2 (HexNAc)3 (Deoxyhexose)1 + (Man)3(GlcNAc)2 (GU:6.78)	0.000245549	0.0120192	0.000157898	0.00243919	0.000197917	0.0111689	0.000394973	0.00301598	0.00149866	0.002065	0.00502234	0.00132294
Complex	(Hex)3 (HexNAc)3 (Deoxyhexose)1 (NeuAc)3 + (Man)3(GlcNAc)2 (GU:12.26)	0.0113881	0.0116468	0.000934428	0.0191223	0.00969299	0.0222102	0.038353	0.00210754	0.0150671	0.0358069	0.02041	0.0303215
Complex	(Hex)3 (HexNAc)3 (Deoxyhexose)1 + (Man)3(GlcNAc)2 (GU:11.07)	0.00293282	0.0066223	0.000404097	0.00263762	0.000442084	0.0105216	0.0320262	0.000599176	0.00461867	0.0105288	0.00763511	0.00592034
Complex	(Hex)3 (HexNAc)3 (Deoxyhexose)1 + (Man)3(GlcNAc)2 (GU:12.97)	0.0025809	0.0049118	0.000203388	0.00675988	0.000372881	0.0154211	0.0321851	0.00413791	0.0104993	0.0187973	0.0181478	0.00809923
Complex	(Hex)3 (HexNAc)3 (NeuAc)2 + (Man)3(GlcNAc)2 (GU:8.01)	0.00570833	0.00395621	0.00538835	0.0028823	0.00214523	0.000750771	0.0017339	0.00558974	0.00667002	0.0100683	0.0107355	0.0145697
Complex	(Hex)3 (HexNAc)3 (NeuAc)2 + (Man)3(GlcNAc)2 (GU:9.82)	0.0150271	0.0182954	0.0177531	0.00823573	0.010568	0.0146321	0.0131906	0.0086256	0.0140258	0.0391288	0.0195299	0.0161177
Complex	(Hex)3 (HexNAc)3 (NeuAc)2 + (Man)3(GlcNAc)2 (GU:11)	0.00723429	0.00744387	0.00768882	0.00495167	0.00615405	0.000562568	0.00243665	0.0039982	0.00451135	0.0143836	0.00706421	0.00334653
Complex	(Hex)3 (HexNAc)3 (NeuAc)2 + (Man)3(GlcNAc)2 (GU:12.56)	0.0252257	0.0250112	0.0270645	0.00574195	0.00385319	0.000370218	0.00605299	0.00216631	0.0030218	0.0029174	0.0101989	0.00999964
Complex	(Hex)3 (HexNAc)3 (NeuAc)3 + (Man)3(GlcNAc)2 (GU:11.33)	0.498607	0.393604	0.464833	0.171961	0.0979612	0.00910159	0.0709179	0.00295642	0.00248237	0.0321039	0.00429938	0.00485997
Complex	(Hex)3 (HexNAc)3 (NeuAc)3 + (Man)3(GlcNAc)2 (GU:9.42)	0.17332	0.12655	0.167702	0.0483716	0.0314037	0.0018106	0.0193119	0.000792935	0.0009616	0.0034666	0.00218165	0.00810903
Complex	(Hex)3 (HexNAc)3 (NeuAc)3 + (Man)3(GlcNAc)2 (GU:10.47)	0.0244192	0.0191165	0.0293294	0.0124968	0.00656542	0.00444973	0.00476462	0.0010135	0.0010641	0.00600024	0.00775159	0.00825223
Complex	(Hex)3 (HexNAc)3 (NeuAc)4 + (Man)3(GlcNAc)2 (GU:7.96)	0.0310493	0.0230581	0.029174	0.0101253	0.00671287	0.000625208	0.00674269	0.00162428	0.00329202	0.00127344	0.00213904	0.00970775
Complex	(HexNAc)3 (Deoxyhexose)1 + (Man)3(GlcNAc)2 (GU:5.73)	0.000133687	0.000708567	0.000222933	0.000443105	7.37561e-05	0.00128849	0.00105722	0.102227	0.0755999	0.0354628	0.0242138	0.010022
Complex	(Hex)4 (HexNAc)4 (Deoxyhexose)1 (NeuAc)1 + (Man)3(GlcNAc)2 (GU:13.17)	0.0030015	0.0142474	0.00076944	0.00517917	0.00336501	0.0316135	0.0416395	0.0054742	0.0150279	0.0236491	0.00630736	0.0271902
Complex	(Hex)4 (HexNAc)4 (Deoxyhexose)1 (NeuAc)1 + (Man)3(GlcNAc)2 (GU:14.04)	0.00170525	0.000836712	0.00164696	0.00205739	0.00198481	0.00410186	0.0156919	0.00513413	0.0117927	0.0166478	0.0237046	0.0181266
Complex	(Hex)4 (HexNAc)4 (Deoxyhexose)1 (NeuAc)2 + (Man)3(GlcNAc)2 (GU:11)	0.000653323	0.0067976	0.00036332	0.0013621	0.00251188	0.0185112	0.0309586	0.00274807	0.0094714	0.00927792	0.00362665	0.00642146
Complex	(Hex)4 (HexNAc)4 (Deoxyhexose)1 (NeuAc)3 + (Man)3(GlcNAc)2 (GU:12.62)	0.000230867	0.00404198	0.000253298	0.000859484	0.00250788	0.0152096	0.016245	0.00372855	0.00418229	0.0124805	0.00747173	0.00902858
Complex	(Hex)4 (HexNAc)4 (Deoxyhexose)1 (NeuAc)4 + (Man)3(GlcNAc)2 (GU:12.4)	0.00199581	0.0307017	0.000155527	0.012241	0.0363553	0.0740424	0.00114918	0.00100537	0.0148675	0.0059387	0.0136465	0.0168433
Complex	(Hex)4 (HexNAc)4 (Deoxyhexose)1 + (Man)3(GlcNAc)2 (GU:11.86)	0.000596707	0.0154378	0.000534854	0.00700675	0.00206667	0.0450624	0.041151	0.00387853	0.0126454	0.0266503	0.0269852	0.0265555
Complex	(Hex)4 (HexNAc)4 (NeuAc)4 + (Man)3(GlcNAc)2 (GU:11.46)	0.0176208	0.0101164	0.0155454	0.00655014	0.0187163	0.0101349	0.0119946	0.00371595	0.0100464	0.0297046	0.0255734	0.0245507
Complex	(Hex)5 (HexNAc)5 (Deoxyhexose)1 (NeuAc)4 + (Man)3(GlcNAc)2 (GU:15.49)	0.00088675	0.00227202	0.00162613	0.00984823	0.040935	0.0133355	0.0650402	0.00635134	0.00792863	0.00876578	0.0236522	0.0569622
Complex	(Hex)2 (HexNAc)3 (Deoxyhexose)1 (NeuAc)1 + (Man)3(GlcNAc)2 (GU:6.42)	0.00011822	0.00254785	0.000163186	0.00106486	0.000231037	0.00482509	0.000598509	0.00205638	0.00174854	0.00357899	0.00135478	0.00424842
Complex	(Hex)3 (HexNAc)3 (NeuAc)3 + (Man)3(GlcNAc)2 (GU:10.88)	0.000677483	0.00203139	0.000978073	0.00103455	0.000404707	0.00481407	0.000820619	0.000972679	0.00267169	0.00475794	0.00491611	0.00707012
Complex	(HexNAc)1 + (Man)3(GlcNAc)2 (GU:7.22)	0.000260446	0.000263676	0.000275818	0.000508466	0.00406292	0.0014562	0.00156906	0.00235494	0.000855849	0.00482098	0.00123956	0.00840689
Complex	(Hex)2 (HexNAc)2 (NeuAc)3 + (Man)3(GlcNAc)2 (GU:6.31)	0.00139952	0.00101541	0.00156051	0.000540981	0.000419294	0.000282821	0.000806477	0.000395078	0.00175262	0.00465657	0.00338898	0.00517648
Complex	(Hex)3 (HexNAc)3 + (Man)3(GlcNAc)2 (GU:9.53)	0.000142566	0.000846546	0.000406845	0.00070071	0.00208433	0.00264683	0.00285937	0.000930658	0.00218966	0.00808141	0.00437951	0.00469764
Complex	(Hex)1 (HexNAc)1 + (Man)3(GlcNAc)2 (GU:8)	0.00024377	0.00018261	0.000381291	0.00121313	0.00395806	0.00278686	0.00111142	0.00104228	0.00113441	0.00540251	0.00252534	0.00322992
Complex	(Hex)3 (HexNAc)3 (NeuAc)1 + (Man)3(GlcNAc)2 (GU:8.44)	0.000276307	0.000482831	0.000163616	0.000230424	0.00214689	0.00228547	0.00100693	0.00226107	0.000908598	0.00502138	0.00383155	0.00600246
Complex	(Hex)4 (HexNAc)4 (Deoxyhexose)1 (NeuAc)1 + (Man)3(GlcNAc)2 (GU:11.73)	0.000453516	0.00291783	7.07948e-05	0.00212571	0.00214861	0.0128939	0.00171191	0.000989505	0.00509981	0.00562693	0.00929142	0.0117619
Complex	(HexNAc)4 (Deoxyhexose)1 + (Man)3(GlcNAc)2 (GU:8.88)	0.000376518	0.000119177	0.00027715	0.00174375	0.00350089	0.00713192	0.00352121	0.00131021	0.00388084	0.00481319	0.0125422	0.0105776
Complex	(Hex)1 (HexNAc)3 (Deoxyhexose)1 + (Man)3(GlcNAc)2 (GU:8.82)	0.000238262	0.0105054	0.000150512	0.00041828	0.000256306	0.00414465	0.000781761	0.000798877	0.00324126	0.00196092	0.00928047	0.00521804
Complex	(Hex)1 (HexNAc)3 (Deoxyhexose)2 + (Man)3(GlcNAc)2 (GU:8.56)	0.000234227	0.0125686	0.000335268	0.000508853	0.000381774	0.00496454	0.00166338	0.00172448	0.00508461	0.00620615	0.00293163	0.00806473
Complex	(Hex)1 (HexNAc)3 (Deoxyhexose)2 + (Man)3(GlcNAc)2 (GU:8.27)	0.000313742	0.012437	0.000370677	0.000556631	0.00019515	0.00496454	0.000762043	0.00342715	0.0017518	0.00570396	0.00786279	0.0101399
Complex	(Hex)1 (HexNAc)3 (Deoxyhexose)3 (NeuAc)1 + (Man)3(GlcNAc)2 (GU:9.34)	0.000366367	0.00955999	0.00047209	0.00187243	0.00018116	0.00565955	0.00106533	0.00218763	0.00212893	0.00869294	0.00665556	0.00607272
Complex	(Hex)3 (HexNAc)3 (NeuAc)3 + (Man)3(GlcNAc)2 (GU:8.63)	0.0112333	0.00738393	0.00951522	0.00516416	0.00262541	0.000474853	0.00101523	0.00130554	0.00255392	0.00521786	0.00340913	0.00987963
Complex	(Hex)3 (HexNAc)3 (NeuAc)3 + (Man)3(GlcNAc)2 (GU:10.07)	0.00758079	0.00540035	0.00744148	0.00163013	0.00309991	0.000526921	0.00200449	0.00178159	0.00563746	0.00962656	0.00718858	0.00779836
Complex	(Hex)3 (HexNAc)3 (NeuAc)4 + (Man)3(GlcNAc)2 (GU:7.87)	0.0106197	0.0065652	0.00774113	0.00285281	0.00221271	7.36432e-05	0.000987847	0.00236692	0.00473863	0.0078316	0.00761027	0.00918927
Complex	(Hex)1 (HexNAc)3 + (Man)3(GlcNAc)2 (GU:5.11)	6.84503e-05	0.00094135	8.64249e-05	6.00688e-05	0.000107872	0.00147109	0.000174177	0.00138441	0.00138215	0.00365855	0.00229777	0.000904923
Complex	(Hex)1 (HexNAc)3 + (Man)3(GlcNAc)2 (GU:7.7)	0.000247658	0.00182095	6.72295e-05	0.000115261	7.92574e-05	0.00105688	0.000321463	0.00112606	0.00140225	0.00197024	0.00542127	0.00442541
Complex	(HexNAc)4 + (Man)3(GlcNAc)2 (GU:7.33)	0.000287221	0.000106204	0.000193119	0.000467529	0.00137874	0.000995467	0.000692971	0.00074279	0.00222273	0.00271931	0.0068182	0.00138262
Complex	(Hex)2 (HexNAc)2 + (Man)3(GlcNAc)2 (GU:5.44)	0.00021753	0.000499013	0.000150385	0.000458213	0.000238741	0.000967565	0.000270702	0.00337103	0.00638935	0.00660623	0.00619963	0.00283502
Complex	(HexNAc)3 + (Man)3(GlcNAc)2 (GU:4.53)	0.000107888	0.000271686	4.15007e-05	4.41259e-05	0.000112573	0.000413638	0.000430959	0.00688865	0.0078984	0.00400086	0.00410438	0.00194751
Complex	(Hex)3 (HexNAc)3 (Deoxyhexose)1 (NeuAc)1 + (Man)3(GlcNAc)2 (GU:10.72)	0.000461393	0.000951654	0.000355312	0.00233118	0.000701528	0.00698207	0.00135132	0.00269897	0.00759921	0.0110942	0.00981112	0.00673716
Complex	(Hex)3 (HexNAc)3 + (Man)3(GlcNAc)2 (GU:10.33)	0.000194963	0.000405424	0.000412981	0.000856322	0.0011421	0.00274611	0.00167451	0.00165853	0.00365466	0.0157154	0.00433176	0.0051208
Complex	(Hex)1 (HexNAc)3 (Deoxyhexose)1 + (Man)3(GlcNAc)2 (GU:6.11)	0.000110934	0.00104538	4.42777e-05	0.000101316	8.65669e-05	0.00108735	0.000912477	0.00608685	0.00309834	0.00647042	0.0130948	0.00250972
Complex	(Hex)1 (HexNAc)1 (NeuAc)1 + (Man)3(GlcNAc)2 (GU:6.11)	0.000742968	0.000569547	0.00181571	0.00153611	0.00698037	0.00115341	0.00170085	0.00134224	0.00142387	0.00356527	0.00870342	0.00439977
Complex	(HexNAc)1 (Deoxyhexose)1 + (Man)3(GlcNAc)2 (GU:6.86)	0.000163825	0.000402825	8.5304e-05	0.00086284	0.00106763	0.00142628	0.00103239	0.00398722	0.00278773	0.00551326	0.00826148	0.00631063
Complex	(Hex)1 (HexNAc)2 (NeuAc)1 + (Man)3(GlcNAc)2 (GU:6.53)	0.00087972	0.000390163	0.000900288	0.00140661	0.00335943	0.000920278	0.00111626	0.0023895	0.0015787	0.00542319	0.00752337	0.0044626
Complex	(HexNAc)3 (Deoxyhexose)1 + (Man)3(GlcNAc)2 (GU:7.35)	0.000195174	0.000702579	0.000687639	0.00311316	0.00386944	0.0069506	0.00711516	0.00545174	0.00363254	0.00897872	0.0115679	0.0194216
Complex	(Hex)1 (HexNAc)1 (NeuAc)1 + (Man)3(GlcNAc)2 (GU:7.77)	0.000522538	0.0007404	0.000672085	0.00178084	0.00257629	0.00149553	0.00404481	0.00170667	0.00708998	0.0100137	0.014032	0.0131601
Complex	(HexNAc)3 (Deoxyhexose)1 + (Man)3(GlcNAc)2 (GU:8.48)	8.94971e-05	0.000135462	0.000514968	0.00154896	0.0019623	0.00366756	0.00297268	0.0038584	0.00626262	0.00511816	0.0143859	0.0135638
Complex	(Hex)2 (HexNAc)2 (NeuAc)2 + (Man)3(GlcNAc)2 (GU:9.87)	0.00660202	0.0038335	0.00518287	0.00156135	0.00165731	0.00349599	0.002389	0.00399012	0.0105429	0.0134941	0.0198128	0.01104
Complex	(Hex)3 (HexNAc)3 (NeuAc)2 (NeuGc)2 + (Man)3(GlcNAc)2 (GU:9.58)	0.00997682	0.00797165	0.00509917	0.00356438	0.00267205	0.000309439	0.00149659	0.00524503	0.00531883	0.0174725	0.0208617	0.00584886
Hybrid	(Hex)3 (HexNAc)1 + (Man)3(GlcNAc)2 (GU:7.55)	0.000354163	0.000215499	0.000602673	0.00111885	0.00768451	0.000491347	0.00117406	0.00204908	0.00417115	0.00493579	0.00834535	0.00396036
Hybrid	(Hex)4 (HexNAc)2 (Deoxyhexose)1 (GU:7.95)	0.000195738	0.000142336	0.000399706	0.00353381	0.00064295	0.00273025	0.00108764	0.00463966	0.00171623	0.00444137	0.00091373	0.00262065
Hybrid	(Hex)3 (HexNAc)2 (Deoxyhexose)2 + (Man)3(GlcNAc)2 (GU:10.07)	0.000313664	0.000431808	0.000168141	9.45306e-05	0.000361271	0.000576751	0.00063756	0.00118007	0.0019458	0.00601861	0.00282895	0.00450961
Hybrid	(Hex)4 (HexNAc)1 (NeuAc)1 + (Man)3(GlcNAc)2 (GU:6.59)	0.000105699	0.000218026	4.67921e-05	0.000255864	0.00122378	0.000351127	0.000324614	0.000256992	0.00130717	0.00513087	0.00247951	0.00650358
Hybrid	(Hex)2 (HexNAc)1 (NeuAc)1 + (Man)3(GlcNAc)2 (GU:7.59)	0.00385342	0.00424345	0.00407926	0.00479528	0.0159091	0.00567019	0.00668727	0.00145964	0.00534572	0.00189408	0.00371652	0.00571112
Hybrid	(Hex)3 (HexNAc)1 (NeuAc)1 + (Man)3(GlcNAc)2 (GU:6.46)	0.00164586	0.00265095	0.00221096	0.00771518	0.0175818	0.00536217	0.00103672	0.00404611	0.00235311	0.00286457	0.00647075	0.0087023
Hybrid	(Hex)2 (Deoxyhexose)1 + (Man)3(GlcNAc)2 (GU:9.06)	0.000259708	0.000353286	0.000492569	0.00817473	0.00372426	0.00598616	0.0043864	0.00997127	0.00398749	0.00642073	0.00384963	0.00832415
Hybrid	(Hex)3 (HexNAc)1 + (Man)3(GlcNAc)2 (GU:6.89)	0.00177381	0.00384389	0.00151277	0.00779646	0.00830532	0.0102324	0.011298	0.00661798	0.0037512	0.00689963	0.00717237	0.00786008
Hybrid	(Hex)3 (HexNAc)1 (NeuAc)1 + (Man)3(GlcNAc)2 (GU:8.13)	0.0132975	0.0123804	0.0118895	0.00220476	0.0203579	0.00628659	0.00368572	0.00102243	0.00539437	0.0122117	0.0157149	0.0160361
Hybrid	(Hex)4 (HexNAc)1 + (Man)3(GlcNAc)2 (GU:8.42)	0.000425823	0.000576687	0.00309984	0.00830026	0.0304813	0.00027942	0.00116252	0.000608026	0.0027331	0.00997945	0.00684198	0.00630735
High mannose	(Hex)2 + (Man)3(GlcNAc)2 (GU:7)	0.00467968	0.0103276	0.00570347	0.0319534	0.0607223	0.0340945	0.0216246	0.238353	0.126361	0.0285987	0.0333441	0.031397
High mannose	(Hex)4 + (Man)3(GlcNAc)2 (GU:6.09)	0.00105964	0.000917922	0.00117908	0.00712769	0.0104055	0.00874632	0.012856	0.0185137	0.0135054	0.00390493	0.0177583	0.00663976
High mannose	(Hex)4 (HexNAc)2 (GU:3.57)	0.000413157	0.000169478	0.000315232	7.39948e-05	0.000110094	0.000400269	0.000243412	0.000579122	0.00171281	0.000854552	0.00388587	0.00134716
High mannose	(Hex)2 + (Man)3(GlcNAc)2 (GU:6.27)	0.000269866	0.000124651	0.000376007	0.0019772	0.00212446	0.00118417	0.000909878	0.00309526	0.00517807	0.00219945	0.00189912	0.00671998
High mannose	(Hex)4 (HexNAc)2 (GU:5.6)	6.4506e-05	0.000199077	0.00045701	0.00326573	0.00584968	0.00141315	0.000344141	0.00267918	0.00399652	0.00480856	0.00269041	0.00438935
High mannose	(Hex)5 + (Man)3(GlcNAc)2 (GU:5.82)	0.000264573	0.000191425	0.00059941	0.00211704	0.00449848	0.00363697	0.00173759	0.00431745	0.00603832	0.00240786	0.00323083	0.0024416
High mannose	(Hex)4 (HexNAc)2 (GU:5.96)	0.00079183	0.000485684	0.000598001	0.00331199	0.00369349	0.00248169	0.00198202	0.00450566	0.00567085	0.0115145	0.013202	0.00726849
High mannose	(Hex)3 + (Man)3(GlcNAc)2 (GU:7.43)	0.000343261	0.000225682	0.000315093	0.00101195	0.000905566	0.00114016	0.00146459	0.00255718	0.00562227	0.00985387	0.0074301	0.00297612
High mannose	(Hex)4 (HexNAc)2 (GU:7.05)	0.000111332	0.000407079	0.000291378	0.00122702	0.00256101	0.0012669	0.00014062	0.00865066	0.00687852	0.00736436	0.0081729	0.00269541
High mannose	(Hex)3 + (Man)3(GlcNAc)2 (GU:5.8)	0.00117215	0.00176633	0.00218352	0.0296189	0.0272266	0.015801	0.0120135	0.0356029	0.0280594	0.00529789	0.00656654	0.00537663
High mannose	(Hex)4 + (Man)3(GlcNAc)2 (GU:5.86)	0.00173665	0.00326285	0.00451702	0.0351017	0.0485412	0.0240485	0.0237666	0.0340796	0.032558	0.00776594	0.0130533	0.0109291
High mannose	(Hex)5 + (Man)3(GlcNAc)2 (GU:5.96)	0.00294407	0.00354667	0.00445022	0.0254186	0.0375577	0.0540364	0.0454125	0.0441719	0.0387696	0.00660718	0.0213888	0.0137374
High mannose	(Hex)6 + (Man)3(GlcNAc)2 (GU:5.85)	0.00304323	0.00254109	0.00508898	0.0441506	0.0557587	0.0617142	0.047665	0.0722807	0.0521751	0.0148629	0.0191148	0.00912213
