# Supplementary material for: Standardization of PGC-LC-MS-based glycomics for sample specific glycotyping
Source: Royal Society of Chemistry journal article supplement (doi:10.1039/c9an00486f), 2019-01-01
Supplement: c9an00486f5.xlsx [file c9an00486f5.xlsx]

## Sheet: MIRAGE-SamplePrep
	MIRAGE MS Guidelines
	Guidelines for reporting mass spectrometric analysis data of glycans
	Provide the information below. When more than one element has to be reported (e.g. Enzymatic or chemical treatments), please continue in the adjacent columns.
	Required fields are marked with an * (If the field is not relevant for the experiment, it can be filled in with a 'NA' -Not applicable).
General features — (a) Global descriptors
*	Date stamp	2019-01-28
*	Responsible person. Provide name,	Christopher Ashwood
*	Affiliation	Medical College of Wisconsin, USA
*	Stable contact information	chrashwood@gmail.com
1. Sample Origin
	Here “sample” is defined as any carbohydrate, polysaccharide, oligosaccharide or glycoconjugate that originates from any given starting material. The starting material may be a compound, mixture or cell product used to produce the oligosaccharide sample of interest. The source and/or methods used to produce the starting sample material can vary considerably but minimum information that describes …
*	General Information	N-glycans and O-glycans released from purified, secreted and cellular proteins. Cellular proteins include those from cell culture as well as from tissue.
	1.1 Biologically derived material
	Biologically derived material - Recombinantly produced material
	Cell type
	Growth/harvest conditions. Other modifications.
	Biologically derived material - Biological origin of Material
	Origin (biological fluid, tissue, etc)	Cell Line
	Species	Homo Sapiens
	Describe treatments and/or storage conditions	The U87MG, HEK293 and BV2 cell lines were cultured in T-75 flasks with 10mL of Dulbecco’s Modified Eagle’s Medium supplemented with 10% (v/v) fetal bovine serum. The PC-12 cell line was cultured in similar conditions with slight modifications, using 10 mL of RPMI-1640 Medium supplemented with 10% (v/v) heat-inactivated horse serum, 5% (v/v) fetal bovine serum and 50ng/mL neural growth factor. Aft…
	Glycoprotein
	Biologically derived material - Purchased from commercial manufacturer
	Vendor and applicable item information	Bovine ribonuclease B (product#:R7884), porcine gastric mucin (product#:M1778), human IgA (product#:I1010), bovine lactoferrin (product#:L9507), human lactoferrin (product#:L0520), bovine fetuin (product#:F3385) and human IgG (product#:I4506) were sourced from Sigma Aldrich (Sydney, Australia). Human neutrophil elastase (product#:342-40) was sourced from LeeBio (Maryland Heights, USA). Fungal cel…
	1.2 Chemically derived material
	Synthesis steps or specify where the equivalent reaction protocol is available.	10 mg of Dextran T2000 (Amersham Pharmacia Biotech AB, Uppsala, Sweden) was dissolved in 1 mL of 1 M trifluoroacetic acid (TFA) and held at 80 ˚C for 30 min. After this partial acid hydrolysis18, the sample was dried by centrifugal evaporation at room temperature.
	Description of starting material	Free-Oligosaccharides
2. Sample Processing
	2.1 Sample Processing – Isolation
	Enzymatic treatments
	Enzymes used for oligosaccharide removal or modification of starting material	Release method-PNGaseF TREATMENT
	Describe vendor or expression and purification procedure	Promega
	Sample material treated in-solution or immobilized? State also temperature, duration, volume, enzyme concentration	N-glycans were released using 1 unit PNGase-F (Promega, Sydney, Australia) at 37 °C, overnight.
	Chemical treatments
	Define the technique for oligosaccharide release or other chemical modifications.	Release method-REDUCTIVE BETA ELIMINATION
	Reaction conditions (temperature, duration, volume and chemical concentrations).	500 mM NaBH4 in 50 mM KOH solution was added to immobilised protein spots for 16 h to release reduced O-linked glycans by reductive β-elimination.
	2.2 Sample Processing – Modification
	Enzymatic modifications
	Describe any treatments made to the isolated material.
	Enzyme concentration, supplier, biological source, incubation time and temperature.
	If novel glycosidase was used, provide information indicating the origin (i.e. species) of the enzyme.
	Chemical modifications
	Describe any treatments made to the isolated material.	Labelling-REDUCTION
	Explain the type of modification employed	Reduction of reducing end.
	Source of materials, description of kits used, reaction conditions and detailed workflow	30uL of 1M NaBH4 in 50mM KOH added to dried N-glycan samples and incubated @ 50C for 3 hours.
	2.2 Sample Processing – Purification
	Purification steps	Released N-glycans were reduced and both N-glycans and O-glycans were desalted and enriched offline using AG 50W-X8 (Bio-Rad, Sydney, Australia) strong cation exchange followed by PGC solid phase extraction micro-columns (Thermo Scientific, Sydney, Australia).
3. Defined Sample
	Sample name	Oligosaccharides

## Sheet: LC-PartOfMS
	LC-MS Settings
	For uploading of data to UniCarb-DB
	Please provide the information below.
	Required fields are marked with an * (If the field is not relevant for the experiment, it can be filled in with a 'NA' -Not applicable).
General features — (a) Global descriptors
*	Date stamp	2019-01-28
*	Responsible person. Provide name,	Christopher Ashwood
*	Affiliation	Medical College of Wisconsin, USA
*	Stable contact information	chrashwood@gmail.com
1. HPLC
	HPLC manufacturer	Thermo Fisher
	HPLC brand	1100 Series
	Injector
	Injector settings
2. Method run
	Temperature	50
*	Solvent a	10mM Ammonium bicarbonate
*	Solvent b	10 mM ammonium bicarbonate aqueous solution with 70% (v/v) acetonitrile
	Other solvent
*	Flow rate	4 ul/min
	Flow gradient	Two gradients were used for normalisation experiments with the first as follows: 0-4.9 min, 1% B; 4.9-50 min, linear increase up to 45.2% B; 50-55 min, held at 99% B; 55-60 min, equilibrated at 1% B for 5 min before next injection - giving a total LC run time of 60 min. The second gradient, simulating reduced glycan retention, was the the same except 0-4.9 min was at 8% B. The gradient used for b…
	Run time	83
*	Phase	Reversed
3. Column
	Manufacturer	Thermo Fisher
	Model	Hypercarb
	Type of chromatography	Reversed phase
	Type of material	Porous Graphitized Carbon
	Column diameter	0.18
	Column length	100
	Particle size	3

## Sheet: MIRAGE-MS
	MIRAGE MS Guidelines
	Guidelines for reporting mass spectrometric analysis data of glycans
	Provide the information below. When more than one element has to be reported (e.g. Software or files), please continue in the adjacent columns.
	Required fields are marked with an * (If the field is not relevant for the experiment, it can be filled in with a 'NA' -Not applicable).
1. General features
	1. General features — (a) Global descriptors
*	Date stamp	2019-01-28
*	Responsible person. Provide name,	Christopher Ashwood
*	Affiliation	Medical College of Wisconsin, USA
*	Stable contact information	chrashwood@gmail.com
	Instrument manufacturer	Thermo Fisher
	Instrument model	Scientific Velos Plus
	Customizations	N/A
	Ion mode	Negative
	1. General features — (b) Control and analysis software
	Software name	Xcalibur
	Version	3.0
	Manufacturer	Thermo Finnigan
	Availability	Propietary
	Upgrades not reflected in version number	N/A
	Switching criteria (tandem only)	DDA, Top 5
	Isolation width (global, or by MS level)	2
	Location of ‘parameters’ file	S-1 PGC LC ESI MSMS Methods (PDF)
2. Ion sources
	2. Ion sources — (a) Electrospray Ionisation (ESI)
*	Supply type (static, or fed)	LC fed
	Interface name	HESI-II source
	Catalog number, vendor, and any modifications made to the standard specification.	IQLAAEGABBFACNMAGY, Thermo Fisher Scientific.
*	Sprayer name	Low flow metal insert
	Sprayer type, coating, manufacturer, model and catalog number (where available)	Using OPTON-53011 low flow metal needle insert, Thermo Fisher Scientific.
	Relevant voltages where appropriate (tip, cone, acceleration)	2700V on tip
	Degree of prompt fragmentation evaluated	Yes
	Whether in-source dissociation performed	No
	Other parameters if discriminant for the experiment (such as nebulizing gas and pressure )
	2. Ion sources — (b) MALDI
*	Plate composition (or type)	NA
*	Matrix composition (if applicable)	NA
*	Deposition technique	NA
*	Relevant voltages where appropriate	NA
	Degree of prompt fragmentation evaluated	NA
	PSD (or LID/ISD) summary, if performed	NA
*	Operation with or without delayed extraction	NA
*	Laser type (e.g., nitrogen) and wavelength (nm)	NA
	Other laser related parameters, if discriminating for the experiment	NA
3. Ion transfer optics
	Hardware options	Octopole
	3. Post-source componentry — (a) Collision cell
	Collision-Induced Dissociation (CID)
*	Gas composition	Helium
	Gas pressure
*	Collision energy CID/function	33% Normalized collision energy
	Electron Transfer Dissociation (ETD)
	Reagent gas	NA
	Pressure	NA
	Reaction time	NA
	Number of reagent atoms	NA
	Electron Capture Dissociation (ECD)
*	Emitter type	NA
	Voltage	NA
	Current	NA
	3. Post-source componentry — (b) TOF drift tube
*	Reflectron status (on, off, none)	NA
	3. Post-source componentry — (c) Ion trap
	Final MS stage achieved	2
	3. Post-source componentry – (d) Ion mobility
*	Gas	NA
	Pressure	NA
	Instrument-specific parameters	NA
	3. Post-source componentry — (e) FT-ICR
	Peak selection	NA
	Pulse	NA
	Width	NA
	Voltage	NA
	Decay time	NA
	IR	NA
	Other parameters	NA
	3. Post-source componentry — (f) Detectors
	Detector type	Electron multiplier
4. Spectrum and peak list generation and annotation
	For this section, if software other than that listed in 1b (Control and analysis software) is used to perform a task, it must be supplied in each case.
	Software name	GlycoWorkBench
	Version	2.1
	Manufacturer	Imperial College London
	Availability	Open Source
	4. Spectrum and peak list generation and annotation — (a) Spectrum description
	Location of source (‘raw’) files
	Name	S-3 Annotated_MS2_GlycoWorkBench.rar
	Format	RAR
	Identifying information for the target area	https://panoramaweb.org/project/Macquarie%20U%20-%20Glyco%20Lab/Dextran%20ladder%20internal%20standard%20glycomics%20manuscript/begin.view?
	URL	https://panoramaweb.org/project/Macquarie%20U%20-%20Glyco%20Lab/Dextran%20ladder%20internal%20standard%20glycomics%20manuscript/begin.view?
	4. Peak list generation and annotation — (b) Peak list generation
	Since several different applications may be used for the data acquisition, data post processing and spectrum annotation each used software should be recorded separately together with the information what modification has been done to the data.
	Software name	Xcalibur
	Version	3.0
	Manufacturer	Thermo Finnigan
	Availability	Propietary
	Customizations made to the software	N/A
	Software settings	N/A
	Data file
	Name	File names described in supp file
	Format	Raw
	URL	https://panoramaweb.org/project/Macquarie%20U%20-%20Glyco%20Lab/Dextran%20ladder%20internal%20standard%20glycomics%20manuscript/begin.view?
	Acquisition number (from the ‘raw’ file) for all acquisitions combined in the peak list, total number and whether summed or averaged.	N/A
	Parameters triggering the generation of peak lists from raw data, where appropriate	Proteowizard
	Raw data scoring	Manual
	Smoothing; whether applied, parameters	Not applied
	Background threshold, or algorithm used	Skyline default
	Signal-to-noise estimation and method	N/A
	Percentage peak height for centroiding; or algorithm used, if appropriate	N/A
	Retention times for all acquisitions combined in the peak list	N/A
	m/z and intensity values	N/A
	4. Peak list generation and annotation — (c) Annotation and scoring
	Since several different applications may be used for the data acquisition, data post processing and spectrum annotation each used software should be recorded separately together with the information what modification has been done to the data.
	Software name	GlycoWorkBench
	Version	2.1
	Manufacturer	Thermo Finnigan
	Availability	Propietary
	Software type	Annotation
	Customizations made to the software	N/A
	Software settings	3 Possible glycosidic cleavages, 1 cross-ring cleavage
	Data file generated by the software
	Name	Annotated_structures
	Format	GWP
	URI	https://panoramaweb.org/project/Macquarie%20U%20-%20Glyco%20Lab/Dextran%20ladder%20internal%20standard%20glycomics%20manuscript/begin.view?
	Database matching
	Database settings
	Database queried	UniCarb-DB
	Taxonomical restrictions	Homo sapiens and Sus scrofa
	Other restrictions	N/A
	Allowed cleavages	N/A
	Mass accuracy
	Parent error	m/z 0.35
	Fragment error	m/z 0.5
	Scoring method	Manual
	Scoring value format	Manual
	Scoring algorithm	Manual
	Scoring result	Manual
	Validation
	Validation status	Precursor mass, retention time order, best possible MS2 match for possible structures
	Validation value format	Manual
	Validation result	Manual
	Validation level

## Sheet: MIRAGE-MSn
	MIRAGE MS Guidelines
	Guidelines for reporting mass spectrometric analysis data of glycans
	The following lines have to be repeated for each identified feature in the mass spectrum.
								Database matching											Validation
Scan number	MS level	Prec m/z and charge	Stability	Accession code	Structure	Orthogonal approaches	Quantity	Database queried	Taxonomical restrictions	Other restrictions	Allowed cleavages	Mass accuracy	Parent error	Fragment error	Scoring method	Scoring value format	Scoring algorithm	Scoring result	Validation status	Validation value format	Validation result
805	2	1114.52		G48421GV		PGC-specific RT patterns		UniCarb-DB	Homo sapiens and Sus scrofa	N/A	N/A		m/z 0.35	m/z 0.5	Manual	Manual	Manual	Manual	Precursor mass, retention time order, best possible MS2 match for possible structures	Manual	Manual
915		1276.56		G14831JP		PGC-specific RT patterns		UniCarb-DB	Homo sapiens and Sus scrofa	N/A	N/A		m/z 0.35	m/z 0.5	Manual	Manual	Manual	Manual	Precursor mass, retention time order, best possible MS2 match for possible structures	Manual	Manual
1089		1114.52		G48522XQ		PGC-specific RT patterns		UniCarb-DB	Homo sapiens and Sus scrofa	N/A	N/A		m/z 0.35	m/z 0.5	Manual	Manual	Manual	Manual	Precursor mass, retention time order, best possible MS2 match for possible structures	Manual	Manual
797		587.24		G55486HO		PGC-specific RT patterns		UniCarb-DB	Homo sapiens and Sus scrofa	N/A	N/A		m/z 0.35	m/z 0.5	Manual	Manual	Manual	Manual	Precursor mass, retention time order, best possible MS2 match for possible structures	Manual	Manual
1235		911.39		G92707AV		PGC-specific RT patterns		UniCarb-DB	Homo sapiens and Sus scrofa	N/A	N/A		m/z 0.35	m/z 0.5	Manual	Manual	Manual	Manual	Precursor mass, retention time order, best possible MS2 match for possible structures	Manual	Manual
1305		739.35		G50392AV		PGC-specific RT patterns		UniCarb-DB	Homo sapiens and Sus scrofa	N/A	N/A		m/z 0.35	m/z 0.5	Manual	Manual	Manual	Manual	Precursor mass, retention time order, best possible MS2 match for possible structures	Manual	Manual
1345		1073.46		G85626DA		PGC-specific RT patterns		UniCarb-DB	Homo sapiens and Sus scrofa	N/A	N/A		m/z 0.35	m/z 0.5	Manual	Manual	Manual	Manual	Precursor mass, retention time order, best possible MS2 match for possible structures	Manual	Manual
1335		1276.56		G17483QF		PGC-specific RT patterns		UniCarb-DB	Homo sapiens and Sus scrofa	N/A	N/A		m/z 0.35	m/z 0.5	Manual	Manual	Manual	Manual	Precursor mass, retention time order, best possible MS2 match for possible structures	Manual	Manual
939		571.27		G39791JK		PGC-specific RT patterns		UniCarb-DB	Homo sapiens and Sus scrofa	N/A	N/A		m/z 0.35	m/z 0.5	Manual	Manual	Manual	Manual	Precursor mass, retention time order, best possible MS2 match for possible structures	Manual	Manual
1356		1317.59		G50071YW		PGC-specific RT patterns		UniCarb-DB	Homo sapiens and Sus scrofa	N/A	N/A		m/z 0.35	m/z 0.5	Manual	Manual	Manual	Manual	Precursor mass, retention time order, best possible MS2 match for possible structures	Manual	Manual
1343		759.86		G31411IU		PGC-specific RT patterns		UniCarb-DB	Homo sapiens and Sus scrofa	N/A	N/A		m/z 0.35	m/z 0.5	Manual	Manual	Manual	Manual	Precursor mass, retention time order, best possible MS2 match for possible structures	Manual	Manual
1379		952.44		Ambiguous		PGC-specific RT patterns		UniCarb-DB	Homo sapiens and Sus scrofa	N/A	N/A		m/z 0.35	m/z 0.5	Manual	Manual	Manual	Manual	Precursor mass, retention time order, best possible MS2 match for possible structures	Manual	Manual
1445		911.39		Ambiguous		PGC-specific RT patterns		UniCarb-DB	Homo sapiens and Sus scrofa	N/A	N/A		m/z 0.35	m/z 0.5	Manual	Manual	Manual	Manual	Precursor mass, retention time order, best possible MS2 match for possible structures	Manual	Manual
1444		1276.56		G17483QF		PGC-specific RT patterns		UniCarb-DB	Homo sapiens and Sus scrofa	N/A	N/A		m/z 0.35	m/z 0.5	Manual	Manual	Manual	Manual	Precursor mass, retention time order, best possible MS2 match for possible structures	Manual	Manual
1063		749.34		G13947MP		PGC-specific RT patterns		UniCarb-DB	Homo sapiens and Sus scrofa	N/A	N/A		m/z 0.35	m/z 0.5	Manual	Manual	Manual	Manual	Precursor mass, retention time order, best possible MS2 match for possible structures	Manual	Manual
1511		840.86		G72261BF		PGC-specific RT patterns		UniCarb-DB	Homo sapiens and Sus scrofa	N/A	N/A		m/z 0.35	m/z 0.5	Manual	Manual	Manual	Manual	Precursor mass, retention time order, best possible MS2 match for possible structures	Manual	Manual
1517		1235.58		Ambiguous		PGC-specific RT patterns		UniCarb-DB	Homo sapiens and Sus scrofa	N/A	N/A		m/z 0.35	m/z 0.5	Manual	Manual	Manual	Manual	Precursor mass, retention time order, best possible MS2 match for possible structures	Manual	Manual
1649		986.44		Ambiguous		PGC-specific RT patterns		UniCarb-DB	Homo sapiens and Sus scrofa	N/A	N/A		m/z 0.35	m/z 0.5	Manual	Manual	Manual	Manual	Precursor mass, retention time order, best possible MS2 match for possible structures	Manual	Manual
1551		840.86		G38843SX		PGC-specific RT patterns		UniCarb-DB	Homo sapiens and Sus scrofa	N/A	N/A		m/z 0.35	m/z 0.5	Manual	Manual	Manual	Manual	Precursor mass, retention time order, best possible MS2 match for possible structures	Manual	Manual
1576		864.37		G38155ZN		PGC-specific RT patterns		UniCarb-DB	Homo sapiens and Sus scrofa	N/A	N/A		m/z 0.35	m/z 0.5	Manual	Manual	Manual	Manual	Precursor mass, retention time order, best possible MS2 match for possible structures	Manual	Manual
1563		840.86		G62621XS		PGC-specific RT patterns		UniCarb-DB	Homo sapiens and Sus scrofa	N/A	N/A		m/z 0.35	m/z 0.5	Manual	Manual	Manual	Manual	Precursor mass, retention time order, best possible MS2 match for possible structures	Manual	Manual
1614		1276.56		G87422MU		PGC-specific RT patterns		UniCarb-DB	Homo sapiens and Sus scrofa	N/A	N/A		m/z 0.35	m/z 0.5	Manual	Manual	Manual	Manual	Precursor mass, retention time order, best possible MS2 match for possible structures	Manual	Manual
1593		759.86		G21251LN		PGC-specific RT patterns		UniCarb-DB	Homo sapiens and Sus scrofa	N/A	N/A		m/z 0.35	m/z 0.5	Manual	Manual	Manual	Manual	Precursor mass, retention time order, best possible MS2 match for possible structures	Manual	Manual
1617		1438.66		G57540FR		PGC-specific RT patterns		UniCarb-DB	Homo sapiens and Sus scrofa	N/A	N/A		m/z 0.35	m/z 0.5	Manual	Manual	Manual	Manual	Precursor mass, retention time order, best possible MS2 match for possible structures	Manual	Manual
1405		733.35		G39615UL		PGC-specific RT patterns		UniCarb-DB	Homo sapiens and Sus scrofa	N/A	N/A		m/z 0.35	m/z 0.5	Manual	Manual	Manual	Manual	Precursor mass, retention time order, best possible MS2 match for possible structures	Manual	Manual
1221		1114.52		Unspecified		PGC-specific RT patterns		UniCarb-DB	Homo sapiens and Sus scrofa	N/A	N/A		m/z 0.35	m/z 0.5	Manual	Manual	Manual	Manual	Precursor mass, retention time order, best possible MS2 match for possible structures	Manual	Manual
1671		1067.49		Ambiguous		PGC-specific RT patterns		UniCarb-DB	Homo sapiens and Sus scrofa	N/A	N/A		m/z 0.35	m/z 0.5	Manual	Manual	Manual	Manual	Precursor mass, retention time order, best possible MS2 match for possible structures	Manual	Manual
1681		749.34		G71522YD		PGC-specific RT patterns		UniCarb-DB	Homo sapiens and Sus scrofa	N/A	N/A		m/z 0.35	m/z 0.5	Manual	Manual	Manual	Manual	Precursor mass, retention time order, best possible MS2 match for possible structures	Manual	Manual
1714		1213.04		Ambiguous		PGC-specific RT patterns		UniCarb-DB	Homo sapiens and Sus scrofa	N/A	N/A		m/z 0.35	m/z 0.5	Manual	Manual	Manual	Manual	Precursor mass, retention time order, best possible MS2 match for possible structures	Manual	Manual
1695		820.36		G87598ZK		PGC-specific RT patterns		UniCarb-DB	Homo sapiens and Sus scrofa	N/A	N/A		m/z 0.35	m/z 0.5	Manual	Manual	Manual	Manual	Precursor mass, retention time order, best possible MS2 match for possible structures	Manual	Manual
1283		952.43		G36936UT		PGC-specific RT patterns		UniCarb-DB	Homo sapiens and Sus scrofa	N/A	N/A		m/z 0.35	m/z 0.5	Manual	Manual	Manual	Manual	Precursor mass, retention time order, best possible MS2 match for possible structures	Manual	Manual
1707		1067.49		Ambiguous		PGC-specific RT patterns		UniCarb-DB	Homo sapiens and Sus scrofa	N/A	N/A		m/z 0.35	m/z 0.5	Manual	Manual	Manual	Manual	Precursor mass, retention time order, best possible MS2 match for possible structures	Manual	Manual
1301		911.39		Ambiguous		PGC-specific RT patterns		UniCarb-DB	Homo sapiens and Sus scrofa	N/A	N/A		m/z 0.35	m/z 0.5	Manual	Manual	Manual	Manual	Precursor mass, retention time order, best possible MS2 match for possible structures	Manual	Manual
1722		921.91		G28183PJ		PGC-specific RT patterns		UniCarb-DB	Homo sapiens and Sus scrofa	N/A	N/A		m/z 0.35	m/z 0.5	Manual	Manual	Manual	Manual	Precursor mass, retention time order, best possible MS2 match for possible structures	Manual	Manual
1756		892.9		Ambiguous		PGC-specific RT patterns		UniCarb-DB	Homo sapiens and Sus scrofa	N/A	N/A		m/z 0.35	m/z 0.5	Manual	Manual	Manual	Manual	Precursor mass, retention time order, best possible MS2 match for possible structures	Manual	Manual
1767		884.88		Ambiguous		PGC-specific RT patterns		UniCarb-DB	Homo sapiens and Sus scrofa	N/A	N/A		m/z 0.35	m/z 0.5	Manual	Manual	Manual	Manual	Precursor mass, retention time order, best possible MS2 match for possible structures	Manual	Manual
1768		1073.46		Ambiguous		PGC-specific RT patterns		UniCarb-DB	Homo sapiens and Sus scrofa	N/A	N/A		m/z 0.35	m/z 0.5	Manual	Manual	Manual	Manual	Precursor mass, retention time order, best possible MS2 match for possible structures	Manual	Manual
1337		1114.52		Ambiguous		PGC-specific RT patterns		UniCarb-DB	Homo sapiens and Sus scrofa	N/A	N/A		m/z 0.35	m/z 0.5	Manual	Manual	Manual	Manual	Precursor mass, retention time order, best possible MS2 match for possible structures	Manual	Manual
1800		779.34		Ambiguous		PGC-specific RT patterns		UniCarb-DB	Homo sapiens and Sus scrofa	N/A	N/A		m/z 0.35	m/z 0.5	Manual	Manual	Manual	Manual	Precursor mass, retention time order, best possible MS2 match for possible structures	Manual	Manual
1822		860.4		Ambiguous		PGC-specific RT patterns		UniCarb-DB	Homo sapiens and Sus scrofa	N/A	N/A		m/z 0.35	m/z 0.5	Manual	Manual	Manual	Manual	Precursor mass, retention time order, best possible MS2 match for possible structures	Manual	Manual
1621		731.32		G18043EY		PGC-specific RT patterns		UniCarb-DB	Homo sapiens and Sus scrofa	N/A	N/A		m/z 0.35	m/z 0.5	Manual	Manual	Manual	Manual	Precursor mass, retention time order, best possible MS2 match for possible structures	Manual	Manual
1715		895.42		G84448IT		PGC-specific RT patterns		UniCarb-DB	Homo sapiens and Sus scrofa	N/A	N/A		m/z 0.35	m/z 0.5	Manual	Manual	Manual	Manual	Precursor mass, retention time order, best possible MS2 match for possible structures	Manual	Manual
1813		779.34		Ambiguous		PGC-specific RT patterns		UniCarb-DB	Homo sapiens and Sus scrofa	N/A	N/A		m/z 0.35	m/z 0.5	Manual	Manual	Manual	Manual	Precursor mass, retention time order, best possible MS2 match for possible structures	Manual	Manual
1779		832.89		G27196XM		PGC-specific RT patterns		UniCarb-DB	Homo sapiens and Sus scrofa	N/A	N/A		m/z 0.35	m/z 0.5	Manual	Manual	Manual	Manual	Precursor mass, retention time order, best possible MS2 match for possible structures	Manual	Manual
1804		1317.59		Ambiguous		PGC-specific RT patterns		UniCarb-DB	Homo sapiens and Sus scrofa	N/A	N/A		m/z 0.35	m/z 0.5	Manual	Manual	Manual	Manual	Precursor mass, retention time order, best possible MS2 match for possible structures	Manual	Manual
1831		1397.65		G19949UL		PGC-specific RT patterns		UniCarb-DB	Homo sapiens and Sus scrofa	N/A	N/A		m/z 0.35	m/z 0.5	Manual	Manual	Manual	Manual	Precursor mass, retention time order, best possible MS2 match for possible structures	Manual	Manual
1846		860.4		G91089ZR		PGC-specific RT patterns		UniCarb-DB	Homo sapiens and Sus scrofa	N/A	N/A		m/z 0.35	m/z 0.5	Manual	Manual	Manual	Manual	Precursor mass, retention time order, best possible MS2 match for possible structures	Manual	Manual
1795		731.32		G26403JU		PGC-specific RT patterns		UniCarb-DB	Homo sapiens and Sus scrofa	N/A	N/A		m/z 0.35	m/z 0.5	Manual	Manual	Manual	Manual	Precursor mass, retention time order, best possible MS2 match for possible structures	Manual	Manual
1843		941.44		G66257KQ		PGC-specific RT patterns		UniCarb-DB	Homo sapiens and Sus scrofa	N/A	N/A		m/z 0.35	m/z 0.5	Manual	Manual	Manual	Manual	Precursor mass, retention time order, best possible MS2 match for possible structures	Manual	Manual
1854		739.35		G23025EY		PGC-specific RT patterns		UniCarb-DB	Homo sapiens and Sus scrofa	N/A	N/A		m/z 0.35	m/z 0.5	Manual	Manual	Manual	Manual	Precursor mass, retention time order, best possible MS2 match for possible structures	Manual	Manual
1866		864.37		Ambiguous		PGC-specific RT patterns		UniCarb-DB	Homo sapiens and Sus scrofa	N/A	N/A		m/z 0.35	m/z 0.5	Manual	Manual	Manual	Manual	Precursor mass, retention time order, best possible MS2 match for possible structures	Manual	Manual
1858		779.34		Ambiguous		PGC-specific RT patterns		UniCarb-DB	Homo sapiens and Sus scrofa	N/A	N/A		m/z 0.35	m/z 0.5	Manual	Manual	Manual	Manual	Precursor mass, retention time order, best possible MS2 match for possible structures	Manual	Manual
1841		840.86		G96832KC		PGC-specific RT patterns		UniCarb-DB	Homo sapiens and Sus scrofa	N/A	N/A		m/z 0.35	m/z 0.5	Manual	Manual	Manual	Manual	Precursor mass, retention time order, best possible MS2 match for possible structures	Manual	Manual
1806		1059.47		Ambiguous		PGC-specific RT patterns		UniCarb-DB	Homo sapiens and Sus scrofa	N/A	N/A		m/z 0.35	m/z 0.5	Manual	Manual	Manual	Manual	Precursor mass, retention time order, best possible MS2 match for possible structures	Manual	Manual
1851		1317.59		Ambiguous		PGC-specific RT patterns		UniCarb-DB	Homo sapiens and Sus scrofa	N/A	N/A		m/z 0.35	m/z 0.5	Manual	Manual	Manual	Manual	Precursor mass, retention time order, best possible MS2 match for possible structures	Manual	Manual
1885		1073.46		Ambiguous		PGC-specific RT patterns		UniCarb-DB	Homo sapiens and Sus scrofa	N/A	N/A		m/z 0.35	m/z 0.5	Manual	Manual	Manual	Manual	Precursor mass, retention time order, best possible MS2 match for possible structures	Manual	Manual
1878		860.4		G84170WO		PGC-specific RT patterns		UniCarb-DB	Homo sapiens and Sus scrofa	N/A	N/A		m/z 0.35	m/z 0.5	Manual	Manual	Manual	Manual	Precursor mass, retention time order, best possible MS2 match for possible structures	Manual	Manual
1897		820.36		G52233HF		PGC-specific RT patterns		UniCarb-DB	Homo sapiens and Sus scrofa	N/A	N/A		m/z 0.35	m/z 0.5	Manual	Manual	Manual	Manual	Precursor mass, retention time order, best possible MS2 match for possible structures	Manual	Manual
1879		840.86		Ambiguous		PGC-specific RT patterns		UniCarb-DB	Homo sapiens and Sus scrofa	N/A	N/A		m/z 0.35	m/z 0.5	Manual	Manual	Manual	Manual	Precursor mass, retention time order, best possible MS2 match for possible structures	Manual	Manual
1907		1317.59		Ambiguous		PGC-specific RT patterns		UniCarb-DB	Homo sapiens and Sus scrofa	N/A	N/A		m/z 0.35	m/z 0.5	Manual	Manual	Manual	Manual	Precursor mass, retention time order, best possible MS2 match for possible structures	Manual	Manual
1578		779.34		Ambiguous		PGC-specific RT patterns		UniCarb-DB	Homo sapiens and Sus scrofa	N/A	N/A		m/z 0.35	m/z 0.5	Manual	Manual	Manual	Manual	Precursor mass, retention time order, best possible MS2 match for possible structures	Manual	Manual
1932		783.33		Unspecified		PGC-specific RT patterns		UniCarb-DB	Homo sapiens and Sus scrofa	N/A	N/A		m/z 0.35	m/z 0.5	Manual	Manual	Manual	Manual	Precursor mass, retention time order, best possible MS2 match for possible structures	Manual	Manual
1836		1098.52		G03786GS		PGC-specific RT patterns		UniCarb-DB	Homo sapiens and Sus scrofa	N/A	N/A		m/z 0.35	m/z 0.5	Manual	Manual	Manual	Manual	Precursor mass, retention time order, best possible MS2 match for possible structures	Manual	Manual
1925		1438.66		Ambiguous		PGC-specific RT patterns		UniCarb-DB	Homo sapiens and Sus scrofa	N/A	N/A		m/z 0.35	m/z 0.5	Manual	Manual	Manual	Manual	Precursor mass, retention time order, best possible MS2 match for possible structures	Manual	Manual
1939		965.94		Ambiguous		PGC-specific RT patterns		UniCarb-DB	Homo sapiens and Sus scrofa	N/A	N/A		m/z 0.35	m/z 0.5	Manual	Manual	Manual	Manual	Precursor mass, retention time order, best possible MS2 match for possible structures	Manual	Manual
1846		1059.47		Ambiguous		PGC-specific RT patterns		UniCarb-DB	Homo sapiens and Sus scrofa	N/A	N/A		m/z 0.35	m/z 0.5	Manual	Manual	Manual	Manual	Precursor mass, retention time order, best possible MS2 match for possible structures	Manual	Manual
1897		913.91		Ambiguous		PGC-specific RT patterns		UniCarb-DB	Homo sapiens and Sus scrofa	N/A	N/A		m/z 0.35	m/z 0.5	Manual	Manual	Manual	Manual	Precursor mass, retention time order, best possible MS2 match for possible structures	Manual	Manual
1935		913.91		Ambiguous		PGC-specific RT patterns		UniCarb-DB	Homo sapiens and Sus scrofa	N/A	N/A		m/z 0.35	m/z 0.5	Manual	Manual	Manual	Manual	Precursor mass, retention time order, best possible MS2 match for possible structures	Manual	Manual
1938		1286.07		Ambiguous		PGC-specific RT patterns		UniCarb-DB	Homo sapiens and Sus scrofa	N/A	N/A		m/z 0.35	m/z 0.5	Manual	Manual	Manual	Manual	Precursor mass, retention time order, best possible MS2 match for possible structures	Manual	Manual
1961		799.84		G31603EH		PGC-specific RT patterns		UniCarb-DB	Homo sapiens and Sus scrofa	N/A	N/A		m/z 0.35	m/z 0.5	Manual	Manual	Manual	Manual	Precursor mass, retention time order, best possible MS2 match for possible structures	Manual	Manual
1978		1235.58		Ambiguous		PGC-specific RT patterns		UniCarb-DB	Homo sapiens and Sus scrofa	N/A	N/A		m/z 0.35	m/z 0.5	Manual	Manual	Manual	Manual	Precursor mass, retention time order, best possible MS2 match for possible structures	Manual	Manual
1980		1257.22		Ambiguous		PGC-specific RT patterns		UniCarb-DB	Homo sapiens and Sus scrofa	N/A	N/A		m/z 0.35	m/z 0.5	Manual	Manual	Manual	Manual	Precursor mass, retention time order, best possible MS2 match for possible structures	Manual	Manual
1996		911.39		Ambiguous		PGC-specific RT patterns		UniCarb-DB	Homo sapiens and Sus scrofa	N/A	N/A		m/z 0.35	m/z 0.5	Manual	Manual	Manual	Manual	Precursor mass, retention time order, best possible MS2 match for possible structures	Manual	Manual
1565		1114.52		Ambiguous		PGC-specific RT patterns		UniCarb-DB	Homo sapiens and Sus scrofa	N/A	N/A		m/z 0.35	m/z 0.5	Manual	Manual	Manual	Manual	Precursor mass, retention time order, best possible MS2 match for possible structures	Manual	Manual
1998		1276.56		Ambiguous		PGC-specific RT patterns		UniCarb-DB	Homo sapiens and Sus scrofa	N/A	N/A		m/z 0.35	m/z 0.5	Manual	Manual	Manual	Manual	Precursor mass, retention time order, best possible MS2 match for possible structures	Manual	Manual
1939		1140.53		Ambiguous		PGC-specific RT patterns		UniCarb-DB	Homo sapiens and Sus scrofa	N/A	N/A		m/z 0.35	m/z 0.5	Manual	Manual	Manual	Manual	Precursor mass, retention time order, best possible MS2 match for possible structures	Manual	Manual
1969		812.37		G48422CN		PGC-specific RT patterns		UniCarb-DB	Homo sapiens and Sus scrofa	N/A	N/A		m/z 0.35	m/z 0.5	Manual	Manual	Manual	Manual	Precursor mass, retention time order, best possible MS2 match for possible structures	Manual	Manual
2019		779.34		Ambiguous		PGC-specific RT patterns		UniCarb-DB	Homo sapiens and Sus scrofa	N/A	N/A		m/z 0.35	m/z 0.5	Manual	Manual	Manual	Manual	Precursor mass, retention time order, best possible MS2 match for possible structures	Manual	Manual
2032		945.4		G74784VI		PGC-specific RT patterns		UniCarb-DB	Homo sapiens and Sus scrofa	N/A	N/A		m/z 0.35	m/z 0.5	Manual	Manual	Manual	Manual	Precursor mass, retention time order, best possible MS2 match for possible structures	Manual	Manual
1608		860.4		Ambiguous		PGC-specific RT patterns		UniCarb-DB	Homo sapiens and Sus scrofa	N/A	N/A		m/z 0.35	m/z 0.5	Manual	Manual	Manual	Manual	Precursor mass, retention time order, best possible MS2 match for possible structures	Manual	Manual
2052		1132.04		Ambiguous		PGC-specific RT patterns		UniCarb-DB	Homo sapiens and Sus scrofa	N/A	N/A		m/z 0.35	m/z 0.5	Manual	Manual	Manual	Manual	Precursor mass, retention time order, best possible MS2 match for possible structures	Manual	Manual
1987		1140.53		Ambiguous		PGC-specific RT patterns		UniCarb-DB	Homo sapiens and Sus scrofa	N/A	N/A		m/z 0.35	m/z 0.5	Manual	Manual	Manual	Manual	Precursor mass, retention time order, best possible MS2 match for possible structures	Manual	Manual
2056		884.88		Ambiguous		PGC-specific RT patterns		UniCarb-DB	Homo sapiens and Sus scrofa	N/A	N/A		m/z 0.35	m/z 0.5	Manual	Manual	Manual	Manual	Precursor mass, retention time order, best possible MS2 match for possible structures	Manual	Manual
2050		820.36		Ambiguous		PGC-specific RT patterns		UniCarb-DB	Homo sapiens and Sus scrofa	N/A	N/A		m/z 0.35	m/z 0.5	Manual	Manual	Manual	Manual	Precursor mass, retention time order, best possible MS2 match for possible structures	Manual	Manual
2059		739.35		Ambiguous		PGC-specific RT patterns		UniCarb-DB	Homo sapiens and Sus scrofa	N/A	N/A		m/z 0.35	m/z 0.5	Manual	Manual	Manual	Manual	Precursor mass, retention time order, best possible MS2 match for possible structures	Manual	Manual
2080		1026.46		Ambiguous		PGC-specific RT patterns		UniCarb-DB	Homo sapiens and Sus scrofa	N/A	N/A		m/z 0.35	m/z 0.5	Manual	Manual	Manual	Manual	Precursor mass, retention time order, best possible MS2 match for possible structures	Manual	Manual
2075		759.86		Ambiguous		PGC-specific RT patterns		UniCarb-DB	Homo sapiens and Sus scrofa	N/A	N/A		m/z 0.35	m/z 0.5	Manual	Manual	Manual	Manual	Precursor mass, retention time order, best possible MS2 match for possible structures	Manual	Manual
2082		1119.58		Ambiguous		PGC-specific RT patterns		UniCarb-DB	Homo sapiens and Sus scrofa	N/A	N/A		m/z 0.35	m/z 0.5	Manual	Manual	Manual	Manual	Precursor mass, retention time order, best possible MS2 match for possible structures	Manual	Manual
2003		832.89		G27196XM		PGC-specific RT patterns		UniCarb-DB	Homo sapiens and Sus scrofa	N/A	N/A		m/z 0.35	m/z 0.5	Manual	Manual	Manual	Manual	Precursor mass, retention time order, best possible MS2 match for possible structures	Manual	Manual
2091		986.44		Ambiguous		PGC-specific RT patterns		UniCarb-DB	Homo sapiens and Sus scrofa	N/A	N/A		m/z 0.35	m/z 0.5	Manual	Manual	Manual	Manual	Precursor mass, retention time order, best possible MS2 match for possible structures	Manual	Manual
2101		901.35		Ambiguous		PGC-specific RT patterns		UniCarb-DB	Homo sapiens and Sus scrofa	N/A	N/A		m/z 0.35	m/z 0.5	Manual	Manual	Manual	Manual	Precursor mass, retention time order, best possible MS2 match for possible structures	Manual	Manual
2081		921.91		G84440YT		PGC-specific RT patterns		UniCarb-DB	Homo sapiens and Sus scrofa	N/A	N/A		m/z 0.35	m/z 0.5	Manual	Manual	Manual	Manual	Precursor mass, retention time order, best possible MS2 match for possible structures	Manual	Manual
2111		759.86		Ambiguous		PGC-specific RT patterns		UniCarb-DB	Homo sapiens and Sus scrofa	N/A	N/A		m/z 0.35	m/z 0.5	Manual	Manual	Manual	Manual	Precursor mass, retention time order, best possible MS2 match for possible structures	Manual	Manual
2118		1111.5		G18290SV		PGC-specific RT patterns		UniCarb-DB	Homo sapiens and Sus scrofa	N/A	N/A		m/z 0.35	m/z 0.5	Manual	Manual	Manual	Manual	Precursor mass, retention time order, best possible MS2 match for possible structures	Manual	Manual
2039		966.42		G45866FA		PGC-specific RT patterns		UniCarb-DB	Homo sapiens and Sus scrofa	N/A	N/A		m/z 0.35	m/z 0.5	Manual	Manual	Manual	Manual	Precursor mass, retention time order, best possible MS2 match for possible structures	Manual	Manual
2041		1260.61		Ambiguous		PGC-specific RT patterns		UniCarb-DB	Homo sapiens and Sus scrofa	N/A	N/A		m/z 0.35	m/z 0.5	Manual	Manual	Manual	Manual	Precursor mass, retention time order, best possible MS2 match for possible structures	Manual	Manual
2063		994.95		Ambiguous		PGC-specific RT patterns		UniCarb-DB	Homo sapiens and Sus scrofa	N/A	N/A		m/z 0.35	m/z 0.5	Manual	Manual	Manual	Manual	Precursor mass, retention time order, best possible MS2 match for possible structures	Manual	Manual
2098		957.94		Ambiguous		PGC-specific RT patterns		UniCarb-DB	Homo sapiens and Sus scrofa	N/A	N/A		m/z 0.35	m/z 0.5	Manual	Manual	Manual	Manual	Precursor mass, retention time order, best possible MS2 match for possible structures	Manual	Manual
2105		1057.51		G77712UR		PGC-specific RT patterns		UniCarb-DB	Homo sapiens and Sus scrofa	N/A	N/A		m/z 0.35	m/z 0.5	Manual	Manual	Manual	Manual	Precursor mass, retention time order, best possible MS2 match for possible structures	Manual	Manual
2140		799.84		G31603EH		PGC-specific RT patterns		UniCarb-DB	Homo sapiens and Sus scrofa	N/A	N/A		m/z 0.35	m/z 0.5	Manual	Manual	Manual	Manual	Precursor mass, retention time order, best possible MS2 match for possible structures	Manual	Manual
2160		739.35		G23025EY		PGC-specific RT patterns		UniCarb-DB	Homo sapiens and Sus scrofa	N/A	N/A		m/z 0.35	m/z 0.5	Manual	Manual	Manual	Manual	Precursor mass, retention time order, best possible MS2 match for possible structures	Manual	Manual
2142		966.04		Ambiguous		PGC-specific RT patterns		UniCarb-DB	Homo sapiens and Sus scrofa	N/A	N/A	m/z 0.35	m/z 0.5	Manual	Manual	Manual	Manual	Precursor mass, retention time order, best possible MS2 match for possible structures	Manual	Manual
2170		1235.58		Ambiguous		PGC-specific RT patterns		UniCarb-DB	Homo sapiens and Sus scrofa	N/A	N/A	m/z 0.35	m/z 0.5	Manual	Manual	Manual	Manual	Precursor mass, retention time order, best possible MS2 match for possible structures	Manual	Manual
2167		1073.46		Ambiguous		PGC-specific RT patterns		UniCarb-DB	Homo sapiens and Sus scrofa	N/A	N/A	m/z 0.35	m/z 0.5	Manual	Manual	Manual	Manual	Precursor mass, retention time order, best possible MS2 match for possible structures	Manual	Manual
2194		965.94		G70119NP		PGC-specific RT patterns		UniCarb-DB	Homo sapiens and Sus scrofa	N/A	N/A	m/z 0.35	m/z 0.5	Manual	Manual	Manual	Manual	Precursor mass, retention time order, best possible MS2 match for possible structures	Manual	Manual
2213		986.44		Ambiguous		PGC-specific RT patterns		UniCarb-DB	Homo sapiens and Sus scrofa	N/A	N/A	m/z 0.35	m/z 0.5	Manual	Manual	Manual	Manual	Precursor mass, retention time order, best possible MS2 match for possible structures	Manual	Manual
2129		1038.95		Ambiguous		PGC-specific RT patterns		UniCarb-DB	Homo sapiens and Sus scrofa	N/A	N/A	m/z 0.35	m/z 0.5	Manual	Manual	Manual	Manual	Precursor mass, retention time order, best possible MS2 match for possible structures	Manual	Manual
2185		739.35		Ambiguous		PGC-specific RT patterns		UniCarb-DB	Homo sapiens and Sus scrofa	N/A	N/A	m/z 0.35	m/z 0.5	Manual	Manual	Manual	Manual	Precursor mass, retention time order, best possible MS2 match for possible structures	Manual	Manual
2223		840.86		G96832KC		PGC-specific RT patterns		UniCarb-DB	Homo sapiens and Sus scrofa	N/A	N/A	m/z 0.35	m/z 0.5	Manual	Manual	Manual	Manual	Precursor mass, retention time order, best possible MS2 match for possible structures	Manual	Manual
2206		1114.52		Ambiguous		PGC-specific RT patterns		UniCarb-DB	Homo sapiens and Sus scrofa	N/A	N/A	m/z 0.35	m/z 0.5	Manual	Manual	Manual	Manual	Precursor mass, retention time order, best possible MS2 match for possible structures	Manual	Manual
2146		1260.54		Ambiguous		PGC-specific RT patterns		UniCarb-DB	Homo sapiens and Sus scrofa	N/A	N/A	m/z 0.35	m/z 0.5	Manual	Manual	Manual	Manual	Precursor mass, retention time order, best possible MS2 match for possible structures	Manual	Manual
2154		893.39		Ambiguous		PGC-specific RT patterns		UniCarb-DB	Homo sapiens and Sus scrofa	N/A	N/A	m/z 0.35	m/z 0.5	Manual	Manual	Manual	Manual	Precursor mass, retention time order, best possible MS2 match for possible structures	Manual	Manual
2231		1002.95		Ambiguous		PGC-specific RT patterns		UniCarb-DB	Homo sapiens and Sus scrofa	N/A	N/A	m/z 0.35	m/z 0.5	Manual	Manual	Manual	Manual	Precursor mass, retention time order, best possible MS2 match for possible structures	Manual	Manual
2253		861.4		Ambiguous		PGC-specific RT patterns		UniCarb-DB	Homo sapiens and Sus scrofa	N/A	N/A	m/z 0.35	m/z 0.5	Manual	Manual	Manual	Manual	Precursor mass, retention time order, best possible MS2 match for possible structures	Manual	Manual
2213		731.32		G84053BQ		PGC-specific RT patterns		UniCarb-DB	Homo sapiens and Sus scrofa	N/A	N/A	m/z 0.35	m/z 0.5	Manual	Manual	Manual	Manual	Precursor mass, retention time order, best possible MS2 match for possible structures	Manual	Manual
2242		957.94		Ambiguous		PGC-specific RT patterns		UniCarb-DB	Homo sapiens and Sus scrofa	N/A	N/A	m/z 0.35	m/z 0.5	Manual	Manual	Manual	Manual	Precursor mass, retention time order, best possible MS2 match for possible structures	Manual	Manual
2242		812.36		G57435DB		PGC-specific RT patterns		UniCarb-DB	Homo sapiens and Sus scrofa	N/A	N/A	m/z 0.35	m/z 0.5	Manual	Manual	Manual	Manual	Precursor mass, retention time order, best possible MS2 match for possible structures	Manual	Manual
2268		1235.58		Ambiguous		PGC-specific RT patterns		UniCarb-DB	Homo sapiens and Sus scrofa	N/A	N/A	m/z 0.35	m/z 0.5	Manual	Manual	Manual	Manual	Precursor mass, retention time order, best possible MS2 match for possible structures	Manual	Manual
2277		1397.65		Ambiguous		PGC-specific RT patterns		UniCarb-DB	Homo sapiens and Sus scrofa	N/A	N/A	m/z 0.35	m/z 0.5	Manual	Manual	Manual	Manual	Precursor mass, retention time order, best possible MS2 match for possible structures	Manual	Manual
2247		893.39		Ambiguous		PGC-specific RT patterns		UniCarb-DB	Homo sapiens and Sus scrofa	N/A	N/A	m/z 0.35	m/z 0.5	Manual	Manual	Manual	Manual	Precursor mass, retention time order, best possible MS2 match for possible structures	Manual	Manual
2314		799.84		Ambiguous		PGC-specific RT patterns		UniCarb-DB	Homo sapiens and Sus scrofa	N/A	N/A	m/z 0.35	m/z 0.5	Manual	Manual	Manual	Manual	Precursor mass, retention time order, best possible MS2 match for possible structures	Manual	Manual
2257		1153.62		Ambiguous		PGC-specific RT patterns		UniCarb-DB	Homo sapiens and Sus scrofa	N/A	N/A	m/z 0.35	m/z 0.5	Manual	Manual	Manual	Manual	Precursor mass, retention time order, best possible MS2 match for possible structures	Manual	Manual
2313		820.36		G59917BF		PGC-specific RT patterns		UniCarb-DB	Homo sapiens and Sus scrofa	N/A	N/A	m/z 0.35	m/z 0.5	Manual	Manual	Manual	Manual	Precursor mass, retention time order, best possible MS2 match for possible structures	Manual	Manual
2268		856.4		G23031BI		PGC-specific RT patterns		UniCarb-DB	Homo sapiens and Sus scrofa	N/A	N/A	m/z 0.35	m/z 0.5	Manual	Manual	Manual	Manual	Precursor mass, retention time order, best possible MS2 match for possible structures	Manual	Manual
2349		840.86		Ambiguous		PGC-specific RT patterns		UniCarb-DB	Homo sapiens and Sus scrofa	N/A	N/A	m/z 0.35	m/z 0.5	Manual	Manual	Manual	Manual	Precursor mass, retention time order, best possible MS2 match for possible structures	Manual	Manual
2358		1067.49		Ambiguous		PGC-specific RT patterns		UniCarb-DB	Homo sapiens and Sus scrofa	N/A	N/A	m/z 0.35	m/z 0.5	Manual	Manual	Manual	Manual	Precursor mass, retention time order, best possible MS2 match for possible structures	Manual	Manual
2288		1439.27		Ambiguous		PGC-specific RT patterns		UniCarb-DB	Homo sapiens and Sus scrofa	N/A	N/A	m/z 0.35	m/z 0.5	Manual	Manual	Manual	Manual	Precursor mass, retention time order, best possible MS2 match for possible structures	Manual	Manual
1943		783.33		Ambiguous		PGC-specific RT patterns		UniCarb-DB	Homo sapiens and Sus scrofa	N/A	N/A	m/z 0.35	m/z 0.5	Manual	Manual	Manual	Manual	Precursor mass, retention time order, best possible MS2 match for possible structures	Manual	Manual
2299		856.36		Ambiguous		PGC-specific RT patterns		UniCarb-DB	Homo sapiens and Sus scrofa	N/A	N/A	m/z 0.35	m/z 0.5	Manual	Manual	Manual	Manual	Precursor mass, retention time order, best possible MS2 match for possible structures	Manual	Manual
2425		1056.61		Ambiguous		PGC-specific RT patterns		UniCarb-DB	Homo sapiens and Sus scrofa	N/A	N/A	m/z 0.35	m/z 0.5	Manual	Manual	Manual	Manual	Precursor mass, retention time order, best possible MS2 match for possible structures	Manual	Manual
2394		820.36		Ambiguous		PGC-specific RT patterns		UniCarb-DB	Homo sapiens and Sus scrofa	N/A	N/A	m/z 0.35	m/z 0.5	Manual	Manual	Manual	Manual	Precursor mass, retention time order, best possible MS2 match for possible structures	Manual	Manual
2411		1087.99		Ambiguous		PGC-specific RT patterns		UniCarb-DB	Homo sapiens and Sus scrofa	N/A	N/A	m/z 0.35	m/z 0.5	Manual	Manual	Manual	Manual	Precursor mass, retention time order, best possible MS2 match for possible structures	Manual	Manual
2426		1585.42		Ambiguous		PGC-specific RT patterns		UniCarb-DB	Homo sapiens and Sus scrofa	N/A	N/A	m/z 0.35	m/z 0.5	Manual	Manual	Manual	Manual	Precursor mass, retention time order, best possible MS2 match for possible structures	Manual	Manual
2412		1276.56		Ambiguous		PGC-specific RT patterns		UniCarb-DB	Homo sapiens and Sus scrofa	N/A	N/A	m/z 0.35	m/z 0.5	Manual	Manual	Manual	Manual	Precursor mass, retention time order, best possible MS2 match for possible structures	Manual	Manual
2315		1059.47		Ambiguous		PGC-specific RT patterns		UniCarb-DB	Homo sapiens and Sus scrofa	N/A	N/A	m/z 0.35	m/z 0.5	Manual	Manual	Manual	Manual	Precursor mass, retention time order, best possible MS2 match for possible structures	Manual	Manual
2335		731.32		Ambiguous		PGC-specific RT patterns		UniCarb-DB	Homo sapiens and Sus scrofa	N/A	N/A	m/z 0.35	m/z 0.5	Manual	Manual	Manual	Manual	Precursor mass, retention time order, best possible MS2 match for possible structures	Manual	Manual
2404		1059.47		Ambiguous		PGC-specific RT patterns		UniCarb-DB	Homo sapiens and Sus scrofa	N/A	N/A	m/z 0.35	m/z 0.5	Manual	Manual	Manual	Manual	Precursor mass, retention time order, best possible MS2 match for possible structures	Manual	Manual
2379		1276.56		Ambiguous		PGC-specific RT patterns		UniCarb-DB	Homo sapiens and Sus scrofa	N/A	N/A	m/z 0.35	m/z 0.5	Manual	Manual	Manual	Manual	Precursor mass, retention time order, best possible MS2 match for possible structures	Manual	Manual
2406		1184.52		Ambiguous		PGC-specific RT patterns		UniCarb-DB	Homo sapiens and Sus scrofa	N/A	N/A	m/z 0.35	m/z 0.5	Manual	Manual	Manual	Manual	Precursor mass, retention time order, best possible MS2 match for possible structures	Manual	Manual
2346		1294.28		Ambiguous		PGC-specific RT patterns		UniCarb-DB	Homo sapiens and Sus scrofa	N/A	N/A	m/z 0.35	m/z 0.5	Manual	Manual	Manual	Manual	Precursor mass, retention time order, best possible MS2 match for possible structures	Manual	Manual
2451		1046.97		G50799TU		PGC-specific RT patterns		UniCarb-DB	Homo sapiens and Sus scrofa	N/A	N/A	m/z 0.35	m/z 0.5	Manual	Manual	Manual	Manual	Precursor mass, retention time order, best possible MS2 match for possible structures	Manual	Manual
2410		1079.99		G47140BP		PGC-specific RT patterns		UniCarb-DB	Homo sapiens and Sus scrofa	N/A	N/A	m/z 0.35	m/z 0.5	Manual	Manual	Manual	Manual	Precursor mass, retention time order, best possible MS2 match for possible structures	Manual	Manual
2421		820.36		Ambiguous		PGC-specific RT patterns		UniCarb-DB	Homo sapiens and Sus scrofa	N/A	N/A	m/z 0.35	m/z 0.5	Manual	Manual	Manual	Manual	Precursor mass, retention time order, best possible MS2 match for possible structures	Manual	Manual
2428		1038.95		G26204QU		PGC-specific RT patterns		UniCarb-DB	Homo sapiens and Sus scrofa	N/A	N/A	m/z 0.35	m/z 0.5	Manual	Manual	Manual	Manual	Precursor mass, retention time order, best possible MS2 match for possible structures	Manual	Manual
2450		1039.46		G76782BU		PGC-specific RT patterns		UniCarb-DB	Homo sapiens and Sus scrofa	N/A	N/A	m/z 0.35	m/z 0.5	Manual	Manual	Manual	Manual	Precursor mass, retention time order, best possible MS2 match for possible structures	Manual	Manual
2451		1112.01		Ambiguous		PGC-specific RT patterns		UniCarb-DB	Homo sapiens and Sus scrofa	N/A	N/A	m/z 0.35	m/z 0.5	Manual	Manual	Manual	Manual	Precursor mass, retention time order, best possible MS2 match for possible structures	Manual	Manual
2477		812.36		Ambiguous		PGC-specific RT patterns		UniCarb-DB	Homo sapiens and Sus scrofa	N/A	N/A	m/z 0.35	m/z 0.5	Manual	Manual	Manual	Manual	Precursor mass, retention time order, best possible MS2 match for possible structures	Manual	Manual
2490		986.93		Ambiguous		PGC-specific RT patterns		UniCarb-DB	Homo sapiens and Sus scrofa	N/A	N/A	m/z 0.35	m/z 0.5	Manual	Manual	Manual	Manual	Precursor mass, retention time order, best possible MS2 match for possible structures	Manual	Manual
2509		880.87		Ambiguous		PGC-specific RT patterns		UniCarb-DB	Homo sapiens and Sus scrofa	N/A	N/A	m/z 0.35	m/z 0.5	Manual	Manual	Manual	Manual	Precursor mass, retention time order, best possible MS2 match for possible structures	Manual	Manual
2087		1148.55		Ambiguous		PGC-specific RT patterns		UniCarb-DB	Homo sapiens and Sus scrofa	N/A	N/A	m/z 0.35	m/z 0.5	Manual	Manual	Manual	Manual	Precursor mass, retention time order, best possible MS2 match for possible structures	Manual	Manual
2523		921.91		Ambiguous		PGC-specific RT patterns		UniCarb-DB	Homo sapiens and Sus scrofa	N/A	N/A	m/z 0.35	m/z 0.5	Manual	Manual	Manual	Manual	Precursor mass, retention time order, best possible MS2 match for possible structures	Manual	Manual
2495		1038.95		Ambiguous		PGC-specific RT patterns		UniCarb-DB	Homo sapiens and Sus scrofa	N/A	N/A	m/z 0.35	m/z 0.5	Manual	Manual	Manual	Manual	Precursor mass, retention time order, best possible MS2 match for possible structures	Manual	Manual
2515		986.93		Ambiguous		PGC-specific RT patterns		UniCarb-DB	Homo sapiens and Sus scrofa	N/A	N/A	m/z 0.35	m/z 0.5	Manual	Manual	Manual	Manual	Precursor mass, retention time order, best possible MS2 match for possible structures	Manual	Manual
2544		966.42		Ambiguous		PGC-specific RT patterns		UniCarb-DB	Homo sapiens and Sus scrofa	N/A	N/A	m/z 0.35	m/z 0.5	Manual	Manual	Manual	Manual	Precursor mass, retention time order, best possible MS2 match for possible structures	Manual	Manual
2579		812.37		Ambiguous		PGC-specific RT patterns		UniCarb-DB	Homo sapiens and Sus scrofa	N/A	N/A	m/z 0.35	m/z 0.5	Manual	Manual	Manual	Manual	Precursor mass, retention time order, best possible MS2 match for possible structures	Manual	Manual
2536		1002.95		Ambiguous		PGC-specific RT patterns		UniCarb-DB	Homo sapiens and Sus scrofa	N/A	N/A	m/z 0.35	m/z 0.5	Manual	Manual	Manual	Manual	Precursor mass, retention time order, best possible MS2 match for possible structures	Manual	Manual
2602		913.91		Ambiguous		PGC-specific RT patterns		UniCarb-DB	Homo sapiens and Sus scrofa	N/A	N/A	m/z 0.35	m/z 0.5	Manual	Manual	Manual	Manual	Precursor mass, retention time order, best possible MS2 match for possible structures	Manual	Manual
2353		966.04		Ambiguous		PGC-specific RT patterns		UniCarb-DB	Homo sapiens and Sus scrofa	N/A	N/A	m/z 0.35	m/z 0.5	Manual	Manual	Manual	Manual	Precursor mass, retention time order, best possible MS2 match for possible structures	Manual	Manual
2608		934.42		Ambiguous		PGC-specific RT patterns		UniCarb-DB	Homo sapiens and Sus scrofa	N/A	N/A	m/z 0.35	m/z 0.5	Manual	Manual	Manual	Manual	Precursor mass, retention time order, best possible MS2 match for possible structures	Manual	Manual
2609		1185.06		Ambiguous		PGC-specific RT patterns		UniCarb-DB	Homo sapiens and Sus scrofa	N/A	N/A	m/z 0.35	m/z 0.5	Manual	Manual	Manual	Manual	Precursor mass, retention time order, best possible MS2 match for possible structures	Manual	Manual
2617		1221.54		Ambiguous		PGC-specific RT patterns		UniCarb-DB	Homo sapiens and Sus scrofa	N/A	N/A	m/z 0.35	m/z 0.5	Manual	Manual	Manual	Manual	Precursor mass, retention time order, best possible MS2 match for possible structures	Manual	Manual
2625		901.35		Ambiguous		PGC-specific RT patterns		UniCarb-DB	Homo sapiens and Sus scrofa	N/A	N/A	m/z 0.35	m/z 0.5	Manual	Manual	Manual	Manual	Precursor mass, retention time order, best possible MS2 match for possible structures	Manual	Manual
2617		1038.95		Ambiguous		PGC-specific RT patterns		UniCarb-DB	Homo sapiens and Sus scrofa	N/A	N/A	m/z 0.35	m/z 0.5	Manual	Manual	Manual	Manual	Precursor mass, retention time order, best possible MS2 match for possible structures	Manual	Manual
2384		1294.28		Ambiguous		PGC-specific RT patterns		UniCarb-DB	Homo sapiens and Sus scrofa	N/A	N/A	m/z 0.35	m/z 0.5	Manual	Manual	Manual	Manual	Precursor mass, retention time order, best possible MS2 match for possible structures	Manual	Manual
2628		966.42		Ambiguous		PGC-specific RT patterns		UniCarb-DB	Homo sapiens and Sus scrofa	N/A	N/A	m/z 0.35	m/z 0.5	Manual	Manual	Manual	Manual	Precursor mass, retention time order, best possible MS2 match for possible structures	Manual	Manual
2635		1140.53		Ambiguous		PGC-specific RT patterns		UniCarb-DB	Homo sapiens and Sus scrofa	N/A	N/A	m/z 0.35	m/z 0.5	Manual	Manual	Manual	Manual	Precursor mass, retention time order, best possible MS2 match for possible structures	Manual	Manual
2639		986.93		Ambiguous		PGC-specific RT patterns		UniCarb-DB	Homo sapiens and Sus scrofa	N/A	N/A	m/z 0.35	m/z 0.5	Manual	Manual	Manual	Manual	Precursor mass, retention time order, best possible MS2 match for possible structures	Manual	Manual
2683		1205.53		Ambiguous		PGC-specific RT patterns		UniCarb-DB	Homo sapiens and Sus scrofa	N/A	N/A	m/z 0.35	m/z 0.5	Manual	Manual	Manual	Manual	Precursor mass, retention time order, best possible MS2 match for possible structures	Manual	Manual
2685		893.39		Ambiguous		PGC-specific RT patterns		UniCarb-DB	Homo sapiens and Sus scrofa	N/A	N/A	m/z 0.35	m/z 0.5	Manual	Manual	Manual	Manual	Precursor mass, retention time order, best possible MS2 match for possible structures	Manual	Manual
2468		1439.27		Ambiguous		PGC-specific RT patterns		UniCarb-DB	Homo sapiens and Sus scrofa	N/A	N/A	m/z 0.35	m/z 0.5	Manual	Manual	Manual	Manual	Precursor mass, retention time order, best possible MS2 match for possible structures	Manual	Manual
2728		1260.54		Ambiguous		PGC-specific RT patterns		UniCarb-DB	Homo sapiens and Sus scrofa	N/A	N/A	m/z 0.35	m/z 0.5	Manual	Manual	Manual	Manual	Precursor mass, retention time order, best possible MS2 match for possible structures	Manual	Manual
2697		921.91		Ambiguous		PGC-specific RT patterns		UniCarb-DB	Homo sapiens and Sus scrofa	N/A	N/A	m/z 0.35	m/z 0.5	Manual	Manual	Manual	Manual	Precursor mass, retention time order, best possible MS2 match for possible structures	Manual	Manual
2746		739.35		G21731DB		PGC-specific RT patterns		UniCarb-DB	Homo sapiens and Sus scrofa	N/A	N/A	m/z 0.35	m/z 0.5	Manual	Manual	Manual	Manual	Precursor mass, retention time order, best possible MS2 match for possible structures	Manual	Manual
2700		1002.95		Ambiguous		PGC-specific RT patterns		UniCarb-DB	Homo sapiens and Sus scrofa	N/A	N/A	m/z 0.35	m/z 0.5	Manual	Manual	Manual	Manual	Precursor mass, retention time order, best possible MS2 match for possible structures	Manual	Manual
2435		1067.25		Ambiguous		PGC-specific RT patterns		UniCarb-DB	Homo sapiens and Sus scrofa	N/A	N/A	m/z 0.35	m/z 0.5	Manual	Manual	Manual	Manual	Precursor mass, retention time order, best possible MS2 match for possible structures	Manual	Manual
2734		901.35		Ambiguous		PGC-specific RT patterns		UniCarb-DB	Homo sapiens and Sus scrofa	N/A	N/A	m/z 0.35	m/z 0.5	Manual	Manual	Manual	Manual	Precursor mass, retention time order, best possible MS2 match for possible structures	Manual	Manual
2817		1059.99		Ambiguous		PGC-specific RT patterns		UniCarb-DB	Homo sapiens and Sus scrofa	N/A	N/A	m/z 0.35	m/z 0.5	Manual	Manual	Manual	Manual	Precursor mass, retention time order, best possible MS2 match for possible structures	Manual	Manual
2413		1294.28		Ambiguous		PGC-specific RT patterns		UniCarb-DB	Homo sapiens and Sus scrofa	N/A	N/A	m/z 0.35	m/z 0.5	Manual	Manual	Manual	Manual	Precursor mass, retention time order, best possible MS2 match for possible structures	Manual	Manual
2507		1111.6		G18290SV		PGC-specific RT patterns		UniCarb-DB	Homo sapiens and Sus scrofa	N/A	N/A	m/z 0.35	m/z 0.5	Manual	Manual	Manual	Manual	Precursor mass, retention time order, best possible MS2 match for possible structures	Manual	Manual
2483		1439.27		Ambiguous		PGC-specific RT patterns		UniCarb-DB	Homo sapiens and Sus scrofa	N/A	N/A	m/z 0.35	m/z 0.5	Manual	Manual	Manual	Manual	Precursor mass, retention time order, best possible MS2 match for possible structures	Manual	Manual
2820		1059.99		Ambiguous		PGC-specific RT patterns		UniCarb-DB	Homo sapiens and Sus scrofa	N/A	N/A	m/z 0.35	m/z 0.5	Manual	Manual	Manual	Manual	Precursor mass, retention time order, best possible MS2 match for possible structures	Manual	Manual
2836		1002.95		Ambiguous		PGC-specific RT patterns		UniCarb-DB	Homo sapiens and Sus scrofa	N/A	N/A	m/z 0.35	m/z 0.5	Manual	Manual	Manual	Manual	Precursor mass, retention time order, best possible MS2 match for possible structures	Manual	Manual
2898		1059.99		Ambiguous		PGC-specific RT patterns		UniCarb-DB	Homo sapiens and Sus scrofa	N/A	N/A	m/z 0.35	m/z 0.5	Manual	Manual	Manual	Manual	Precursor mass, retention time order, best possible MS2 match for possible structures	Manual	Manual
2897		982.38		G63909HB		PGC-specific RT patterns		UniCarb-DB	Homo sapiens and Sus scrofa	N/A	N/A	m/z 0.35	m/z 0.5	Manual	Manual	Manual	Manual	Precursor mass, retention time order, best possible MS2 match for possible structures	Manual	Manual
2909		1221.54		Ambiguous		PGC-specific RT patterns		UniCarb-DB	Homo sapiens and Sus scrofa	N/A	N/A	m/z 0.35	m/z 0.5	Manual	Manual	Manual	Manual	Precursor mass, retention time order, best possible MS2 match for possible structures	Manual	Manual
2955		1002.95		Ambiguous		PGC-specific RT patterns		UniCarb-DB	Homo sapiens and Sus scrofa	N/A	N/A	m/z 0.35	m/z 0.5	Manual	Manual	Manual	Manual	Precursor mass, retention time order, best possible MS2 match for possible structures	Manual	Manual
2629		1439.27		Ambiguous		PGC-specific RT patterns		UniCarb-DB	Homo sapiens and Sus scrofa	N/A	N/A	m/z 0.35	m/z 0.5	Manual	Manual	Manual	Manual	Precursor mass, retention time order, best possible MS2 match for possible structures	Manual	Manual
3015		1002.95		Ambiguous		PGC-specific RT patterns		UniCarb-DB	Homo sapiens and Sus scrofa	N/A	N/A	m/z 0.35	m/z 0.5	Manual	Manual	Manual	Manual	Precursor mass, retention time order, best possible MS2 match for possible structures	Manual	Manual
2719		1294.28		Ambiguous		PGC-specific RT patterns		UniCarb-DB	Homo sapiens and Sus scrofa	N/A	N/A	m/z 0.35	m/z 0.5	Manual	Manual	Manual	Manual	Precursor mass, retention time order, best possible MS2 match for possible structures	Manual	Manual
2428		1381.78		G97353GO		PGC-specific RT patterns		UniCarb-DB	Homo sapiens and Sus scrofa	N/A	N/A	m/z 0.35	m/z 0.5	Manual	Manual	Manual	Manual	Precursor mass, retention time order, best possible MS2 match for possible structures	Manual	Manual
2416		937.46		G51461ZF		PGC-specific RT patterns		UniCarb-DB	Homo sapiens and Sus scrofa	N/A	N/A	m/z 0.35	m/z 0.5	Manual	Manual	Manual	Manual	Precursor mass, retention time order, best possible MS2 match for possible structures	Manual	Manual
2221		791.89		G38702RY		PGC-specific RT patterns		UniCarb-DB	Homo sapiens and Sus scrofa	N/A	N/A	m/z 0.35	m/z 0.5	Manual	Manual	Manual	Manual	Precursor mass, retention time order, best possible MS2 match for possible structures	Manual	Manual
2232		864.4		G21754WR		PGC-specific RT patterns		UniCarb-DB	Homo sapiens and Sus scrofa	N/A	N/A	m/z 0.35	m/z 0.5	Manual	Manual	Manual	Manual	Precursor mass, retention time order, best possible MS2 match for possible structures	Manual	Manual
2488		1018.51		G79057YU		PGC-specific RT patterns		UniCarb-DB	Homo sapiens and Sus scrofa	N/A	N/A	m/z 0.35	m/z 0.5	Manual	Manual	Manual	Manual	Precursor mass, retention time order, best possible MS2 match for possible structures	Manual	Manual
2337		872.92		G03605BS		PGC-specific RT patterns		UniCarb-DB	Homo sapiens and Sus scrofa	N/A	N/A	m/z 0.35	m/z 0.5	Manual	Manual	Manual	Manual	Precursor mass, retention time order, best possible MS2 match for possible structures	Manual	Manual
2313		945.46		G65666SB		PGC-specific RT patterns		UniCarb-DB	Homo sapiens and Sus scrofa	N/A	N/A	m/z 0.35	m/z 0.5	Manual	Manual	Manual	Manual	Precursor mass, retention time order, best possible MS2 match for possible structures	Manual	Manual
2550		1047.56		Ambiguous		PGC-specific RT patterns		UniCarb-DB	Homo sapiens and Sus scrofa	N/A	N/A	m/z 0.35	m/z 0.5	Manual	Manual	Manual	Manual	Precursor mass, retention time order, best possible MS2 match for possible structures	Manual	Manual
2287		1219.64		G75641KQ		PGC-specific RT patterns		UniCarb-DB	Homo sapiens and Sus scrofa	N/A	N/A	m/z 0.35	m/z 0.5	Manual	Manual	Manual	Manual	Precursor mass, retention time order, best possible MS2 match for possible structures	Manual	Manual
2644		1221.63		Ambiguous		PGC-specific RT patterns		UniCarb-DB	Homo sapiens and Sus scrofa	N/A	N/A	m/z 0.35	m/z 0.5	Manual	Manual	Manual	Manual	Precursor mass, retention time order, best possible MS2 match for possible structures	Manual	Manual
2668		1221.63		Ambiguous		PGC-specific RT patterns		UniCarb-DB	Homo sapiens and Sus scrofa	N/A	N/A	m/z 0.35	m/z 0.5	Manual	Manual	Manual	Manual	Precursor mass, retention time order, best possible MS2 match for possible structures	Manual	Manual
2885		1221.63		Ambiguous		PGC-specific RT patterns		UniCarb-DB	Homo sapiens and Sus scrofa	N/A	N/A	m/z 0.35	m/z 0.5	Manual	Manual	Manual	Manual	Precursor mass, retention time order, best possible MS2 match for possible structures	Manual	Manual
2937		1221.63		Ambiguous		PGC-specific RT patterns		UniCarb-DB	Homo sapiens and Sus scrofa	N/A	N/A	m/z 0.35	m/z 0.5	Manual	Manual	Manual	Manual	Precursor mass, retention time order, best possible MS2 match for possible structures	Manual	Manual
2710		1008.18		Ambiguous		PGC-specific RT patterns		UniCarb-DB	Homo sapiens and Sus scrofa	N/A	N/A		m/z 0.35	m/z 0.5	Manual	Manual	Manual	Manual	Precursor mass, retention time order, best possible MS2 match for possible structures	Manual
2752		1008.18		Ambiguous		PGC-specific RT patterns		UniCarb-DB	Homo sapiens and Sus scrofa	N/A	N/A		m/z 0.35	m/z 0.5	Manual	Manual	Manual	Manual	Precursor mass, retention time order, best possible MS2 match for possible structures	Manual
2542		1076.09		Ambiguous		PGC-specific RT patterns		UniCarb-DB	Homo sapiens and Sus scrofa	N/A	N/A		m/z 0.35	m/z 0.5	Manual	Manual	Manual	Manual	Precursor mass, retention time order, best possible MS2 match for possible structures	Manual
2645		1076.09		Ambiguous		PGC-specific RT patterns		UniCarb-DB	Homo sapiens and Sus scrofa	N/A	N/A		m/z 0.35	m/z 0.5	Manual	Manual	Manual	Manual	Precursor mass, retention time order, best possible MS2 match for possible structures	Manual
2819		1076.09		Ambiguous		PGC-specific RT patterns		UniCarb-DB	Homo sapiens and Sus scrofa	N/A	N/A		m/z 0.35	m/z 0.5	Manual	Manual	Manual	Manual	Precursor mass, retention time order, best possible MS2 match for possible structures	Manual
2296		1056.56		Ambiguous		PGC-specific RT patterns		UniCarb-DB	Homo sapiens and Sus scrofa	N/A	N/A		m/z 0.35	m/z 0.5	Manual	Manual	Manual	Manual	Precursor mass, retention time order, best possible MS2 match for possible structures	Manual
2517		1056.56		Ambiguous		PGC-specific RT patterns		UniCarb-DB	Homo sapiens and Sus scrofa	N/A	N/A		m/z 0.35	m/z 0.5	Manual	Manual	Manual	Manual	Precursor mass, retention time order, best possible MS2 match for possible structures	Manual
2701		1521.3		Ambiguous		PGC-specific RT patterns		UniCarb-DB	Homo sapiens and Sus scrofa	N/A	N/A		m/z 0.35	m/z 0.5	Manual	Manual	Manual	Manual	Precursor mass, retention time order, best possible MS2 match for possible structures	Manual
2491		1148.59		Ambiguous		PGC-specific RT patterns		UniCarb-DB	Homo sapiens and Sus scrofa	N/A	N/A		m/z 0.35	m/z 0.5	Manual	Manual	Manual	Manual	Precursor mass, retention time order, best possible MS2 match for possible structures	Manual
2520		1148.59		Ambiguous		PGC-specific RT patterns		UniCarb-DB	Homo sapiens and Sus scrofa	N/A	N/A		m/z 0.35	m/z 0.5	Manual	Manual	Manual	Manual	Precursor mass, retention time order, best possible MS2 match for possible structures	Manual
2647		1294.18		Ambiguous		PGC-specific RT patterns		UniCarb-DB	Homo sapiens and Sus scrofa	N/A	N/A		m/z 0.35	m/z 0.5	Manual	Manual	Manual	Manual	Precursor mass, retention time order, best possible MS2 match for possible structures	Manual
2472		1294.18		Ambiguous		PGC-specific RT patterns		UniCarb-DB	Homo sapiens and Sus scrofa	N/A	N/A		m/z 0.35	m/z 0.5	Manual	Manual	Manual	Manual	Precursor mass, retention time order, best possible MS2 match for possible structures	Manual
2583		1439.78		Ambiguous		PGC-specific RT patterns		UniCarb-DB	Homo sapiens and Sus scrofa	N/A	N/A		m/z 0.35	m/z 0.5	Manual	Manual	Manual	Manual	Precursor mass, retention time order, best possible MS2 match for possible structures	Manual
2638		1439.78		Ambiguous		PGC-specific RT patterns		UniCarb-DB	Homo sapiens and Sus scrofa	N/A	N/A		m/z 0.35	m/z 0.5	Manual	Manual	Manual	Manual	Precursor mass, retention time order, best possible MS2 match for possible structures	Manual
2677		1439.78		Ambiguous		PGC-specific RT patterns		UniCarb-DB	Homo sapiens and Sus scrofa	N/A	N/A		m/z 0.35	m/z 0.5	Manual	Manual	Manual	Manual	Precursor mass, retention time order, best possible MS2 match for possible structures	Manual
2374		1439.78		Ambiguous		PGC-specific RT patterns		UniCarb-DB	Homo sapiens and Sus scrofa	N/A	N/A		m/z 0.35	m/z 0.5	Manual	Manual	Manual	Manual	Precursor mass, retention time order, best possible MS2 match for possible structures	Manual
2200		832.92		Ambiguous		PGC-specific RT patterns		UniCarb-DB	Homo sapiens and Sus scrofa	N/A	N/A		m/z 0.35	m/z 0.5	Manual	Manual	Manual	Manual	Precursor mass, retention time order, best possible MS2 match for possible structures	Manual
2363		832.92		Ambiguous		PGC-specific RT patterns		UniCarb-DB	Homo sapiens and Sus scrofa	N/A	N/A		m/z 0.35	m/z 0.5	Manual	Manual	Manual	Manual	Precursor mass, retention time order, best possible MS2 match for possible structures	Manual
2703		1404.26		Ambiguous		PGC-specific RT patterns		UniCarb-DB	Homo sapiens and Sus scrofa	N/A	N/A		m/z 0.35	m/z 0.5	Manual	Manual	Manual	Manual	Precursor mass, retention time order, best possible MS2 match for possible structures	Manual
2838		1404.26		Ambiguous		PGC-specific RT patterns		UniCarb-DB	Homo sapiens and Sus scrofa	N/A	N/A		m/z 0.35	m/z 0.5	Manual	Manual	Manual	Manual	Precursor mass, retention time order, best possible MS2 match for possible structures	Manual
2911		1404.26		Ambiguous		PGC-specific RT patterns		UniCarb-DB	Homo sapiens and Sus scrofa	N/A	N/A		m/z 0.35	m/z 0.5	Manual	Manual	Manual	Manual	Precursor mass, retention time order, best possible MS2 match for possible structures	Manual
2643		1549.83		Ambiguous		PGC-specific RT patterns		UniCarb-DB	Homo sapiens and Sus scrofa	N/A	N/A		m/z 0.35	m/z 0.5	Manual	Manual	Manual	Manual	Precursor mass, retention time order, best possible MS2 match for possible structures	Manual
2862		1549.83		Ambiguous		PGC-specific RT patterns		UniCarb-DB	Homo sapiens and Sus scrofa	N/A	N/A		m/z 0.35	m/z 0.5	Manual	Manual	Manual	Manual	Precursor mass, retention time order, best possible MS2 match for possible structures	Manual
2759		1232.32		Ambiguous		PGC-specific RT patterns		UniCarb-DB	Homo sapiens and Sus scrofa	N/A	N/A		m/z 0.35	m/z 0.5	Manual	Manual	Manual	Manual	Precursor mass, retention time order, best possible MS2 match for possible structures	Manual
2713		1695.41		Ambiguous		PGC-specific RT patterns		UniCarb-DB	Homo sapiens and Sus scrofa	N/A	N/A		m/z 0.35	m/z 0.5	Manual	Manual	Manual	Manual	Precursor mass, retention time order, best possible MS2 match for possible structures	Manual
2789		1695.41		Ambiguous		PGC-specific RT patterns		UniCarb-DB	Homo sapiens and Sus scrofa	N/A	N/A		m/z 0.35	m/z 0.5	Manual	Manual	Manual	Manual	Precursor mass, retention time order, best possible MS2 match for possible structures	Manual
2890		1226.97		Ambiguous		PGC-specific RT patterns		UniCarb-DB	Homo sapiens and Sus scrofa	N/A	N/A		m/z 0.35	m/z 0.5	Manual	Manual	Manual	Manual	Precursor mass, retention time order, best possible MS2 match for possible structures	Manual
2717		1258.67		Ambiguous		PGC-specific RT patterns		UniCarb-DB	Homo sapiens and Sus scrofa	N/A	N/A		m/z 0.35	m/z 0.5	Manual	Manual	Manual	Manual	Precursor mass, retention time order, best possible MS2 match for possible structures	Manual
2689		1178.28		Ambiguous		PGC-specific RT patterns		UniCarb-DB	Homo sapiens and Sus scrofa	N/A	N/A		m/z 0.35	m/z 0.5	Manual	Manual	Manual	Manual	Precursor mass, retention time order, best possible MS2 match for possible structures	Manual
2873		1251.68		Ambiguous		PGC-specific RT patterns		UniCarb-DB	Homo sapiens and Sus scrofa	N/A	N/A		m/z 0.35	m/z 0.5	Manual	Manual	Manual	Manual	Precursor mass, retention time order, best possible MS2 match for possible structures	Manual
2895		1251.68		Ambiguous		PGC-specific RT patterns		UniCarb-DB	Homo sapiens and Sus scrofa	N/A	N/A		m/z 0.35	m/z 0.5	Manual	Manual	Manual	Manual	Precursor mass, retention time order, best possible MS2 match for possible structures	Manual
2967		1348.72		Ambiguous		PGC-specific RT patterns		UniCarb-DB	Homo sapiens and Sus scrofa	N/A	N/A		m/z 0.35	m/z 0.5	Manual	Manual	Manual	Manual	Precursor mass, retention time order, best possible MS2 match for possible structures	Manual
2962		1348.72		Ambiguous		PGC-specific RT patterns		UniCarb-DB	Homo sapiens and Sus scrofa	N/A	N/A		m/z 0.35	m/z 0.5	Manual	Manual	Manual	Manual	Precursor mass, retention time order, best possible MS2 match for possible structures	Manual
945		675.32		G40269CS		PGC-specific RT patterns		UniCarb-DB	Homo sapiens and Sus scrofa	N/A	N/A		m/z 0.35	m/z 0.5	Manual	Manual	Manual	Manual	Precursor mass, retention time order, best possible MS2 match for possible structures	Manual
915		505.2		G14831JP		PGC-specific RT patterns		UniCarb-DB	Homo sapiens and Sus scrofa	N/A	N/A		m/z 0.35	m/z 0.5	Manual	Manual	Manual	Manual	Precursor mass, retention time order, best possible MS2 match for possible structures	Manual
741		587.29		G67274NW		PGC-specific RT patterns		UniCarb-DB	Homo sapiens and Sus scrofa	N/A	N/A		m/z 0.35	m/z 0.5	Manual	Manual	Manual	Manual	Precursor mass, retention time order, best possible MS2 match for possible structures	Manual
1027		587.29		G31601FB		PGC-specific RT patterns		UniCarb-DB	Homo sapiens and Sus scrofa	N/A	N/A		m/z 0.35	m/z 0.5	Manual	Manual	Manual	Manual	Precursor mass, retention time order, best possible MS2 match for possible structures	Manual
1026		878.43		G40188OO		PGC-specific RT patterns		UniCarb-DB	Homo sapiens and Sus scrofa	N/A	N/A		m/z 0.35	m/z 0.5	Manual	Manual	Manual	Manual	Precursor mass, retention time order, best possible MS2 match for possible structures	Manual
1103		966.54		G84906ML		PGC-specific RT patterns		UniCarb-DB	Homo sapiens and Sus scrofa	N/A	N/A		m/z 0.35	m/z 0.5	Manual	Manual	Manual	Manual	Precursor mass, retention time order, best possible MS2 match for possible structures	Manual
1260		1005.44		G85626DA		PGC-specific RT patterns		UniCarb-DB	Homo sapiens and Sus scrofa	N/A	N/A		m/z 0.35	m/z 0.5	Manual	Manual	Manual	Manual	Precursor mass, retention time order, best possible MS2 match for possible structures	Manual
1273		587.29		G21312EA		PGC-specific RT patterns		UniCarb-DB	Homo sapiens and Sus scrofa	N/A	N/A		m/z 0.35	m/z 0.5	Manual	Manual	Manual	Manual	Precursor mass, retention time order, best possible MS2 match for possible structures	Manual
1276		790.4		G73663RH		PGC-specific RT patterns		UniCarb-DB	Homo sapiens and Sus scrofa	N/A	N/A		m/z 0.35	m/z 0.5	Manual	Manual	Manual	Manual	Precursor mass, retention time order, best possible MS2 match for possible structures	Manual
1289		1178.56		G72261BF		PGC-specific RT patterns		UniCarb-DB	Homo sapiens and Sus scrofa	N/A	N/A		m/z 0.35	m/z 0.5	Manual	Manual	Manual	Manual	Precursor mass, retention time order, best possible MS2 match for possible structures	Manual
1284		843.36		G14278VS		PGC-specific RT patterns		UniCarb-DB	Homo sapiens and Sus scrofa	N/A	N/A		m/z 0.35	m/z 0.5	Manual	Manual	Manual	Manual	Precursor mass, retention time order, best possible MS2 match for possible structures	Manual
1291		667.3		G48522XQ		PGC-specific RT patterns		UniCarb-DB	Homo sapiens and Sus scrofa	N/A	N/A		m/z 0.35	m/z 0.5	Manual	Manual	Manual	Manual	Precursor mass, retention time order, best possible MS2 match for possible structures	Manual
1330		975.42		G01302LF		PGC-specific RT patterns		UniCarb-DB	Homo sapiens and Sus scrofa	N/A	N/A		m/z 0.35	m/z 0.5	Manual	Manual	Manual	Manual	Precursor mass, retention time order, best possible MS2 match for possible structures	Manual
1354		1219.61		G23031BI		PGC-specific RT patterns		UniCarb-DB	Homo sapiens and Sus scrofa	N/A	N/A		m/z 0.35	m/z 0.5	Manual	Manual	Manual	Manual	Precursor mass, retention time order, best possible MS2 match for possible structures	Manual
1402		878.43		G35679QA		PGC-specific RT patterns		UniCarb-DB	Homo sapiens and Sus scrofa	N/A	N/A		m/z 0.35	m/z 0.5	Manual	Manual	Manual	Manual	Precursor mass, retention time order, best possible MS2 match for possible structures	Manual
1405		1016.46		G48422CN		PGC-specific RT patterns		UniCarb-DB	Homo sapiens and Sus scrofa	N/A	N/A		m/z 0.35	m/z 0.5	Manual	Manual	Manual	Manual	Precursor mass, retention time order, best possible MS2 match for possible structures	Manual
1410		667.3		G55486HO		PGC-specific RT patterns		UniCarb-DB	Homo sapiens and Sus scrofa	N/A	N/A		m/z 0.35	m/z 0.5	Manual	Manual	Manual	Manual	Precursor mass, retention time order, best possible MS2 match for possible structures	Manual
1426		975.42		G62621XS		PGC-specific RT patterns		UniCarb-DB	Homo sapiens and Sus scrofa	N/A	N/A		m/z 0.35	m/z 0.5	Manual	Manual	Manual	Manual	Precursor mass, retention time order, best possible MS2 match for possible structures	Manual
1425		1167.56		G39563YN		PGC-specific RT patterns		UniCarb-DB	Homo sapiens and Sus scrofa	N/A	N/A		m/z 0.35	m/z 0.5	Manual	Manual	Manual	Manual	Precursor mass, retention time order, best possible MS2 match for possible structures	Manual
1458		1016.46		G87422MU		PGC-specific RT patterns		UniCarb-DB	Homo sapiens and Sus scrofa	N/A	N/A		m/z 0.35	m/z 0.5	Manual	Manual	Manual	Manual	Precursor mass, retention time order, best possible MS2 match for possible structures	Manual
1441		1005.44		Unspecified		PGC-specific RT patterns		UniCarb-DB	Homo sapiens and Sus scrofa	N/A	N/A		m/z 0.35	m/z 0.5	Manual	Manual	Manual	Manual	Precursor mass, retention time order, best possible MS2 match for possible structures	Manual
1456		749.38		G18132YR		PGC-specific RT patterns		UniCarb-DB	Homo sapiens and Sus scrofa	N/A	N/A		m/z 0.35	m/z 0.5	Manual	Manual	Manual	Manual	Precursor mass, retention time order, best possible MS2 match for possible structures	Manual
1486		733.42		G57540FR		PGC-specific RT patterns		UniCarb-DB	Homo sapiens and Sus scrofa	N/A	N/A		m/z 0.35	m/z 0.5	Manual	Manual	Manual	Manual	Precursor mass, retention time order, best possible MS2 match for possible structures	Manual
1518		952.49		G39615UL		PGC-specific RT patterns		UniCarb-DB	Homo sapiens and Sus scrofa	N/A	N/A		m/z 0.35	m/z 0.5	Manual	Manual	Manual	Manual	Precursor mass, retention time order, best possible MS2 match for possible structures	Manual
1531		1081.59		Ambiguous		PGC-specific RT patterns		UniCarb-DB	Homo sapiens and Sus scrofa	N/A	N/A		m/z 0.35	m/z 0.5	Manual	Manual	Manual	Manual	Precursor mass, retention time order, best possible MS2 match for possible structures	Manual
1544		1139.64		G54295IW		PGC-specific RT patterns		UniCarb-DB	Homo sapiens and Sus scrofa	N/A	N/A		m/z 0.35	m/z 0.5	Manual	Manual	Manual	Manual	Precursor mass, retention time order, best possible MS2 match for possible structures	Manual
1537		993.52		G71522YD		PGC-specific RT patterns		UniCarb-DB	Homo sapiens and Sus scrofa	N/A	N/A		m/z 0.35	m/z 0.5	Manual	Manual	Manual	Manual	Precursor mass, retention time order, best possible MS2 match for possible structures	Manual
1550		1081.59		G05625EO		PGC-specific RT patterns		UniCarb-DB	Homo sapiens and Sus scrofa	N/A	N/A		m/z 0.35	m/z 0.5	Manual	Manual	Manual	Manual	Precursor mass, retention time order, best possible MS2 match for possible structures	Manual
1564		1243.65		G76500NB		PGC-specific RT patterns		UniCarb-DB	Homo sapiens and Sus scrofa	N/A	N/A		m/z 0.35	m/z 0.5	Manual	Manual	Manual	Manual	Precursor mass, retention time order, best possible MS2 match for possible structures	Manual
1578		952.49		G39615UL		PGC-specific RT patterns		UniCarb-DB	Homo sapiens and Sus scrofa	N/A	N/A		m/z 0.35	m/z 0.5	Manual	Manual	Manual	Manual	Precursor mass, retention time order, best possible MS2 match for possible structures	Manual
1585		993.52		G71522YD		PGC-specific RT patterns		UniCarb-DB	Homo sapiens and Sus scrofa	N/A	N/A		m/z 0.35	m/z 0.5	Manual	Manual	Manual	Manual	Precursor mass, retention time order, best possible MS2 match for possible structures	Manual
1589		749.38		G54461SS		PGC-specific RT patterns		UniCarb-DB	Homo sapiens and Sus scrofa	N/A	N/A		m/z 0.35	m/z 0.5	Manual	Manual	Manual	Manual	Precursor mass, retention time order, best possible MS2 match for possible structures	Manual
1602		936.52		G99772FN		PGC-specific RT patterns		UniCarb-DB	Homo sapiens and Sus scrofa	N/A	N/A		m/z 0.35	m/z 0.5	Manual	Manual	Manual	Manual	Precursor mass, retention time order, best possible MS2 match for possible structures	Manual
1606		952.49		G84064VM		PGC-specific RT patterns		UniCarb-DB	Homo sapiens and Sus scrofa	N/A	N/A		m/z 0.35	m/z 0.5	Manual	Manual	Manual	Manual	Precursor mass, retention time order, best possible MS2 match for possible structures	Manual
1607		1040.56		Ambiguous		PGC-specific RT patterns		UniCarb-DB	Homo sapiens and Sus scrofa	N/A	N/A		m/z 0.35	m/z 0.5	Manual	Manual	Manual	Manual	Precursor mass, retention time order, best possible MS2 match for possible structures	Manual
1622		1081.59		G01437WY		PGC-specific RT patterns		UniCarb-DB	Homo sapiens and Sus scrofa	N/A	N/A		m/z 0.35	m/z 0.5	Manual	Manual	Manual	Manual	Precursor mass, retention time order, best possible MS2 match for possible structures	Manual
1631		1331.69		G52120NK		PGC-specific RT patterns		UniCarb-DB	Homo sapiens and Sus scrofa	N/A	N/A		m/z 0.35	m/z 0.5	Manual	Manual	Manual	Manual	Precursor mass, retention time order, best possible MS2 match for possible structures	Manual
1626		829.38		G92707AV		PGC-specific RT patterns		UniCarb-DB	Homo sapiens and Sus scrofa	N/A	N/A		m/z 0.35	m/z 0.5	Manual	Manual	Manual	Manual	Precursor mass, retention time order, best possible MS2 match for possible structures	Manual
1642		1178.56		Ambiguous		PGC-specific RT patterns		UniCarb-DB	Homo sapiens and Sus scrofa	N/A	N/A		m/z 0.35	m/z 0.5	Manual	Manual	Manual	Manual	Precursor mass, retention time order, best possible MS2 match for possible structures	Manual
1666		1155.64		G96005ME		PGC-specific RT patterns		UniCarb-DB	Homo sapiens and Sus scrofa	N/A	N/A		m/z 0.35	m/z 0.5	Manual	Manual	Manual	Manual	Precursor mass, retention time order, best possible MS2 match for possible structures	Manual
1692		1301.73		Ambiguous		PGC-specific RT patterns		UniCarb-DB	Homo sapiens and Sus scrofa	N/A	N/A		m/z 0.35	m/z 0.5	Manual	Manual	Manual	Manual	Precursor mass, retention time order, best possible MS2 match for possible structures	Manual
1735		1139.64		Ambiguous		PGC-specific RT patterns		UniCarb-DB	Homo sapiens and Sus scrofa	N/A	N/A		m/z 0.35	m/z 0.5	Manual	Manual	Manual	Manual	Precursor mass, retention time order, best possible MS2 match for possible structures	Manual
1733		1186.65		G91474LB		PGC-specific RT patterns		UniCarb-DB	Homo sapiens and Sus scrofa	N/A	N/A		m/z 0.35	m/z 0.5	Manual	Manual	Manual	Manual	Precursor mass, retention time order, best possible MS2 match for possible structures	Manual
1746		1178.56		G74917JV		PGC-specific RT patterns		UniCarb-DB	Homo sapiens and Sus scrofa	N/A	N/A		m/z 0.35	m/z 0.5	Manual	Manual	Manual	Manual	Precursor mass, retention time order, best possible MS2 match for possible structures	Manual
1758		1243.65		G20453WS		PGC-specific RT patterns		UniCarb-DB	Homo sapiens and Sus scrofa	N/A	N/A		m/z 0.35	m/z 0.5	Manual	Manual	Manual	Manual	Precursor mass, retention time order, best possible MS2 match for possible structures	Manual
1774		821.4		G60138JZ		PGC-specific RT patterns		UniCarb-DB	Homo sapiens and Sus scrofa	N/A	N/A		m/z 0.35	m/z 0.5	Manual	Manual	Manual	Manual	Precursor mass, retention time order, best possible MS2 match for possible structures	Manual
1811		895.45		G16440EL		PGC-specific RT patterns		UniCarb-DB	Homo sapiens and Sus scrofa	N/A	N/A		m/z 0.35	m/z 0.5	Manual	Manual	Manual	Manual	Precursor mass, retention time order, best possible MS2 match for possible structures	Manual
1823		1301.73		Ambiguous		PGC-specific RT patterns		UniCarb-DB	Homo sapiens and Sus scrofa	N/A	N/A		m/z 0.35	m/z 0.5	Manual	Manual	Manual	Manual	Precursor mass, retention time order, best possible MS2 match for possible structures	Manual
1835		1447.8		G18950NM		PGC-specific RT patterns		UniCarb-DB	Homo sapiens and Sus scrofa	N/A	N/A		m/z 0.35	m/z 0.5	Manual	Manual	Manual	Manual	Precursor mass, retention time order, best possible MS2 match for possible structures	Manual
1882		678.83		Ambiguous		PGC-specific RT patterns		UniCarb-DB	Homo sapiens and Sus scrofa	N/A	N/A		m/z 0.35	m/z 0.5	Manual	Manual	Manual	Manual	Precursor mass, retention time order, best possible MS2 match for possible structures	Manual
1889		1121.54		G43933MN		PGC-specific RT patterns		UniCarb-DB	Homo sapiens and Sus scrofa	N/A	N/A		m/z 0.35	m/z 0.5	Manual	Manual	Manual	Manual	Precursor mass, retention time order, best possible MS2 match for possible structures	Manual
1903		1186.65		G12428MZ		PGC-specific RT patterns		UniCarb-DB	Homo sapiens and Sus scrofa	N/A	N/A		m/z 0.35	m/z 0.5	Manual	Manual	Manual	Manual	Precursor mass, retention time order, best possible MS2 match for possible structures	Manual
1950		530.29		G05187DJ		PGC-specific RT patterns		UniCarb-DB	Homo sapiens and Sus scrofa	N/A	N/A		m/z 0.35	m/z 0.5	Manual	Manual	Manual	Manual	Precursor mass, retention time order, best possible MS2 match for possible structures	Manual
1987		832.92		Ambiguous		PGC-specific RT patterns		UniCarb-DB	Homo sapiens and Sus scrofa	N/A	N/A		m/z 0.35	m/z 0.5	Manual	Manual	Manual	Manual	Precursor mass, retention time order, best possible MS2 match for possible structures	Manual
2012		1114.59		G40107NH		PGC-specific RT patterns		UniCarb-DB	Homo sapiens and Sus scrofa	N/A	N/A		m/z 0.35	m/z 0.5	Manual	Manual	Manual	Manual	Precursor mass, retention time order, best possible MS2 match for possible structures	Manual
2014		1098.65		G08055MG		PGC-specific RT patterns		UniCarb-DB	Homo sapiens and Sus scrofa	N/A	N/A		m/z 0.35	m/z 0.5	Manual	Manual	Manual	Manual	Precursor mass, retention time order, best possible MS2 match for possible structures	Manual
2027		733.42		G77674IK		PGC-specific RT patterns		UniCarb-DB	Homo sapiens and Sus scrofa	N/A	N/A		m/z 0.35	m/z 0.5	Manual	Manual	Manual	Manual	Precursor mass, retention time order, best possible MS2 match for possible structures	Manual
2060		1114.59		G92032WO		PGC-specific RT patterns		UniCarb-DB	Homo sapiens and Sus scrofa	N/A	N/A		m/z 0.35	m/z 0.5	Manual	Manual	Manual	Manual	Precursor mass, retention time order, best possible MS2 match for possible structures	Manual
2057		1301.73		Ambiguous		PGC-specific RT patterns		UniCarb-DB	Homo sapiens and Sus scrofa	N/A	N/A		m/z 0.35	m/z 0.5	Manual	Manual	Manual	Manual	Precursor mass, retention time order, best possible MS2 match for possible structures	Manual
2066		861.48		Ambiguous		PGC-specific RT patterns		UniCarb-DB	Homo sapiens and Sus scrofa	N/A	N/A		m/z 0.35	m/z 0.5	Manual	Manual	Manual	Manual	Precursor mass, retention time order, best possible MS2 match for possible structures	Manual
2081		936.52		G88014YP		PGC-specific RT patterns		UniCarb-DB	Homo sapiens and Sus scrofa	N/A	N/A		m/z 0.35	m/z 0.5	Manual	Manual	Manual	Manual	Precursor mass, retention time order, best possible MS2 match for possible structures	Manual
2104		895.45		G25795DA		PGC-specific RT patterns		UniCarb-DB	Homo sapiens and Sus scrofa	N/A	N/A		m/z 0.35	m/z 0.5	Manual	Manual	Manual	Manual	Precursor mass, retention time order, best possible MS2 match for possible structures	Manual
2112		861.48		G85483CN		PGC-specific RT patterns		UniCarb-DB	Homo sapiens and Sus scrofa	N/A	N/A		m/z 0.35	m/z 0.5	Manual	Manual	Manual	Manual	Precursor mass, retention time order, best possible MS2 match for possible structures	Manual
2132		669.81		Ambiguous		PGC-specific RT patterns		UniCarb-DB	Homo sapiens and Sus scrofa	N/A	N/A		m/z 0.35	m/z 0.5	Manual	Manual	Manual	Manual	Precursor mass, retention time order, best possible MS2 match for possible structures	Manual
2156		1244.69		G48365EK		PGC-specific RT patterns		UniCarb-DB	Homo sapiens and Sus scrofa	N/A	N/A		m/z 0.35	m/z 0.5	Manual	Manual	Manual	Manual	Precursor mass, retention time order, best possible MS2 match for possible structures	Manual
2165		1098.65		G53188WR		PGC-specific RT patterns		UniCarb-DB	Homo sapiens and Sus scrofa	N/A	N/A		m/z 0.35	m/z 0.5	Manual	Manual	Manual	Manual	Precursor mass, retention time order, best possible MS2 match for possible structures	Manual
2189		1260.68		Ambiguous		PGC-specific RT patterns		UniCarb-DB	Homo sapiens and Sus scrofa	N/A	N/A		m/z 0.35	m/z 0.5	Manual	Manual	Manual	Manual	Precursor mass, retention time order, best possible MS2 match for possible structures	Manual
2215		739.36		G40792HV		PGC-specific RT patterns		UniCarb-DB	Homo sapiens and Sus scrofa	N/A	N/A		m/z 0.35	m/z 0.5	Manual	Manual	Manual	Manual	Precursor mass, retention time order, best possible MS2 match for possible structures	Manual
2246		1203.66		G20735IM		PGC-specific RT patterns		UniCarb-DB	Homo sapiens and Sus scrofa	N/A	N/A		m/z 0.35	m/z 0.5	Manual	Manual	Manual	Manual	Precursor mass, retention time order, best possible MS2 match for possible structures	Manual
2239		832.92		Ambiguous		PGC-specific RT patterns		UniCarb-DB	Homo sapiens and Sus scrofa	N/A	N/A		m/z 0.35	m/z 0.5	Manual	Manual	Manual	Manual	Precursor mass, retention time order, best possible MS2 match for possible structures	Manual
2267		731.36		Ambiguous		PGC-specific RT patterns		UniCarb-DB	Homo sapiens and Sus scrofa	N/A	N/A		m/z 0.35	m/z 0.5	Manual	Manual	Manual	Manual	Precursor mass, retention time order, best possible MS2 match for possible structures	Manual
2287		832.92		Ambiguous		PGC-specific RT patterns		UniCarb-DB	Homo sapiens and Sus scrofa	N/A	N/A		m/z 0.35	m/z 0.5	Manual	Manual	Manual	Manual	Precursor mass, retention time order, best possible MS2 match for possible structures	Manual
2308		832.92		Ambiguous		PGC-specific RT patterns		UniCarb-DB	Homo sapiens and Sus scrofa	N/A	N/A		m/z 0.35	m/z 0.5	Manual	Manual	Manual	Manual	Precursor mass, retention time order, best possible MS2 match for possible structures	Manual
2306		1260.68		Ambiguous		PGC-specific RT patterns		UniCarb-DB	Homo sapiens and Sus scrofa	N/A	N/A		m/z 0.35	m/z 0.5	Manual	Manual	Manual	Manual	Precursor mass, retention time order, best possible MS2 match for possible structures	Manual
2311		1041.64		G91669BT		PGC-specific RT patterns		UniCarb-DB	Homo sapiens and Sus scrofa	N/A	N/A		m/z 0.35	m/z 0.5	Manual	Manual	Manual	Manual	Precursor mass, retention time order, best possible MS2 match for possible structures	Manual
2338		1477.75		G03266UM		PGC-specific RT patterns		UniCarb-DB	Homo sapiens and Sus scrofa	N/A	N/A		m/z 0.35	m/z 0.5	Manual	Manual	Manual	Manual	Precursor mass, retention time order, best possible MS2 match for possible structures	Manual
2377		885.5		Ambiguous		PGC-specific RT patterns		UniCarb-DB	Homo sapiens and Sus scrofa	N/A	N/A		m/z 0.35	m/z 0.5	Manual	Manual	Manual	Manual	Precursor mass, retention time order, best possible MS2 match for possible structures	Manual
2389		832.92		G36970ZN		PGC-specific RT patterns		UniCarb-DB	Homo sapiens and Sus scrofa	N/A	N/A		m/z 0.35	m/z 0.5	Manual	Manual	Manual	Manual	Precursor mass, retention time order, best possible MS2 match for possible structures	Manual
2408		1203.66		Ambiguous		PGC-specific RT patterns		UniCarb-DB	Homo sapiens and Sus scrofa	N/A	N/A		m/z 0.35	m/z 0.5	Manual	Manual	Manual	Manual	Precursor mass, retention time order, best possible MS2 match for possible structures	Manual
2414		812.43		Ambiguous		PGC-specific RT patterns		UniCarb-DB	Homo sapiens and Sus scrofa	N/A	N/A		m/z 0.35	m/z 0.5	Manual	Manual	Manual	Manual	Precursor mass, retention time order, best possible MS2 match for possible structures	Manual
2411		804.43		G50849OF		PGC-specific RT patterns		UniCarb-DB	Homo sapiens and Sus scrofa	N/A	N/A		m/z 0.35	m/z 0.5	Manual	Manual	Manual	Manual	Precursor mass, retention time order, best possible MS2 match for possible structures	Manual
2426		733.42		Ambiguous		PGC-specific RT patterns		UniCarb-DB	Homo sapiens and Sus scrofa	N/A	N/A		m/z 0.35	m/z 0.5	Manual	Manual	Manual	Manual	Precursor mass, retention time order, best possible MS2 match for possible structures	Manual
2416		1041.64		G91731DX		PGC-specific RT patterns		UniCarb-DB	Homo sapiens and Sus scrofa	N/A	N/A		m/z 0.35	m/z 0.5	Manual	Manual	Manual	Manual	Precursor mass, retention time order, best possible MS2 match for possible structures	Manual
2458		804.43		G50849OF		PGC-specific RT patterns		UniCarb-DB	Homo sapiens and Sus scrofa	N/A	N/A		m/z 0.35	m/z 0.5	Manual	Manual	Manual	Manual	Precursor mass, retention time order, best possible MS2 match for possible structures	Manual
2455		885.5		Ambiguous		PGC-specific RT patterns		UniCarb-DB	Homo sapiens and Sus scrofa	N/A	N/A		m/z 0.35	m/z 0.5	Manual	Manual	Manual	Manual	Precursor mass, retention time order, best possible MS2 match for possible structures	Manual
2495		1260.68		G14623FX		PGC-specific RT patterns		UniCarb-DB	Homo sapiens and Sus scrofa	N/A	N/A		m/z 0.35	m/z 0.5	Manual	Manual	Manual	Manual	Precursor mass, retention time order, best possible MS2 match for possible structures	Manual
2527		702.87		G33886DT		PGC-specific RT patterns		UniCarb-DB	Homo sapiens and Sus scrofa	N/A	N/A		m/z 0.35	m/z 0.5	Manual	Manual	Manual	Manual	Precursor mass, retention time order, best possible MS2 match for possible structures	Manual
2562		804.43		G75357VU		PGC-specific RT patterns		UniCarb-DB	Homo sapiens and Sus scrofa	N/A	N/A		m/z 0.35	m/z 0.5	Manual	Manual	Manual	Manual	Precursor mass, retention time order, best possible MS2 match for possible structures	Manual
2596		885.5		Ambiguous		PGC-specific RT patterns		UniCarb-DB	Homo sapiens and Sus scrofa	N/A	N/A		m/z 0.35	m/z 0.5	Manual	Manual	Manual	Manual	Precursor mass, retention time order, best possible MS2 match for possible structures	Manual
2608		958.52		G35941VN		PGC-specific RT patterns		UniCarb-DB	Homo sapiens and Sus scrofa	N/A	N/A		m/z 0.35	m/z 0.5	Manual	Manual	Manual	Manual	Precursor mass, retention time order, best possible MS2 match for possible structures	Manual
2620		987.02		G75042KU		PGC-specific RT patterns		UniCarb-DB	Homo sapiens and Sus scrofa	N/A	N/A		m/z 0.35	m/z 0.5	Manual	Manual	Manual	Manual	Precursor mass, retention time order, best possible MS2 match for possible structures	Manual
2633		1244.69		G56979BY		PGC-specific RT patterns		UniCarb-DB	Homo sapiens and Sus scrofa	N/A	N/A		m/z 0.35	m/z 0.5	Manual	Manual	Manual	Manual	Precursor mass, retention time order, best possible MS2 match for possible structures	Manual
2652		804.43		Ambiguous		PGC-specific RT patterns		UniCarb-DB	Homo sapiens and Sus scrofa	N/A	N/A		m/z 0.35	m/z 0.5	Manual	Manual	Manual	Manual	Precursor mass, retention time order, best possible MS2 match for possible structures	Manual
2675		885.5		Ambiguous		PGC-specific RT patterns		UniCarb-DB	Homo sapiens and Sus scrofa	N/A	N/A		m/z 0.35	m/z 0.5	Manual	Manual	Manual	Manual	Precursor mass, retention time order, best possible MS2 match for possible structures	Manual
2686		987.02		G06448OR		PGC-specific RT patterns		UniCarb-DB	Homo sapiens and Sus scrofa	N/A	N/A		m/z 0.35	m/z 0.5	Manual	Manual	Manual	Manual	Precursor mass, retention time order, best possible MS2 match for possible structures	Manual
2710		885.5		G41552DE		PGC-specific RT patterns		UniCarb-DB	Homo sapiens and Sus scrofa	N/A	N/A		m/z 0.35	m/z 0.5	Manual	Manual	Manual	Manual	Precursor mass, retention time order, best possible MS2 match for possible structures	Manual
2798		812.43		G24327KR		PGC-specific RT patterns		UniCarb-DB	Homo sapiens and Sus scrofa	N/A	N/A		m/z 0.35	m/z 0.5	Manual	Manual	Manual	Manual	Precursor mass, retention time order, best possible MS2 match for possible structures	Manual
2826		958.52		G367886TD		PGC-specific RT patterns		UniCarb-DB	Homo sapiens and Sus scrofa	N/A	N/A		m/z 0.35	m/z 0.5	Manual	Manual	Manual	Manual	Precursor mass, retention time order, best possible MS2 match for possible structures	Manual
2852		812.43		Ambiguous		PGC-specific RT patterns		UniCarb-DB	Homo sapiens and Sus scrofa	N/A	N/A		m/z 0.35	m/z 0.5	Manual	Manual	Manual	Manual	Precursor mass, retention time order, best possible MS2 match for possible structures	Manual
2892		812.43		G01520KE		PGC-specific RT patterns		UniCarb-DB	Homo sapiens and Sus scrofa	N/A	N/A		m/z 0.35	m/z 0.5	Manual	Manual	Manual	Manual	Precursor mass, retention time order, best possible MS2 match for possible structures	Manual

## Sheet: MIRAGE-LC
1. General features
	1. General features — (a) Global descriptors
	Date stamp	2019-01-28
	Responsible person. Provide name,	Christopher Ashwood
	Affiliation	Medical College of Wisconsin, USA
	Stable contact information	chrashwood@gmail.com
2. Equipment
	Instrument manufacturer	Dionex
	Instrument model	UltiMate3000
	Instrument details	Fused silica tubing, 30um ID, total length 2m, fused silica sample loop, column heater used
	2.1 Column Details & Characteristics
	Manufacturer	Thermofisher Scientific
	Model	35003-100265
	Separation Mode	Reversed phase
	Column Dimensions	100mm x 0.18mm
	Stationary phase	Porous graphitized carbon, 3um
	Column heater	Held at 60oC (+/- 5oC)
	Additional accessories	In-line filter
	2.2 Mobile Phase
	Description of solvent	Mobile phase A: 10mM ammonium bicarbonate 100% H2O, Mobile phase B: 10mM ammonium bicarbonate 70% acetonitrile and 30% H2O
	Description of consitutents	Millipore (supplied all solvents) and Sigma Aldrich (A6141-1KG, >99% purity). pH 7.8. No adjustment.
	2.3 Properties of Chromatographic Run
	Time	83 minutes
	Gradient	0-5 min 1% B, 5-73 min linear ramp from 7.8% B to 64.3% B, 73-78 min 99% B, 78-83 min 1% B.
	Flow Rate	Constant 4ul/min.
	Temperature	60
	Sample injection	uLpickup, 3uL injection, 10uL sample loop, sample dissolved in buffer A, flush volume 2.4uL, samples stored at 5oC, glass vials used.
	2.4 Pre- and Post- Run Processes
	Type	N/A
	Substance, Standards	Reduced dextran ladder used as internal standard, 26ng added to glycan mixtures.
	Time	NA
	Flow Rate	NA
	Post separation events	NA
	Column regeneration	No regeneration performed beyond washing with 100% B. Unknown number of injections until separation deteriorates.
	Equipment used for detection	MS, parameters described in MIRAGE-MS.
	Type	NA
	Detection system	NA
	Equipment settings	NA
	Timescale over which data was collected	NA
	2.5 Column outputs - Fractions (if separation purpose is preparative)
	Fraction name	NA
	Fraction description	NA
	Flow split	NA
	LC-MALDI spotting	NA
	2.6 Data annotation
	Database	NA
	Software	NA
	Peak selection	NA
	Peak quantitation	NA
	Trace output	NA
3. Exoglycosidase treatment
	Supplier	Not performed
	Exoglycosidase preparation	Not performed
	Reaction time	Not performed
	Control	Not performed
	Protocol	Not performed
